# Supplementary material for: Cu-Catalyzedcis-selective ring-opening cross-coupling of an oxabicyclic olefin with an organoboron reagent
Source: Royal Society of Chemistry journal article supplement (doi:10.1039/d0ob02557g), 2021-01-01
Supplement: d0ob02557g1.pdf [file d0ob02557g1.pdf]

## Supporting Information

### **Cu<sup>I</sup>-Catalyzed Ring-Opening Cross-Coupling of Oxabicyclic Olefin with Organoboron Reagent**

Bowen Liu,<sup>a</sup> Guochun Peng,<sup>b</sup> Yu Zhang,<sup>b</sup> Chunhui Liu,<sup>c,d</sup> Jinbo Zhao\*<sup>a</sup>

<sup>a</sup> Department of Chemistry and Biology, Changchun University of Technology, Changchun,  
Jilin 130012, P. R. China

<sup>b</sup> Key Laboratory of Functional Molecule Design of Jilin Province, Department of Chemistry,  
Northeast Normal University, Changchun Jilin 130024 P. R. China

<sup>c</sup> College of Chemical and Materials Engineering, Xuchang University, Xuchang, Henan,  
461000, P. R. China;

<sup>d</sup> College of Chemistry and Institute of Green Catalysis, Zhengzhou Univeristy, Zhengzhou,  
Henan, 450001, P. R. China

Email: zhaojinbo@ccut.edu.cn

### **Table of Contents**

|                                                               |    |
|---------------------------------------------------------------|----|
| 1. General Information.....                                   | 2  |
| 2. Experimental procedures and Compound Characterization..... | 3  |
| 3. Computational Details.....                                 | 12 |
| 4. References.....                                            | 25 |
| 5. NMR spectra of all new compounds.....                      | 26 |
| 6. HPLC traces of <b>3a</b> * .....                           | 51 |

## 1. General information.

Unless otherwise noted, all reactions were carried out with distilled and dried solvents under a nitrogen atmosphere. All commercial chemicals were used without further purification. Tetrahydrofuran and toluene were distilled over sodium with benzophenone as indicator. Tertiary butanol was distilled from calcium hydride. All Cu salts, ligands and NaO*t*-Bu were purchased from commercial sources. Oxabicyclic olefins<sup>1-4</sup> and neopentyl boronic esters<sup>5,6</sup> were synthesized according to literature. <sup>1</sup>H NMR and <sup>13</sup>C NMR spectra were recorded on Varian 400 or Bruker 400, 500 or 600 MHz spectrometer at 25°C. Chemical shifts (δ) are expressed in parts per million (ppm) relative to internal standards (0 ppm (TMS) for <sup>1</sup>H NMR and 77.0 ppm (CDCl<sub>3</sub>) for <sup>13</sup>C NMR). High resolution mass spectra were recorded on Bruker microTOF spectrometer. Copies of NMR were processed with MestReNova Software. Enantiomeric excesses (ee) were determined by Agilent 1260 Series HPLC on chiral stationary phases. Flash chromatography was performed on silica gel 60 (particle size 300-400 mesh ASTM, purchased from Taizhou, China).

## 2. Experimental procedures and Compound Characterization

**2.1 General procedure for the Cu-catalyzed ring-opening cross coupling reaction of oxabicyclic olefin with organoboronic esters.**

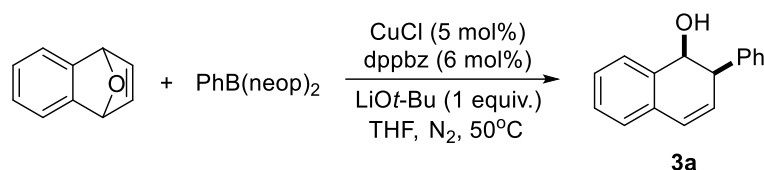

In a N<sub>2</sub> filled glove box, a 25 mL pressure tube was charged successfully with CuCl (5 mol%), dppbz (6 mol%), and anhydrous THF (2 mL). After stirring for 15 min, LiOt-Bu (0.2 mmol, 1 equiv.) **2a** (0.3 mmol, 1.5 equiv.) and **1a** (0.2 mmol) were sequentially added with stirring. The tube was sealed, taken out of the glove box and placed in a 50°C oil bath to react for 24 h, at which time the mixture was added saturated Na<sub>2</sub>CO<sub>3</sub> and extracted with DCM (10 mL x 3). The organic phases were combined, and the solvent was removed in vacuo. The residue was subjected to flash chromatography to obtain the product **3a** (26.7 mg, 60% yield) as a yellow oil.

**2-Phenyl-1,2-dihydronaphthalen-1-ol (3a):** <sup>1</sup>H NMR (400 MHz, DMSO-*d*<sub>6</sub>) δ 7.28 – 7.12 (m, 9H), 6.68 (d, *J* = 8.0 Hz, 1H), 6.10 (dd, *J* = 8.0, 4.0 Hz, 1H), 5.17 (d, *J* = 4.0 Hz, 1H), 4.87 (t, *J* = 4.0 Hz, 1H), 3.72 (t, *J* = 4.0 Hz, 1H).

<sup>13</sup>C NMR (126 MHz, DMSO-*d*<sub>6</sub>) δ 139.4, 138.1, 133.1, 131.3, 129.8, 128.1, 128.0, 127.7, 126.8, 126.4, 126.2, 70.2, 46.9.

HRMS (ESI-TOF) (*m/z*): Calcd for C<sub>16</sub>H<sub>14</sub>ONa ([M+Na]<sup>+</sup>), 245.0937, found 245.0943.

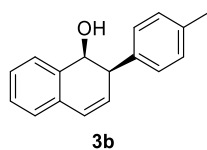

**2-(*p*-Tolyl)-1,2-dihydronaphthalen-1-ol (3b):** following the general procedure, the reaction of **1a** (0.2 mmol) and 5,5-dimethyl-2-(*p*-tolyl)-1,3,2-dioxaborinane (61.2 mg, 0.3 mmol) afforded the product **3b** (26.0 mg, 55% yield) as a colorless oil.

<sup>1</sup>H NMR (600 MHz, DMSO-*d*<sub>6</sub>) δ 7.30 – 7.13 (m, 4H), 7.00 (q, *J* = 8.1 Hz, 4H), 6.67 (d, *J* = 9.6 Hz, 1H), 6.08 (dd, *J* = 9.6, 4.7 Hz, 1H), 5.10 (d, *J* = 5.4 Hz, 1H), 4.85 (t, *J* = 5.9 Hz, 1H), 3.67 (t, *J* = 5.1 Hz, 1H), 2.22 (s, 3H).

<sup>13</sup>C NMR (151 MHz, DMSO-*d*<sub>6</sub>) δ 137.66, 135.63, 135.20, 132.66, 130.95, 129.17, 128.22, 127.39, 127.34, 127.16, 125.79, 125.59, 69.71, 45.96, 20.61.

HRMS (ESI-TOF) (*m/z*): Calcd for C<sub>16</sub>H<sub>16</sub>ONa ([M+Na]<sup>+</sup>), 259.1093, found 263.1083.

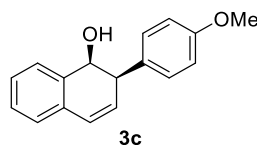

**2-(4-Methoxyphenyl)-1,2-dihydronaphthalen-1-ol (3c):** following the general procedure, the reaction of **1a** (0.2 mmol) and 2-(4-methoxyphenyl)-5,5-dimethyl-1,3,2-dioxaborinane (66.0 mg, 0.3 mmol) afforded the product **3c** (28.2 mg, 56% yield) as a colorless oil.

<sup>1</sup>H NMR (500 MHz, DMSO-*d*<sub>6</sub>) δ 7.29 – 7.25 (m, 1H), 7.21 (m, 2H), 7.15 (dd, *J* = 5.0 Hz, 1H), 7.03 (d, *J* = 10.0 Hz, 2H), 6.77 – 6.74 (m, 2H), 6.67 – 6.63 (m, 1H), 6.07 (dd, *J* = 10.0, 5.0 Hz, 1H), 5.10

(d,  $J = 5.0$  Hz, 1H), 4.84 (t,  $J = 10.0, 45.0$  Hz, 1H), 3.68 – 3.63 (m, 4H).

$^{13}\text{C}$  NMR (126 MHz, DMSO- $d_6$ )  $\delta$  158.4, 138.2, 133.2, 131.6, 130.9, 130.7, 127.9, 127.7, 127.6, 126.2, 126.1, 113.6, 70.2, 55.4, 46.0.

HRMS (ESI-TOF) ( $m/z$ ): Calcd for  $\text{C}_{16}\text{H}_{16}\text{O}_2\text{Na}$  ( $[\text{M}+\text{Na}]^+$ ), 275.1043, found 275.1050.

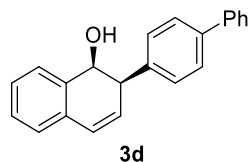

**2-([1,1'-Biphenyl]-4-yl)-1,2-dihydronaphthalen-1-ol (3d):** following the general procedure, the reaction of **1a** (0.2 mmol) and 2-([1,1'-biphenyl]-4-yl)-5,5-dimethyl-1,3,2-dioxaborinane (79.8 mg, 0.3 mmol) afforded the product **3d** (29.8 mg, 50% yield) as a colorless oil.

$^1\text{H}$  NMR (400 MHz, DMSO- $d_6$ )  $\delta$  7.63 – 7.58 (m, 2H), 7.52 – 7.46 (m, 2H), 7.43 (m, 2H), 7.36 – 7.29 (m, 2H), 7.27 – 7.17 (m, 5H), 6.72 (dd,  $J = 8.0, 4.0$  Hz, 1H), 6.13 (dd,  $J = 8.0, 4.0$  Hz, 1H), 5.25 (d,  $J = 4.0$  Hz, 1H), 4.94 (t,  $J = 4.0$  Hz, 1H), 3.78 (t,  $J = 4.0$  Hz, 1H).

$^{13}\text{C}$  NMR (126 MHz, DMSO- $d_6$ )  $\delta$  140.6, 138.8, 138.6, 138.1, 133.1, 131.1, 130.4, 129.3, 128.0, 127.9, 127.7, 127.6, 127.0, 126.5, 126.3, 126.2, 70.2, 46.5.

HRMS (ESI-TOF) ( $m/z$ ): Calcd for  $\text{C}_{22}\text{H}_{18}\text{ONa}$  ( $[\text{M}+\text{Na}]^+$ ), 321.1250, found 321.1248.

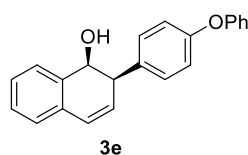

**2-(4-Phenoxyphenyl)-1,2-dihydronaphthalen-1-ol (3e):** following the general procedure, the reaction of **1a** (0.2 mmol) and 5,5-dimethyl-2-(4-phenoxyphenyl)-1,3,2-dioxaborinane (86.4 mg, 0.3 mmol) afforded the product **3e** (34.5 mg, 55% yield) as a colorless oil.

$^1\text{H}$  NMR (500 MHz, DMSO- $d_6$ )  $\delta$  7.38 – 7.29 (m, 3H), 7.22 (s, 2H), 7.15 (m, 3H), 7.10 (m, 1H), 6.95 (d,  $J = 10.0$  Hz, 2H), 6.85 (d,  $J = 5.0$  Hz, 2H), 6.68 (d,  $J = 5.0$  Hz, 1H), 6.09 (dd,  $J = 10.0, 5.0$  Hz, 1H), 5.17 (s, 1H), 4.87 (d,  $J = 10.0$  Hz, 1H), 3.74 (s, 1H).

$^{13}\text{C}$  NMR (126 MHz, DMSO- $d_6$ )  $\delta$  157.4, 155.6, 138.0, 134.5, 133.1, 131.3, 130.4, 128.0, 127.9, 127.7, 126.4, 126.2, 123.6, 118.8, 118.5, 70.1, 46.1.

HRMS (ESI-TOF) ( $m/z$ ): Calcd for  $\text{C}_{22}\text{H}_{18}\text{O}_2\text{Na}$  ( $[\text{M}+\text{Na}]^+$ ), 337.1143, found 337.1139.

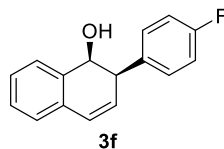

**2-(4-Fluorophenyl)-1,2-dihydronaphthalen-1-ol (3f):** following the general procedure, the reaction of **1a** (0.2 mmol) and 2-(4-fluorophenyl)-5,5-dimethyl-1,3,2-dioxaborinane (62.4 mg, 0.3 mmol) afforded the product **3f** (25.0 mg, 52% yield) as a white solid. mp 85 – 86 °C.

$^1\text{H}$  NMR (400 MHz, Acetone- $d_6$ )  $\delta$  7.35 (d,  $J = 6.9$  Hz, 1H), 7.20 (dd,  $J = 19.3, 8.4$  Hz, 4H), 6.97 (t,  $J = 8.2$  Hz, 2H), 6.71 (d,  $J = 9.4$  Hz, 1H), 6.10 (dd,  $J = 9.7, 4.3$  Hz, 1H), 4.97 (t,  $J = 6.2$  Hz, 1H), 4.02 (d,  $J = 6.3$  Hz, 1H), 3.82 (t,  $J = 5.3$  Hz, 1H).

$^{13}\text{C}$  NMR (101 MHz, acetone- $d_6$ )  $\delta$  162.7 (d,  $^1J_{\text{C-F}} = 243.0$  Hz), 138.3, 135.8 (d,  $^4J_{\text{C-F}} = 2.9$  Hz), 133.8, 132.1 (d,  $^3J_{\text{C-F}} = 7.9$  Hz), 131.3, 128.7, 128.5, 128.4, 127.1, 126.8, 115.2 (d,  $^2J_{\text{C-F}} = 21.2$  Hz);

$^{19}\text{F}$  NMR (376 MHz, acetone- $d_6$ )  $\delta$  -118.51.

HRMS (ESI-TOF) ( $m/z$ ): Calcd for  $\text{C}_{16}\text{H}_{13}\text{FONa}$  ( $[\text{M}+\text{Na}]^+$ ), 263.0843, found 263.0849.

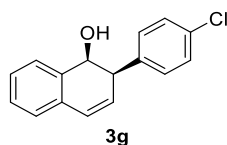

**2-(4-Chlorophenyl)-1,2-dihydronaphthalen-1-ol (3g):** following the general procedure, the reaction of **1a** (0,2 mmol) and 2-(4-chlorophenyl)-5,5-dimethyl-1,3,2-dioxaborinane (67.3 mg, 0.3 mmol) afforded the product **3g** (20.0 mg, 39% yield) as a white solid. mp 113 – 114 °C.

$^1\text{H}$  NMR (600 MHz, DMSO- $d_6$ )  $\delta$  7.29 – 7.24 (m, 3H), 7.22 (m, 2H), 7.19 – 7.13 (m, 3H), 6.70 (dd,  $J$  = 12.0, 6.0 Hz, 1H), 6.08 (dd,  $J$  = 12.0, 6.0 Hz, 1H), 5.21 (d,  $J$  = 6.0 Hz, 1H), 4.87 (t,  $J$  = 6.0 Hz, 1H), 3.77 – 3.71 (m, 1H).

$^{13}\text{C}$  NMR (151 MHz, DMSO- $d_6$ )  $\delta$  138.3, 137.8, 132.9, 131.5, 131.5, 130.7, 128.2, 128.0, 128.0, 127.8, 126.3, 126.2, 69.9, 46.0.

HRMS (ESI-TOF) ( $m/z$ ): Calcd for  $\text{C}_{16}\text{H}_{13}\text{ClONa}$  ( $[\text{M}+\text{Na}]^+$ ), 279.0843, found 279.0845.

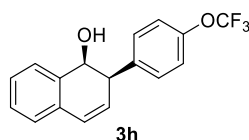

**2-(4-(Trifluoromethoxy)phenyl)-1,2-dihydronaphthalen-1-ol (3h):** following the general procedure, the reaction of **1a** (0,2 mmol) and 5,5-dimethyl-2-(4-(trifluoromethoxy)phenyl)-1,3,2-dioxaborinane (82.2 mg, 0.3 mmol) afforded the product **3h** (28.8 mg, 47% yield) as a yellow oil.

$^1\text{H}$  NMR (400 MHz, Acetone- $d_6$ )  $\delta$  7.35 (d,  $J$  = 6.9 Hz, 1H), 7.20 (dd,  $J$  = 19.3, 8.4 Hz, 4H), 6.97 (t,  $J$  = 8.2 Hz, 2H), 6.71 (d,  $J$  = 9.4 Hz, 1H), 6.10 (dd,  $J$  = 9.7, 4.3 Hz, 1H), 4.97 (t,  $J$  = 6.2 Hz, 1H), 4.02 (d,  $J$  = 6.3 Hz, 1H), 3.82 (t,  $J$  = 5.3 Hz, 1H).

$^{13}\text{C}$  NMR (101 MHz, Acetone- $d_6$ )  $\delta$  148.74, 139.47, 138.24, 133.75, 132.05, 130.87, 128.98, 128.63, 128.49, 127.14, 126.90, 121.50 (q,  $^1J_{\text{C-F}}$  = 255.2 Hz,  $\text{CF}_3$ ), 121.19, 71.33, 47.38.

$^{19}\text{F}$  NMR (376 MHz, Acetone- $d_6$ )  $\delta$  -58.539;

HRMS (ESI-TOF) ( $m/z$ ): Calcd for  $\text{C}_{17}\text{H}_{13}\text{F}_3\text{O}_2\text{Na}$  ( $[\text{M}+\text{Na}]^+$ ), 329.2843, found 263.0847.

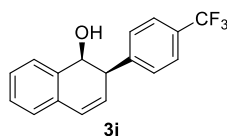

**2-(4-(Trifluoromethyl)phenyl)-1,2-dihydronaphthalen-1-ol (3i):** following the general procedure, the reaction of **1a** (0,2 mmol) and 5,5-dimethyl-2-(4-(trifluoromethyl)phenyl)-1,3,2-dioxaborinane (77.4 mg, 0.3 mmol) afforded the product **3i** (23.8 mg, 41% yield) as a white solid. mp 112–114 °C.

$^1\text{H}$  NMR (400 MHz, Acetone- $d_6$ )  $\delta$  7.35 (d,  $J$  = 6.9 Hz, 1H), 7.20 (dd,  $J$  = 19.3, 8.4 Hz, 4H), 6.97 (t,  $J$  = 8.2 Hz, 2H), 6.71 (d,  $J$  = 9.4 Hz, 1H), 6.10 (dd,  $J$  = 9.7, 4.3 Hz, 1H), 4.97 (t,  $J$  = 6.2 Hz, 1H), 4.02 (d,  $J$  = 6.3 Hz, 1H), 3.82 (t,  $J$  = 5.3 Hz, 1H).

$^{13}\text{C}$  NMR (151 MHz, Acetone- $d_6$ )  $\delta$  145.00, 138.13, 133.70, 131.09, 130.38, 129.20, 129.05 (q,  $^2J_{\text{C-F}}$  = 32.3 Hz), 128.66, 128.53, 127.14, 126.94, 125.58 (q,  $^1J_{\text{C-F}}$  = 270.7 Hz), 125.38 (q,  $^3J_{\text{C-F}}$  = 3.9 Hz), 71.30, 47.87.

$^{19}\text{F}$  NMR (376 MHz, Acetone- $d_6$ )  $\delta$  -62.78.

HRMS (ESI-TOF) (m/z): Calcd for C<sub>17</sub>H<sub>13</sub>F<sub>3</sub>ONa ([M+Na]<sup>+</sup>), 313.2844, found 313.2849.

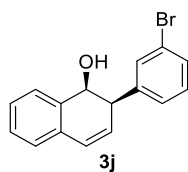

**2-(3-Bromophenyl)-1,2-dihydronaphthalen-1-ol (3j):** following the general procedure, the reaction of **1a** (0,2 mmol) and 2-(3-bromophenyl)-5,5-dimethyl-1,3,2-dioxaborinane (80.7 mg, 0.3 mmol) afforded the product **3j** (22.9 mg, 38% yield) as a colorless oil.

<sup>1</sup>H NMR (400 MHz, DMSO-*d*<sub>6</sub>) δ 7.35 (m, 2H), 7.29 (d, 1H), 7.23 (m, 2H), 7.19 – 7.12 (m, 3H), 6.71 (dd, *J* = 8.0, 4.0 Hz, 1H), 6.08 (dd, *J* = 8.0, 4.0 Hz, 1H), 5.29 (d, *J* = 4.0 Hz, 1H), 4.87 (t, *J* = 4.0 Hz, 1H), 3.78 – 3.73 (m, 1H).

<sup>13</sup>C NMR (151 MHz, DMSO-*d*<sub>6</sub>) δ 142.4, 137.7, 132.9, 132.5, 130.4, 130.2, 129.6, 128.8, 128.4, 128.1, 127.8, 126.4, 126.2, 121.5, 69.9, 46.3.

HRMS (ESI-TOF) (m/z): Calcd for C<sub>16</sub>H<sub>13</sub>BrONa ([M+Na]<sup>+</sup>), 323.0042, found 323.0036.

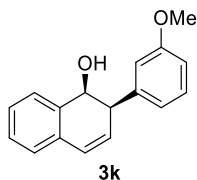

**2-(3-Methoxyphenyl)-1,2-dihydronaphthalen-1-ol (3k):** following the general procedure, the reaction of **1a** (0,2 mmol) and 2-(3-methoxyphenyl)-5,5-dimethyl-1,3,2-dioxaborinane (66.0 mg, 0.3 mmol) afforded the product **3k** (25.2 mg, 50% yield) as a colorless oil.

<sup>1</sup>H NMR (400 MHz, DMSO-*d*<sub>6</sub>) δ 7.31 – 7.28 (m, 1H), 7.25 – 7.20 (m, 2H), 7.17 (m, 1H), 7.11 (m, 1H), 6.75 – 6.71 (m, 3H), 6.67 (dd, *J* = 8.0, 4.0 Hz, 1H), 6.09 (dd, *J* = 8.0, 4.0 Hz, 1H), 5.14 (d, *J* = 4.0 Hz, 1H), 4.88 (t, *J* = 4.0 Hz, 1H), 3.73 – 3.67 (m, 1H), 3.65 (s, 3H).

<sup>13</sup>C NMR (126 MHz, DMSO-*d*<sub>6</sub>) δ 159.2, 141.0, 138.1, 133.1, 131.2, 129.0, 128.0, 127.9, 127.7, 126.3, 126.1, 122.1, 115.8, 111.9, 70.2, 55.2, 46.8.

HRMS (ESI-TOF) (m/z): Calcd for C<sub>17</sub>H<sub>16</sub>O<sub>2</sub>Na ([M+Na]<sup>+</sup>), 275.1043, found 275.1049.

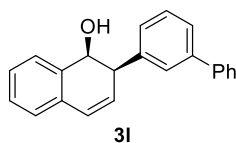

**2-([1,1'-Biphenyl]-3-yl)-1,2-dihydronaphthalen-1-ol (3l):** following the general procedure, the reaction of **1a** (0,2 mmol) and 2-([1,1'-biphenyl]-3-yl)-5,5-dimethyl-1,3,2-dioxaborinane (67.8 mg, 0.3 mmol) afforded the product **3l** (28.0 mg, 47% yield) as a colorless oil.

<sup>1</sup>H NMR (400 MHz, DMSO-*d*<sub>6</sub>) δ 7.55 – 7.50 (m, 2H), 7.47 – 7.40 (m, 4H), 7.35 – 7.18 (m, 6H), 7.13 (s, 1H), 6.72 (dd, *J* = 8.0, 4.0 Hz, 1H), 6.17 (dd, *J* = 8.0, 4.0 Hz, 1H), 5.24 (d, *J* = 4.0 Hz, 1H), 4.93 (t, *J* = 4.0 Hz, 1H), 3.84 – 3.80 (m, 1H).

<sup>13</sup>C NMR (126 MHz, DMSO-*d*<sub>6</sub>) δ 141.0, 140.1, 140.1, 138.1, 133.2, 131.2, 129.4, 128.9, 128.8, 128.5, 128.2, 128.0, 127.8, 127.8, 127.1, 126.5, 126.2, 125.3, 70.3, 46.9.

HRMS (ESI-TOF) (m/z): Calcd for C<sub>22</sub>H<sub>18</sub>ONa ([M+Na]<sup>+</sup>), 321.1250, found 321.1245.

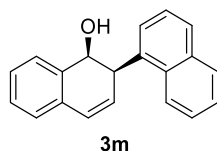

**1',2'-Dihydro-[1,2'-binaphthalen]-1'-ol (3m):** following the general procedure, the reaction of **1a** (0,2 mmol) and 5,5-dimethyl-2-(naphthalen-1-yl)-1,3,2-dioxaborinane (72.0 mg, 0.3 mmol) afforded the product **3m** (31.0 mg, 57% yield) as a colorless oil.

<sup>1</sup>H NMR (600 MHz, DMSO-*d*<sub>6</sub>) δ 8.30 (d, *J* = 12.0 Hz, 1H), 7.95 – 7.91 (m, 1H), 7.82 – 7.78 (m, 1H), 7.53 (m, 2H), 7.41 – 7.37 (m, 2H), 7.36 – 7.22 (m, 4H), 6.77 (dd, *J* = 12.0, 6.0 Hz, 1H), 6.20 (dd, *J* = 12.0, 6.0 Hz, 1H), 4.99 – 4.93 (m, 2H), 4.68 (s, 1H).

<sup>13</sup>C NMR (151 MHz, DMSO-*d*<sub>6</sub>) δ 137.8, 136.2, 133.9, 133.0, 132.4, 131.8, 129.0, 128.1, 127.9, 127.8, 127.4, 127.3, 127.2, 126.4, 126.2, 125.7, 125.6, 124.5, 69.6, 42.2.

HRMS (ESI-TOF) (*m/z*): Calcd for C<sub>20</sub>H<sub>16</sub>ONa ([M+Na]<sup>+</sup>), 295.1250, found 295.1246.

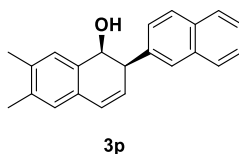

**6,7-Dimethyl-1,2-dihydro-[2,2'-binaphthalen]-1-ol (3p):** following the general procedure, the reaction of 6,7-dimethyl-1,4-dihydro-1,4-epoxynaphthalene (34.4 mg, 0,2 mmol) and 5,5-dimethyl-2-(naphthalen-2-yl)-1,3,2- dioxaborinane (72.0 mg, 0.3 mmol) afforded the product **3p** (38.7 mg, 64% yield) as a yellow solid.mp 110 – 112 °C.

<sup>1</sup>H NMR (400 MHz, Acetone-*d*<sub>6</sub>) δ 7.37 (d, *J* = 8.1 Hz, 2H), 7.18 (d, *J* = 8.1 Hz, 2H), 7.11 (s, 1H), 6.94 (s, 1H), 6.64 (d, *J* = 9.5 Hz, 1H), 5.99 (dd, *J* = 9.5, 4.3 Hz, 1H), 4.90 (t, *J* = 5.5 Hz, 1H), 3.95 (d, *J* = 6.2 Hz, 1H), 3.75 (s, 1H), 2.22 (d, *J* = 7.9 Hz, 6H).

<sup>13</sup>C NMR (101 MHz, Acetone-*d*<sub>6</sub>) δ 139.71, 136.59, 136.17, 135.66, 132.50, 131.55, 131.39, 129.62, 128.85, 128.60, 128.25, 120.73, 71.20, 47.70, 19.70, 19.43.

HRMS (ESI-TOF) (*m/z*): Calcd for C<sub>22</sub>H<sub>20</sub>ONa ([M+Na]<sup>+</sup>), 323.1408, found 323.1406.

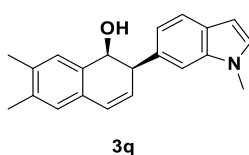

**6,7-Dimethyl-2-(1-methyl-1H-indol-6-yl)-1,2-dihydronaphthalen-1-ol (3q):** following the general procedure, the reaction of 6,7-dimethyl-1,4-dihydro-1,4-epoxynaphthalene (34.4 mg, 0,2 mmol) and 5-(5,5-dimethyl-1,3,2-dioxaborinan-2-yl)-1-methyl-1H-indole (72.9 mg, 0.3 mmol) afforded the product **3q** (34.0 mg, 56% yield) as a yellow solid.mp 97 – 99 °C.

<sup>1</sup>H NMR (400 MHz, Acetone-*d*<sub>6</sub>) δ 7.79 (ddd, *J* = 25.2, 13.7, 7.4 Hz, 4H), 7.43 (dd, *J* = 10.0, 6.2 Hz, 3H), 7.13 (s, 1H), 6.99 (s, 1H), 6.70 (d, *J* = 9.5 Hz, 1H), 6.13 (dd, *J* = 9.5, 4.1 Hz, 1H), 4.97 (d, *J* = 4.6 Hz, 1H), 3.95 (s, 1H), 3.79 (d, *J* = 6.0 Hz, 1H), 2.23 (d, *J* = 14.3 Hz, 6H).

<sup>13</sup>C NMR (101 MHz, Acetone-*d*<sub>6</sub>) δ 137.33, 135.61, 135.33, 135.06, 133.53, 132.70, 130.72, 129.21, 128.20, 127.99, 127.95, 127.86, 127.64, 127.41, 127.15, 125.62, 125.24, 70.71, 47.69, 18.83, 18.60.

HRMS (ESI-TOF) (*m/z*): Calcd for C<sub>21</sub>H<sub>21</sub>NONa ([M+Na]<sup>+</sup>), 326.1516, found 326.1515.

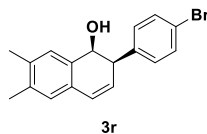

**2-(4-Bromophenyl)-6,7-dimethyl-1,2-dihydronaphthalen-1-ol (3r):** following the general procedure, the reaction of 6,7-dimethyl-1,4-dihydro-1,4-epoxynaphthalene (34.4 mg, 0,2 mmol) and 2-(4-bromophenyl)-5,5-dimethyl-1,3,2-dioxaborinane (80.7 mg, 0.3 mmol) afforded the product **3r** (41.1 mg, 62% yield) as a white solid. mp 132 – 134 °C.

$^1\text{H NMR}$  (400 MHz, Acetone- $d_6$ )  $\delta$  7.43 (s, 1H), 7.29 – 7.01 (m, 4H), 6.95 (s, 1H), 6.63 (d,  $J = 9.5$  Hz, 1H), 6.33 (d,  $J = 2.5$  Hz, 1H), 6.09 (dd,  $J = 9.5, 4.2$  Hz, 1H), 4.90 (s, 1H), 3.84 (s, 1H), 3.77 (s, 3H), 2.25 (t,  $J = 16.6$  Hz, 6H).

$^{13}\text{C NMR}$  (101 MHz, Acetone- $d_6$ )  $\delta$  136.23, 135.36, 135.31, 135.08, 130.91, 130.49, 129.05, 128.95, 128.66, 127.88, 127.26, 127.21, 123.17, 121.21, 108.75, 100.36, 71.01, 47.68, 31.97, 18.84, 18.61. HRMS (ESI-TOF) ( $m/z$ ): Calcd for  $\text{C}_{18}\text{H}_{17}\text{BrONa}$  ( $[\text{M}+\text{Na}]^+$ ), 351.0355, found 351.0351.

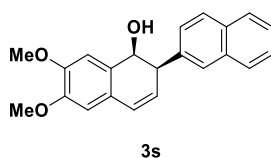

**6,7-Dimethoxy-1,2-dihydro-[2,2'-binaphthalen]-1-ol (3s):** following the general procedure, the reaction of 6,7-dimethoxy-1,4-dihydro-1,4-epoxynaphthalene (34.4 mg, 0,2 mmol) and 5,5-dimethyl-2-(naphthalen-2-yl)-1,3,2-dioxaborinane (72.0 mg, 0.3 mmol) afforded the product **3s** (34.3 mg, 51% yield) as a yellow oil.

$^1\text{H NMR}$  (400 MHz, Acetone- $d_6$ )  $\delta$  7.89 – 7.71 (m, 4H), 7.43 (dd,  $J = 9.6, 6.1$  Hz, 3H), 7.02 (s, 1H), 6.88 (s, 1H), 6.69 (d,  $J = 9.4$  Hz, 1H), 6.09 (dd,  $J = 9.5, 4.0$  Hz, 1H), 4.98 (t,  $J = 5.9$  Hz, 1H), 3.94 (s, 1H), 3.84 (s, 3H), 3.80 (s, 1H), 3.77 (s, 3H).

$^{13}\text{C NMR}$  (101 MHz, Acetone- $d_6$ )  $\delta$  149.90, 149.70, 138.26, 137.33, 134.43, 133.59, 131.74, 131.24, 129.08, 129.03, 128.88, 128.52, 128.29, 128.05, 126.80, 126.51, 126.13, 112.00, 111.51, 71.68, 56.31, 56.17, 48.45.

HRMS (ESI-TOF) ( $m/z$ ): Calcd for  $\text{C}_{22}\text{H}_{20}\text{O}_3\text{Na}$  ( $[\text{M}+\text{Na}]^+$ ), 355.1305, found 355.1313.

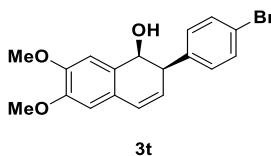

**2-(4-Bromophenyl)-6,7-dimethoxy-1,2-dihydronaphthalen-1-ol (3t):** following the general procedure, the reaction of 6,7-dimethoxy-1,4-dihydro-1,4-epoxynaphthalene (34.4 mg, 0,2 mmol) and 2-(4-bromophenyl)-5,5-dimethyl-1,3,2-dioxaborinane (80.7 mg, 0.3 mmol) afforded the product **3t** (40.0 mg, 55% yield) as a white solid. mp 122 – 124 °C.

$^1\text{H NMR}$  (400 MHz, Acetone- $d_6$ )  $\delta$  7.39 (d,  $J = 8.2$  Hz, 2H), 7.19 (d,  $J = 8.2$  Hz, 2H), 6.99 (s, 1H), 6.83 (s, 1H), 6.63 (d,  $J = 9.4$  Hz, 1H), 5.96 (dd,  $J = 9.5, 4.3$  Hz, 1H), 4.90 (t,  $J = 6.0$  Hz, 1H), 3.91 (d,  $J = 6.4$  Hz, 1H), 3.81 (s, 3H), 3.77 (s, 3H), 3.75 (d,  $J = 3.1$  Hz, 1H).

$^{13}\text{C NMR}$  (101 MHz, Acetone- $d_6$ )  $\delta$  149.97, 149.66, 139.83, 132.53, 131.59, 130.96, 128.64, 128.58, 126.58, 120.74, 111.81, 111.49, 71.30, 56.29, 56.18, 47.60.



HRMS (ESI-TOF) (m/z): Calcd for C<sub>22</sub>H<sub>17</sub>BrO<sub>3</sub>Na ([M+Na]<sup>+</sup>), 383.0253, found 383.0244.

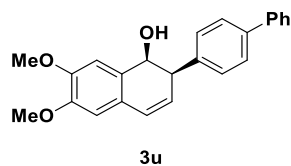

**2-([1,1'-Biphenyl]-4-yl)-6,7-dimethoxy-1,2-dihydronaphthalen-1-ol (3u)** following the general procedure, the reaction of 6,7-dimethoxy-1,4-dihydro-1,4-epoxynaphthalene (34.4 mg, 0,2 mmol) and 2-([1,1'-biphenyl]-4-yl)-5,5-dimethyl-1,3,2-dioxaborinane (79.8 mg, 0.3 mmol) afforded the product **3u** (35.2 mg, 49% yield) as a yellow oil.

<sup>1</sup>H NMR (400 MHz, Acetone-*d*<sub>6</sub>) δ 7.63 (d, *J* = 7.4 Hz, 2H), 7.52 (d, *J* = 8.0 Hz, 2H), 7.43 (t, *J* = 7.5 Hz, 2H), 7.33 (dd, *J* = 13.4, 7.6 Hz, 3H), 7.03 (s, 1H), 6.85 (s, 1H), 6.65 (d, *J* = 9.5 Hz, 1H), 6.03 (dd, *J* = 9.5, 4.3 Hz, 1H), 4.96 (t, *J* = 6.0 Hz, 1H), 3.80 (d, *J* = 18.7 Hz, 8H).

<sup>13</sup>C NMR (101 MHz, Acetone-*d*<sub>6</sub>) δ 149.92, 149.64, 141.81, 140.04, 139.60, 131.25, 130.99, 129.66, 129.13, 128.40, 127.92, 127.57, 127.18, 126.76, 111.86, 111.48, 71.61, 56.31, 56.19, 47.95.

HRMS (ESI-TOF) (m/z): Calcd for C<sub>24</sub>H<sub>22</sub>O<sub>3</sub>Na ([M+Na]<sup>+</sup>), 381.1461, found 381.1452.

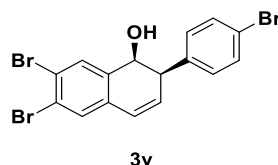

**6,7-Dibromo-2-(4-bromophenyl)-1,2-dihydronaphthalen-1-ol (3v)** following the general procedure, the reaction of 6,7-dibromo-1,4-dihydro-1,4-epoxynaphthalene (63.9 mg, 0,2 mmol) and 2-(4-bromophenyl)-5,5-dimethyl-1,3,2-dioxaborinane (80.7 mg, 0.3 mmol) afforded the product **3v** (9.1 mg, 10% yield) as a yellow oil.

<sup>1</sup>H NMR (400 MHz, Acetone-*d*<sub>6</sub>) δ 7.71 (d, *J* = 2.0 Hz, 1H), 7.52 (s, 1H), 7.41 (d, *J* = 8.1 Hz, 2H), 7.14 (d, *J* = 8.1 Hz, 2H), 6.98 (d, *J* = 9.9 Hz, 1H), 6.37 (dd, *J* = 9.9, 5.0 Hz, 1H), 5.06 (d, *J* = 6.1 Hz, 1H), 4.64 (d, *J* = 6.0 Hz, 1H), 3.86 (t, *J* = 5.9 Hz, 1H).

<sup>13</sup>C NMR (101 MHz, Acetone-*d*<sub>6</sub>) δ 142.74, 137.59, 134.29, 134.17, 132.40, 132.08, 131.83, 129.53, 126.35, 122.14, 121.91, 121.28, 71.00, 46.45.

HRMS (ESI-TOF) (m/z): Calcd for C<sub>16</sub>H<sub>11</sub>Br<sub>3</sub>ONa ([M+Na]<sup>+</sup>), 480.7361, found 480.7359.

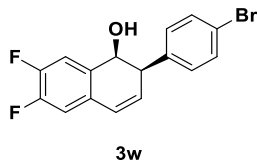

**2-(4-Bromophenyl)-6,7-difluoro-1,2-dihydronaphthalen-1-ol (3w)** following the general procedure, the reaction of 6,7-difluoro-1,4-dihydro-1,4-epoxynaphthalene (36.0 mg, 0,2 mmol) and 2-(4-bromophenyl)-5,5-dimethyl-1,3,2-dioxaborinane (80.7 mg, 0.3 mmol) afforded the product **3w** (6.8 mg, 10% yield) as a yellow oil.

<sup>1</sup>H NMR (400 MHz, Acetone-*d*<sub>6</sub>) δ 7.42 (d, *J* = 8.1 Hz, 2H), 7.25 – 7.09 (m, 4H), 6.92 (dd, *J* = 9.8, 1.9 Hz, 1H), 6.31 (dd, *J* = 9.8, 4.4 Hz, 1H), 4.97 (t, *J* = 6.0 Hz, 1H), 4.36 (d, *J* = 6.1 Hz, 1H), 3.88 (d, *J* = 5.7 Hz, 1H).

$^{13}\text{C}$  NMR (101 MHz, Acetone- $d_6$ )  $\delta$  150.66 (dd,  $J_{\text{C-F}} = 245.4$  Hz, 13.1 Hz), 146.55 (dd,  $J_{\text{C-F}} = 248.5$  Hz, 13.6 Hz), 138.57, 135.36, 135.34, 133.75, 132.45, 131.78, 123.42-123.22 (m), 121.11, 119.80 (dd,  $J_{\text{C-F}} = 4.4$  Hz, 3.3 Hz), 116.17 (d,  $J_{\text{C-F}} = 17.4$  Hz), 70.38 (d,  $J_{\text{C-F}} = 3.0$  Hz), 47.16.  
 $^{19}\text{F}$  NMR (376 MHz, Acetone- $d_6$ )  $\delta$  -142.09 (d,  $J = 19.9$  Hz), -149.44 (d,  $J = 19.9$  Hz).  
HRMS (ESI-TOF) (m/z): Calcd for  $\text{C}_{16}\text{H}_{11}\text{BrF}_2\text{ONa}$  ( $[\text{M}+\text{Na}]^+$ ), 359.3820, found 359.3826.

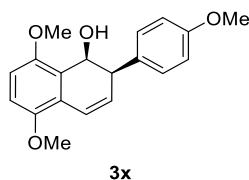

**5,8-Dimethoxy-2-(4-methoxyphenyl)-1,2-dihydronaphthalen-1-ol (3x)** following the general procedure, the reaction of 5,8-dimethoxy-1,4-dihydro-1,4-epoxynaphthalene (40.8 mg, 0.2 mmol) and 2-(4-methoxyphenyl)-5,5-dimethyl-1,3,2-dioxaborinane (66.0 mg, 0.3 mmol) afforded the product **3x** (22.9 mg, 36% yield) as a yellow oil.

$^1\text{H}$  NMR (400 MHz, Acetone- $d_6$ )  $\delta$  7.41 (d,  $J = 7.3$  Hz, 1H), 7.25 (t,  $J = 7.7$  Hz, 1H), 7.01 (dd,  $J = 9.8, 5.4$  Hz, 2H), 6.95 (t,  $J = 7.5$  Hz, 1H), 6.92 – 6.84 (m, 2H), 6.02 (d,  $J = 9.8$  Hz, 1H), 5.06 (t,  $J = 5.0$  Hz, 1H), 4.16 (s, 1H), 3.85 (s, 3H), 3.82 (s, 3H), 3.77 (s, 3H).

$^{13}\text{C}$  NMR (101 MHz, Acetone- $d_6$ )  $\delta$  158.06, 151.81, 150.41, 131.90, 130.84, 130.20, 128.42, 126.72, 123.26, 122.42, 121.07, 111.82, 111.68, 111.04, 62.32, 56.44, 56.39, 55.87, 41.19.

HRMS (ESI-TOF) (m/z): Calcd for  $\text{C}_{19}\text{H}_{20}\text{O}_4\text{Na}$  ( $[\text{M}+\text{Na}]^+$ ), 335.0443, found 335.0449.

## 2.2 Preliminary asymmetric studies with chiral ligands.

**Table S1.** Preliminary asymmetric studies with chiral ligands.

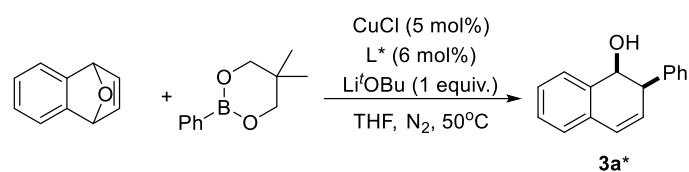

| Entry    | Ligand                              | Yield/% <sup>a</sup> | ee/% <sup>b</sup> |
|----------|-------------------------------------|----------------------|-------------------|
| 1        | ( <i>R</i> )-BINAP                  | 0                    | 0                 |
| 2        | ( <i>R,R</i> )-Me-DuPhos            | 43                   | 20                |
| 3        | ( <i>R</i> )-SegPhos                | 52                   | 14                |
| 4        | ( <i>R</i> )-tol-BINAP              | 45                   | 15                |
| 5        | ( <i>R,R</i> )- <i>i</i> -Pr-DuPhos | 0                    | 0                 |
| 6        | ( <i>R,S</i> )-N-PINAP              | 0                    | nd                |
| 7        | ( <i>R,R</i> )- <i>t</i> -Bu-BOX    | 28                   | 2                 |
| 8        | ( <i>R,R</i> )-Ph-BOX               | 0                    | 0                 |
| <b>9</b> | <b>(<i>R</i>)-QUINAP</b>            | <b>57</b>            | <b>23</b>         |

<sup>a</sup> Isolated yields after column chromatography. <sup>b</sup> Determined by HPLC on a chiral stationary phase.

*The procedure for the asymmetric catalysis.*

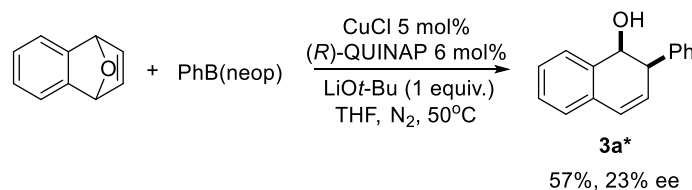

In a N<sub>2</sub> filled glove box, a 25 mL pressure tube was charged successfully with CuCl (5 mol%), (*R*)-Quinap (mg, 6 mol%), and anhydrous THF (2 mL). After stirring for 15 min, LiOt-Bu (1 equiv.) **2a** (1.5 equiv.) and **1a** (1.0 equiv.) were sequentially added with stirring. The tube was sealed, taken out of the glove box and placed in a 50°C oil bath to react for 24 h, at which time the mixture was added saturated Na<sub>2</sub>CO<sub>3</sub> and extracted with DCM (10 mL x 3). The organic phases were combined, and the solvent was removed in vacuo. The residue was subjected to flash chromatography to obtain the enantio-enriched product **3a\*** (25.3 mg, 57% yield, 23% ee) as a yellow oil.

### 3. Computational Details.

The calculation was performed with Gaussian 16 software package.<sup>7</sup> Geometry optimizations were performed using b3lyp hybrid functional<sup>8</sup> with Grimme's DFT-D3(BJ) correction for dispersion effects.<sup>9</sup> 6-31G(d) basis set was used for C, H, O, B and P atoms, and SDD pseudopotential basis set for Cu, with SMD solvation model in THF. Stationary points were checked with frequency calculation at the same level of theory to obtain thermal corrections for Gibbs free energy and to check if the structures are minima (no imaginary frequencies) or transition states (only one imaginary frequency). Intrinsic reaction coordinate (IRC) calculations were performed to check the transition structures indeed connect the starting material and product structures. Single point energy calculations were calculated with M06 functional<sup>10</sup> with DFT-D3 dispersion correction, using 6-311+G(d,p) basis set for C, H, O, B and P atoms, and SDD pseudopotential basis set for Cu, with SMD solvation model in THF. Structures were drawn and visualized with Chemdraw and Cylview<sup>11</sup> softwares.

**Table S2.** Computed single point energies for all starting materials, products, intermediates and transition structures.

| Geometry               | $E_{\text{sol}}^a/\text{a.u.}$ | Correction <sup>b</sup> /a.u.  | $G_{\text{sol}}(\text{final})^c/\text{a.u.}$ |
|------------------------|--------------------------------|--------------------------------|----------------------------------------------|
| NBE                    | -460.8268152                   | 0.12057                        | -460.7062452                                 |
| <b>II</b>              | -2268.691116                   | 0.465503                       | -2268.2256129                                |
|                        |                                | Total (NBE+PhCuL)              | -2728.9318581                                |
| <b>III</b>             | -604.8625476                   | 0.242423                       | -604.6201246                                 |
|                        |                                | Total (NBE+PhCuL+ <b>III</b> ) | -3333.5519827                                |
| Ph-Bneop               | -603.3639956                   | 0.207205                       | -603.1567906                                 |
|                        |                                | Total (NBE+PhB)                | -1063.863036                                 |
| <b>IV_a</b>            | -2729.538434                   | 0.612034                       | -2728.9264004                                |
| <b>TS<sub>4</sub></b>  | -2729.511902                   | 0.61492                        | -2728.8969819                                |
| <b>IV</b>              | -2729.584614                   | 0.61772                        | -2728.9668941                                |
| <b>TS<sub>45</sub></b> | -2729.532201                   | 0.612385                       | -2728.9198162                                |
| <b>V</b>               | -2729.622709                   | 0.615327                       | -2729.0073819                                |
| <b>VII</b>             | -3334.452429                   | 0.88531                        | -3333.567119                                 |
| <b>TS<sub>78</sub></b> | -3334.423291                   | 0.883012                       | -3333.540279                                 |
| <b>VIII</b>            | -3334.498323                   | 0.886914                       | -3333.611409                                 |
| <b>IX</b>              | -3334.5165738                  | 0.888176                       | -3333.6283978                                |
| <b>VI</b>              | -1064.300798                   | 0.350882                       | -1063.949916                                 |

<sup>a</sup> Electronic energy calculated on SMD(THF)-M06-D3/6-311+G(d,p)-Cu(SDD) level of theory.

<sup>b</sup> Thermal correction to Gibbs free energy obtained from frequency calculation on SMD(THF)-b3lyp-D3(BJ)/6-31G(d)-Cu(SDD) level of theory. <sup>c</sup> Final Gibbs free energy obtained by adding the first two terms.

(A)

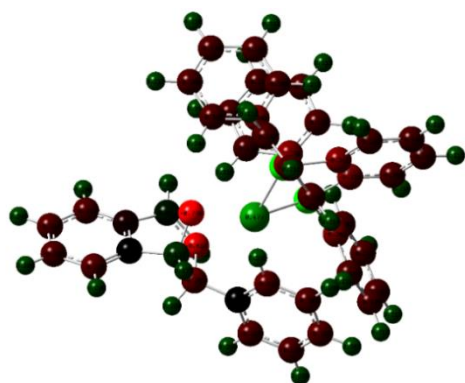

(B)

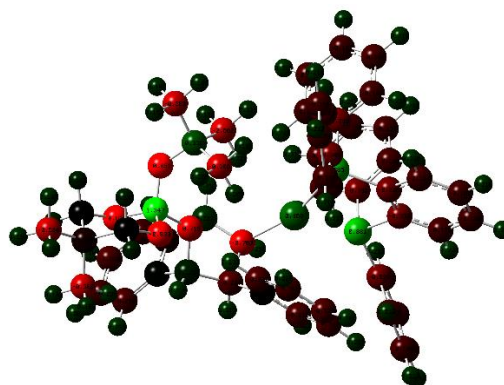

**Figure S1.** Natural population analysis of **TS<sub>45</sub>** (A) and **TS<sub>78</sub>** (B), calculated at SMD(THF)-M06-D3/6-311G(d)-Cu/SDD level of theory.

**Structures and Cartesian coordinates of all stationary points and transition structures.**

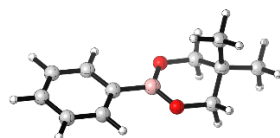

**Ph-Bneop**

|   |             |             |             |   |             |             |             |
|---|-------------|-------------|-------------|---|-------------|-------------|-------------|
| C | 3.66173800  | 1.20932100  | -0.10659600 | H | -2.31481500 | 1.30438100  | 1.55710100  |
| C | 2.27463300  | 1.20454000  | 0.04085300  | H | -2.43075900 | -2.14932000 | 0.00082000  |
| C | 1.55425800  | -0.00019600 | 0.11699500  | H | -2.31605600 | -1.30541100 | 1.55668800  |
| C | 2.27491400  | -1.20474100 | 0.04036700  | B | -0.00196200 | -0.00019500 | 0.28074200  |
| C | 3.66202900  | -1.20914500 | -0.10701800 | O | -0.65242300 | 1.20220400  | 0.34188500  |
| C | 4.35823600  | 0.00019400  | -0.18076100 | O | -0.65279200 | -1.20219100 | 0.34285400  |
| H | 4.20072300  | 2.15155700  | -0.16385600 | C | -2.59865200 | 0.00009900  | -1.65239900 |
| H | 1.73632900  | 2.14675100  | 0.09810200  | H | -3.07464900 | -0.88651800 | -2.08701500 |
| H | 1.73689100  | -2.14714800 | 0.09719100  | H | -3.07316100 | 0.88768800  | -2.08673400 |
| H | 4.20127000  | -2.15121700 | -0.16452400 | H | -1.54815500 | -0.00068400 | -1.96077000 |
| H | 5.43911800  | 0.00032300  | -0.29590200 | C | -4.24124000 | 0.00029800  | 0.25295600  |
| C | -2.07859300 | 1.23294100  | 0.48734600  | H | -4.74415500 | 0.88578500  | -0.15316000 |
| C | -2.07899200 | -1.23326300 | 0.48717300  | H | -4.74447100 | -0.88511400 | -0.15296900 |
| C | -2.75595200 | -0.00002000 | -0.12374300 | H | -4.37992900 | 0.00042800  | 1.34058600  |
| H | -2.43091300 | 2.14920200  | 0.00178600  |   |             |             |             |

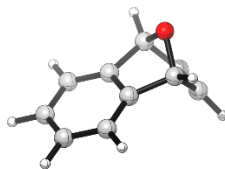

**NBE**

|   |            |          |           |   |           |           |           |
|---|------------|----------|-----------|---|-----------|-----------|-----------|
| C | 0.951984   | -1.9863  | 0.667472  | H | -0.772162 | -1.489682 | 2.051494  |
| C | -0.345696, | -1.26346 | 1.075603  | H | -0.772162 | -1.489682 | -2.051494 |
| C | -0.345696  | -1.26346 | -1.075603 | O | -1.227701 | -1.67433, | 0.        |
| C | 0.951984   | -1.9863  | -0.667472 | H | 1.719626  | -2.3218   | 1.354025  |
| C | -0.159768  | 0.21572  | -0.703532 | H | 1.719626  | -2.3218   | -1.354025 |

|   |          |          |          |   |           |          |           |
|---|----------|----------|----------|---|-----------|----------|-----------|
| C | 0.003429 | 1.383562 | 1.420221 | H | 0.283188  | 3.519933 | -1.234341 |
| H | 0.005582 | 1.389966 | 2.507103 | C | 0.003429  | 1.383562 | -1.420221 |
| C | 0.16248  | 2.583628 | 0.69633  | H | 0.005582  | 1.389966 | -2.507103 |
| H | 0.283188 | 3.519933 | 1.234341 | C | -0.159768 | 0.21572  | 0.703532  |
| C | 0.16248  | 2.583628 | -0.69633 |   |           |          |           |

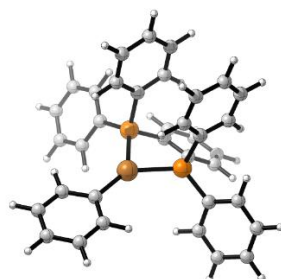

**PhCu(dppbz)**

|    |             |             |             |   |             |             |             |
|----|-------------|-------------|-------------|---|-------------|-------------|-------------|
| C  | -1.09030200 | 4.04373400  | 1.15839800  | H | 6.70257100  | 0.76111200  | -2.55878900 |
| C  | 0.08571600  | 3.29607200  | 0.90745700  | C | 1.75858800  | -1.43243100 | 1.00489100  |
| C  | 1.29690000  | 3.98977700  | 1.14502100  | C | 2.22031600  | -0.95639100 | 2.24320700  |
| C  | 1.34001000  | 5.31384100  | 1.59655100  | C | 1.42072300  | -2.78508000 | 0.87164000  |
| C  | 0.15223300  | 6.01088800  | 1.83240500  | C | 2.35251100  | -1.82411000 | 3.32598300  |
| C  | -1.06843700 | 5.36861300  | 1.60903100  | H | 2.46735500  | 0.09618700  | 2.35762600  |
| H  | -2.06215800 | 3.57683000  | 0.99520300  | C | 1.53965000  | -3.64809400 | 1.96238400  |
| H  | 2.24508600  | 3.48019600  | 0.97041600  | H | 1.04966700  | -3.16125000 | -0.07578000 |
| H  | 2.29837700  | 5.80253800  | 1.76499700  | C | 2.00633300  | -3.17117800 | 3.18864800  |
| H  | 0.17745800  | 7.04006300  | 2.18347800  | H | 2.71158600  | -1.44669600 | 4.27936100  |
| H  | -2.00182200 | 5.90018800  | 1.78748800  | H | 1.26127800  | -4.69242300 | 1.85368700  |
| C  | 0.62501500  | -1.11282800 | -1.65568800 | H | 2.09319800  | -3.84464100 | 4.03665200  |
| C  | -0.78949200 | -1.06196200 | -1.62759300 | C | -1.77469400 | -1.45110300 | 1.04022300  |
| C  | 1.26908700  | -1.80175900 | -2.69081400 | C | -1.46228900 | -1.12652900 | 2.36796100  |
| C  | -1.52357100 | -1.69344400 | -2.63869700 | C | -2.15891900 | -2.76268600 | 0.72349300  |
| C  | 0.52605100  | -2.43182200 | -3.69005500 | C | -1.53482500 | -2.09924000 | 3.36575100  |
| H  | 2.35349000  | -1.83890200 | -2.72037800 | H | -1.14191800 | -0.11718200 | 2.61174400  |
| C  | -0.86936400 | -2.37571500 | -3.66544500 | C | -2.23942500 | -3.73099700 | 1.72364200  |
| H  | -2.60808900 | -1.64453400 | -2.62709800 | H | -2.38151600 | -3.02937900 | -0.30517200 |
| H  | 1.03686900  | -2.96018800 | -4.48997100 | C | -1.92528900 | -3.40073800 | 3.04489300  |
| H  | -1.44866100 | -2.85949500 | -4.44675700 | H | -1.27561300 | -1.84295100 | 4.38877800  |
| Cu | 0.03606100  | 1.43850700  | 0.31419500  | H | -2.53661100 | -4.74505800 | 1.47098800  |
| P  | 1.52760300  | -0.20493200 | -0.33324300 | H | -1.97527200 | -4.15974200 | 3.82059200  |
| P  | -1.56815100 | -0.14813500 | -0.22984500 | C | -3.24859200 | 0.23646100  | -0.84435700 |
| C  | 3.20351400  | 0.05250400  | -1.02064900 | C | -3.36304200 | 1.29571500  | -1.76091500 |
| C  | 4.24423000  | -0.87424000 | -0.86390300 | C | -4.40467200 | -0.43235000 | -0.42165800 |
| C  | 3.43788900  | 1.24095900  | -1.72918300 | C | -4.61033300 | 1.66218700  | -2.26240600 |
| C  | 5.49964600  | -0.61720200 | -1.41712600 | H | -2.47219800 | 1.83304200  | -2.07757600 |
| H  | 4.07329000  | -1.79221200 | -0.30992100 | C | -5.65486300 | -0.05464100 | -0.91796900 |
| C  | 4.69122800  | 1.49108800  | -2.28788900 | H | -4.33301000 | -1.24512700 | 0.29335200  |
| H  | 2.63766600  | 1.96956900  | -1.83481800 | C | -5.76018200 | 0.98753600  | -1.84036700 |
| C  | 5.72379200  | 0.56266000  | -2.13112800 | H | -4.68689000 | 2.47956300  | -2.97399400 |
| H  | 6.30227800  | -1.33860200 | -1.29093100 | H | -6.54587300 | -0.57860300 | -0.58305700 |
| H  | 4.86474400  | 2.41337400  | -2.83516600 | H | -6.73367300 | 1.27867700  | -2.22470700 |

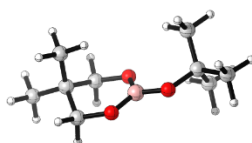

***t*-BuOBneop (III)**

|   |             |            |             |   |             |             |             |
|---|-------------|------------|-------------|---|-------------|-------------|-------------|
| C | -2.51148000 | 0.11148500 | 0.07499300  | C | -2.09117100 | -1.30412400 | -0.34018000 |
| C | -1.58202300 | 1.08363000 | -0.65998500 | H | -1.77756300 | 1.04866100  | -1.74009900 |

|   |             |             |             |   |             |             |             |
|---|-------------|-------------|-------------|---|-------------|-------------|-------------|
| H | -1.74835400 | 2.11171700  | -0.32064600 | C | 2.77603000  | 0.75418600  | -1.31134100 |
| H | -2.31377100 | -1.46309800 | -1.40449000 | H | 3.68100300  | 1.37206900  | -1.32288600 |
| H | -2.64705800 | -2.05421900 | 0.23338600  | H | 2.86474500  | 0.00367700  | -2.10512800 |
| B | 0.19044000  | -0.50782300 | -0.19141600 | H | 1.91662600  | 1.39287700  | -1.52913700 |
| O | 1.49540000  | -0.84259400 | 0.01852200  | O | -0.70041600 | -1.55124000 | -0.11982700 |
| C | 2.61959700  | 0.06841300  | 0.04929600  | O | -0.19786500 | 0.78795800  | -0.43852000 |
| C | 3.82984300  | -0.82211300 | 0.33683400  | C | -2.38397600 | 0.28995100  | 1.59581700  |
| H | 3.94524500  | -1.57648100 | -0.44917100 | H | -2.67591200 | 1.30510600  | 1.88916300  |
| H | 4.74703300  | -0.22517900 | 0.38198100  | H | -3.03651700 | -0.41660200 | 2.12171600  |
| H | 3.70523800  | -1.34026000 | 1.29398300  | H | -1.36067100 | 0.12300400  | 1.94698600  |
| C | 2.43183700  | 1.08987000  | 1.17522600  | C | -3.95721400 | 0.36150800  | -0.36632200 |
| H | 1.56841000  | 1.73130400  | 0.98221200  | H | -4.64063900 | -0.33796200 | 0.12927600  |
| H | 2.27896400  | 0.57537200  | 2.13086100  | H | -4.27303100 | 1.37837500  | -0.10493700 |
| H | 3.32191100  | 1.72255000  | 1.26626800  | H | -4.07347400 | 0.23839100  | -1.44969100 |

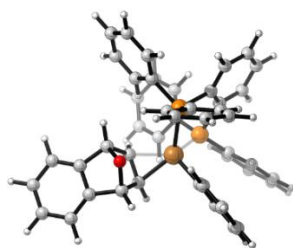

**PhCuL-NBE complex (IV\_a)**

|    |             |             |             |   |             |             |             |
|----|-------------|-------------|-------------|---|-------------|-------------|-------------|
| C  | -0.17281100 | -2.93157000 | -2.12523200 | C | 0.43988300  | 4.89076300  | 0.19504400  |
| C  | 0.28759000  | -1.59817800 | -2.18274900 | H | 0.65394800  | 3.43517200  | -1.37422700 |
| C  | 1.10746700  | -1.28939300 | -3.29015500 | C | 1.21270100  | 4.21163300  | 2.38117300  |
| C  | 1.46525700  | -2.23595900 | -4.25763100 | H | 2.06300000  | 2.24240900  | 2.51820900  |
| C  | 1.00000600  | -3.54987400 | -4.15627900 | C | 0.62851000  | 5.17033700  | 1.55201400  |
| C  | 0.17274000  | -3.89233600 | -3.08344400 | H | -0.01577500 | 5.63036900  | -0.45739300 |
| H  | -0.82000200 | -3.23966800 | -1.30732200 | H | 1.35997000  | 4.42056500  | 3.43722600  |
| H  | 1.49327600  | -0.27675500 | -3.40294000 | H | 0.31855400  | 6.12867100  | 1.95893800  |
| H  | 2.10772600  | -1.94831800 | -5.08867700 | C | -0.96655000 | -0.37549800 | 2.74156200  |
| H  | 1.27499000  | -4.29267900 | -4.90178300 | C | -1.37834900 | -1.13856400 | 3.84308400  |
| H  | -0.20351900 | -4.91000200 | -2.98965300 | C | -1.16874800 | 1.01329800  | 2.75843500  |
| C  | 2.47999300  | 0.08397600  | 1.16977700  | C | -1.99037500 | -0.52182700 | 4.93592000  |
| C  | 1.67006800  | -0.84969900 | 1.84551000  | H | -1.22539300 | -2.21265400 | 3.84941600  |
| C  | 3.79978900  | 0.28901600  | 1.60207900  | C | -1.76687400 | 1.62939600  | 3.85728800  |
| C  | 2.18483000  | -1.53980800 | 2.95298300  | H | -0.85185400 | 1.61068500  | 1.91097500  |
| C  | 4.30666500  | -0.41472100 | 2.69198700  | C | -2.18433400 | 0.86156500  | 4.94718800  |
| H  | 4.42861000  | 1.00585300  | 1.08348800  | H | -2.31041000 | -1.12367100 | 5.78214000  |
| C  | 3.49599900  | -1.32903600 | 3.37204700  | H | -1.90931600 | 2.70655500  | 3.85770100  |
| H  | 1.55689800  | -2.24920900 | 3.48333600  | H | -2.65858500 | 1.33807500  | 5.80058900  |
| H  | 5.32988700  | -0.24640100 | 3.01561900  | C | -0.37084300 | -2.87241600 | 1.36037700  |
| H  | 3.88549300  | -1.87451200 | 4.22689000  | C | 0.66462500  | -3.79432800 | 1.15033500  |
| Cu | -0.22865700 | -0.22317300 | -0.84733400 | C | -1.69658100 | -3.33576100 | 1.40874300  |
| P  | 1.76574600  | 1.04236200  | -0.23397700 | C | 0.38227600  | -5.15464000 | 1.01633200  |
| P  | -0.07342400 | -1.07209900 | 1.29199300  | H | 1.69135700  | -3.45205200 | 1.07810300  |
| C  | 3.24658200  | 1.30452500  | -1.28954000 | C | -1.97460900 | -4.69565600 | 1.27818800  |
| C  | 3.79565300  | 2.56360700  | -1.56546900 | H | -2.51264300 | -2.63165300 | 1.53854900  |
| C  | 3.82327400  | 0.16397700  | -1.87593800 | C | -0.93553200 | -5.60982700 | 1.08183900  |
| C  | 4.89845100  | 2.68060000  | -2.41563700 | H | 1.19509000  | -5.85689900 | 0.85356200  |
| H  | 3.37067600  | 3.45437600  | -1.11510600 | H | -3.00408900 | -5.04000800 | 1.32223800  |
| C  | 4.92781200  | 0.28383300  | -2.71664400 | H | -1.15379600 | -6.66860100 | 0.97463900  |
| H  | 3.40289700  | -0.81673500 | -1.67549000 | C | -1.77782700 | 1.25717100  | -0.68264100 |
| C  | 5.46730000  | 1.54407300  | -2.99217400 | C | -3.07257700 | 0.65616800  | -0.10515400 |
| H  | 5.31580700  | 3.66300900  | -2.61963500 | C | -2.93373300 | -0.17015600 | -2.09969200 |
| H  | 5.36360000  | -0.60665300 | -3.16123300 | C | -1.69439700 | 0.73166300  | -1.96332600 |
| H  | 6.32534900  | 1.63757000  | -3.65195700 | C | -4.13492600 | 0.77870500  | -2.16758400 |
| C  | 1.42402400  | 2.68633800  | 0.50299100  | H | -3.16047000 | 0.56989200  | 0.97489000  |
| C  | 0.82276600  | 3.65413700  | -0.32266700 | H | -2.88521700 | -0.99726500 | -2.80424700 |
| C  | 1.61334300  | 2.97852900  | 1.86098900  | O | -3.07744500 | -0.64837200 | -0.73731200 |

|   |             |            |             |   |             |            |             |
|---|-------------|------------|-------------|---|-------------|------------|-------------|
| H | -1.36477100 | 2.19893700 | -0.34481700 | C | -5.99010100 | 2.12653600 | -2.84628300 |
| H | -1.20165800 | 1.17826800 | -2.81945500 | H | -6.69327800 | 2.44577100 | -3.61071700 |
| C | -5.18164500 | 2.26100100 | -0.54950800 | C | -5.00135000 | 1.17416700 | -3.16791800 |
| H | -5.25356600 | 2.68288600 | 0.44976100  | H | -4.93471300 | 0.76513400 | -4.17274300 |
| C | -6.07850300 | 2.65987600 | -1.56173600 | C | -4.22392500 | 1.31840100 | -0.86899700 |
| H | -6.85035500 | 3.39033500 | -1.33487100 |   |             |            |             |

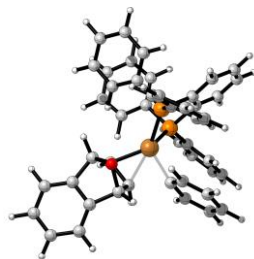

TS<sub>4</sub>

|    |             |             |             |   |             |             |             |
|----|-------------|-------------|-------------|---|-------------|-------------|-------------|
| C  | 1.66386400  | -0.63686600 | -2.78990100 | H | -4.18251600 | 1.58660300  | 3.80996100  |
| C  | 1.24071200  | -1.49674200 | -1.76301100 | H | -2.91560200 | 0.54740200  | 5.67999900  |
| C  | 0.72960700  | -2.75134600 | -2.13139600 | C | -0.51367700 | 2.58415800  | 1.02621100  |
| C  | 0.59583000  | -3.11890000 | -3.47309100 | C | -1.21893900 | 3.79741300  | 1.01215200  |
| C  | 0.99492200  | -2.23722100 | -4.48309900 | C | -0.05861300 | 2.06736200  | 2.24603500  |
| C  | 1.53533600  | -0.99556300 | -4.13551900 | C | -1.46449000 | 4.48004100  | 2.20239200  |
| H  | 2.08498200  | 0.33284000  | -2.54033500 | H | -1.57971600 | 4.20583900  | 0.07290400  |
| H  | 0.41879900  | -3.45196100 | -1.35772700 | C | -0.30746300 | 2.75147500  | 3.43784900  |
| H  | 0.18027400  | -4.09109400 | -3.73023100 | H | 0.46407200  | 1.11588400  | 2.25107200  |
| H  | 0.89651100  | -2.51984800 | -5.52805200 | C | -1.01071900 | 3.95636300  | 3.41764800  |
| H  | 1.85429800  | -0.30227500 | -4.91115200 | H | -2.01380300 | 5.41739000  | 2.18414800  |
| C  | -2.65704100 | 0.19535500  | -0.74469400 | H | 0.03884700  | 2.33579900  | 4.37963400  |
| C  | -1.97714100 | 1.37788900  | -1.11310300 | H | -1.21024500 | 4.48666400  | 4.34485300  |
| C  | -3.97951700 | -0.00178600 | -1.16361600 | C | 0.51487100  | 2.74383900  | -1.68662700 |
| C  | -2.63877600 | 2.33519100  | -1.89313000 | C | 0.41467000  | 2.48639100  | -3.06486700 |
| C  | -4.62333100 | 0.95479100  | -1.94836300 | C | 1.32941800  | 3.79835100  | -1.24857700 |
| H  | -4.50527000 | -0.90726900 | -0.87805300 | C | 1.09868200  | 3.28160300  | -3.98311400 |
| C  | -3.95194800 | 2.12400200  | -2.31320400 | H | -0.19794800 | 1.66363400  | -3.41911500 |
| H  | -2.12167300 | 3.24324600  | -2.18530400 | C | 2.01752800  | 4.58865300  | -2.17097300 |
| H  | -5.64669100 | 0.78800700  | -2.27234800 | H | 1.42535900  | 4.00426000  | -0.18717000 |
| H  | -4.44959100 | 2.87187100  | -2.92414700 | C | 1.90266200  | 4.33520000  | -3.53919600 |
| Cu | 0.45689400  | -0.54562300 | -0.05603100 | H | 1.00562100  | 3.07553700  | -5.04593100 |
| P  | -1.75738100 | -1.02276900 | 0.30158200  | H | 2.64196400  | 5.40464800  | -1.81770800 |
| P  | -0.25026500 | 1.58703300  | -0.49664100 | H | 2.43731100  | 4.95258100  | -4.25557000 |
| C  | -2.63758900 | -2.59594900 | -0.02467800 | C | 1.94808000  | -0.93716500 | 1.26855500  |
| C  | -3.30098600 | -3.32192800 | 0.97334400  | C | 3.04447300  | 0.13059100  | 1.44605000  |
| C  | -2.57887300 | -3.11775000 | -1.32897500 | C | 3.61723800  | -0.84391400 | -0.40106000 |
| C  | -3.89546700 | -4.54978200 | 0.67210200  | C | 2.32870400  | -1.58659800 | 0.00714100  |
| H  | -3.35808600 | -2.93060200 | 1.98377800  | C | 4.68417100  | -1.26975400 | 0.59829700  |
| C  | -3.18112000 | -4.33840000 | -1.62706200 | H | 2.80719500  | 1.02274400  | 2.02615700  |
| H  | -2.06286600 | -2.56623400 | -2.10855400 | H | 3.89036200  | -0.84103300 | -1.45329000 |
| C  | -3.83872000 | -5.05998400 | -0.62583200 | O | 3.32668000  | 0.49459500  | 0.06542100  |
| H  | -4.40886800 | -5.10290500 | 1.45388100  | H | 1.74510800  | -1.58721000 | 2.11777500  |
| H  | -3.13324600 | -4.72838900 | -2.64008400 | H | 2.33540100  | -2.67099200 | -0.05082700 |
| H  | -4.30387600 | -6.01401200 | -0.85761300 | C | 5.06252100  | -0.80861000 | -2.95261200 |
| C  | -2.23344100 | -0.54928400 | 2.00906000  | H | 4.79507700  | -0.31412900 | 3.88340100  |
| C  | -1.51346500 | -1.12424300 | 3.06909800  | C | 6.17955900  | -1.66401700 | 2.89547900  |
| C  | -3.20208300 | 0.42310700  | 2.28921300  | H | 6.78164600  | -1.81728200 | 3.78745800  |
| C  | -1.76951800 | -0.74369600 | 4.38538700  | C | 6.52768800  | -2.31316100 | 1.71036600  |
| H  | -0.74052000 | -1.85755300 | 2.85748800  | H | 7.39617000  | -2.96596700 | 1.68855500  |
| C  | -3.44180900 | 0.81837000  | 3.60649200  | C | 5.76724500  | -2.12704500 | 0.53939200  |
| H  | -3.75502600 | 0.88915300  | 1.48094100  | H | 6.03570600  | -2.64010600 | -0.38090600 |
| C  | -2.72972000 | 0.23577500  | 4.65595700  | C | 4.32848000  | -0.61534100 | 1.79426600  |
| H  | -1.20871800 | -1.19813800 | 5.19747500  |   |             |             |             |



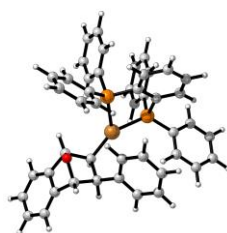

IV

|    |             |             |             |   |             |             |             |
|----|-------------|-------------|-------------|---|-------------|-------------|-------------|
| C  | 1.71081100  | -1.30507000 | -1.92672100 | H | -5.41309100 | 1.64312100  | 2.25453000  |
| C  | 2.37780900  | -2.13173000 | -1.00513200 | H | -4.71025300 | 1.29123200  | 4.61288600  |
| C  | 2.32386300  | -3.51676500 | -1.20450800 | C | -1.40505000 | 2.66131400  | 0.47848800  |
| C  | 1.60799300  | -4.06721200 | -2.27342700 | C | -2.44324900 | 3.49422500  | 0.03578100  |
| C  | 0.92625700  | -3.23571300 | -3.16294800 | C | -1.07943800 | 2.63212800  | 1.84119700  |
| C  | 0.98656900  | -1.84881900 | -2.98693000 | C | -3.14406000 | 4.28490000  | 0.94518800  |
| H  | 1.78031600  | -0.23037100 | -1.80307900 | H | -2.70902900 | 3.51667700  | -1.01689000 |
| H  | 2.84077500  | -4.17329400 | -0.50794800 | C | -1.78342600 | 3.42250000  | 2.75126100  |
| H  | 1.57626800  | -5.14622000 | -2.40232500 | H | -0.28792800 | 1.97286500  | 2.18723100  |
| H  | 0.35728800  | -3.66049100 | -3.98543400 | C | -2.81609500 | 4.24814600  | 2.30404400  |
| H  | 0.46735700  | -1.19053700 | -3.67929800 | H | -3.94966300 | 4.92513600  | 0.59632900  |
| C  | -2.36893100 | -0.45088100 | -1.16258600 | H | -1.53319600 | 3.38302700  | 3.80735700  |
| C  | -1.83032700 | 0.76454000  | -1.64821100 | H | -3.36970200 | 4.85798700  | 3.01254000  |
| C  | -3.38022900 | -1.09666200 | -1.88422800 | C | 0.35686800  | 2.66209700  | -1.82365000 |
| C  | -2.32569000 | 1.30613500  | -2.84132600 | C | 0.83853700  | 2.14994600  | -3.04119300 |
| C  | -3.85792100 | -0.55067700 | -3.07588200 | C | 0.65728000  | 3.98787000  | -1.47806500 |
| H  | -3.79104700 | -2.03143600 | -1.51636600 | C | 1.58782100  | 2.95296200  | -3.89907100 |
| C  | -3.33192200 | 0.65197100  | -3.55295900 | H | 0.61745500  | 1.12555400  | -3.32392200 |
| H  | -1.91485800 | 2.23481100  | -3.22352400 | C | 1.41403700  | 4.78698400  | -2.33722500 |
| H  | -4.63867200 | -1.06374700 | -3.63016100 | H | 0.29888100  | 4.39856400  | -0.53960600 |
| H  | -3.70265800 | 1.08067500  | -4.47973700 | C | 1.87944500  | 4.27435700  | -3.54934400 |
| Cu | 0.44644500  | -0.29043100 | 0.51576500  | H | 1.94655900  | 2.54494500  | -4.83999200 |
| P  | -1.67524800 | -1.11616500 | 0.40716700  | H | 1.63613100  | 5.81329800  | -2.05791600 |
| P  | -0.48996500 | 1.54191200  | -0.64960200 | H | 2.46694200  | 4.89839500  | -4.21677500 |
| C  | -2.14118000 | -2.88417100 | 0.39420500  | C | 2.31826500  | -0.59763800 | 1.11494600  |
| C  | -3.36580400 | -3.35983800 | 0.88499000  | C | 3.17963000  | 0.70305200  | 1.03154600  |
| C  | -1.21334000 | -3.78655900 | -0.14476100 | C | 4.28320400  | -0.57856200 | -0.31429100 |
| C  | -3.65853400 | -4.72339000 | 0.82713500  | C | 3.14341700  | -1.54687600 | 0.16139700  |
| H  | -4.08612600 | -2.66789800 | 1.31072200  | C | 5.21846800  | -0.38293200 | 0.86027800  |
| C  | -1.51315400 | -5.14698700 | -0.20980000 | H | 2.67463100  | 1.64304000  | 1.25627900  |
| H  | -0.25799300 | -3.42247300 | -0.50683400 | H | 4.72788000  | -0.80655600 | -1.28333000 |
| C  | -2.73531400 | -5.61732300 | 0.27739400  | O | 3.60846200  | 0.69898200  | -0.35723000 |
| H  | -4.60780700 | -5.08769500 | 1.21029300  | H | 2.37327500  | -0.99710700 | 2.13715700  |
| H  | -0.78867200 | -5.83771200 | -0.63216800 | H | 3.59260900  | -2.38101100 | 0.71246900  |
| H  | -2.96629100 | -6.67815800 | 0.23516100  | C | 5.02522600  | 0.79874600  | 2.97332200  |
| C  | -2.72767600 | -0.37965800 | 1.71343700  | H | 4.47821500  | 1.44019000  | 3.66064400  |
| C  | -2.33089900 | -0.57010500 | 3.04732400  | C | 6.29425400  | 0.30358700  | 3.32044600  |
| C  | -3.84666600 | 0.41609300  | 1.43770400  | H | 6.73400800  | 0.57837700  | 4.27592900  |
| C  | -3.04858800 | 0.01938400  | 4.08679900  | C | 7.00152600  | -0.53058300 | 2.45099700  |
| H  | -1.45442100 | -1.17454500 | 3.26740600  | H | 7.98350100  | -0.89802500 | 2.73728400  |
| C  | -4.55512500 | 1.01614000  | 2.47997600  | C | 6.45742600  | -0.89594600 | 1.20678300  |
| H  | -4.15636200 | 0.58082800  | 0.41129100  | H | 7.00500700  | -1.55603400 | 0.53814100  |
| C  | -4.15968200 | 0.81894500  | 3.80416500  | C | 4.50333200  | 0.45707000  | 1.73404500  |
| H  | -2.73417300 | -0.13492200 | 5.11530600  |   |             |             |             |

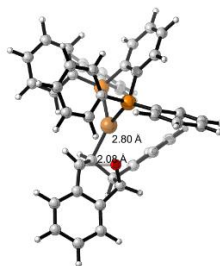

TS45

|    |             |             |             |   |             |             |             |
|----|-------------|-------------|-------------|---|-------------|-------------|-------------|
| C  | -1.15641500 | -2.23529600 | 1.95361900  | H | 4.30132900  | 3.14465400  | -3.20402300 |
| C  | -1.50160700 | -2.96629700 | 0.80284800  | H | 2.44781200  | 3.32251400  | -4.85075400 |
| C  | -0.85780600 | -4.19209000 | 0.57655200  | C | -0.25495200 | 2.61132500  | -0.10755700 |
| C  | 0.11596100  | -4.67001700 | 1.45538700  | C | 0.76219000  | 3.50870200  | -0.45693700 |
| C  | 0.45805100  | -3.93104200 | 2.59132000  | C | -1.48584500 | 2.65720600  | -0.78741300 |
| C  | -0.18775300 | -2.71720100 | 2.83934300  | C | 0.55724200  | 4.43568000  | -1.48047400 |
| H  | -1.65035600 | -1.28946800 | 2.14911100  | H | 1.71914700  | 3.47122500  | 0.05277300  |
| H  | -1.12244900 | -4.77277600 | -0.30435800 | C | -1.69063300 | 3.60043100  | -1.79414000 |
| H  | 0.60547900  | -5.61967700 | 1.25500100  | H | -2.26372500 | 1.94338700  | -0.52930100 |
| H  | 1.21184700  | -4.30194900 | 3.28062900  | C | -0.66753300 | 4.48489100  | -2.14896300 |
| H  | 0.05924900  | -2.14542500 | 3.72985400  | H | 1.35783400  | 5.11567300  | -1.75741500 |
| C  | 2.67739500  | 0.51333400  | 0.85742500  | H | -2.64515800 | 3.63383000  | -2.31270500 |
| C  | 1.76401300  | 1.33151200  | 1.56620200  | H | -0.82292900 | 5.20591600  | -2.94682200 |
| C  | 4.02259600  | 0.47912300  | 1.24762000  | C | -0.89357300 | 1.75689000  | 2.61074300  |
| C  | 2.23183200  | 2.11633100  | 2.62934700  | C | -0.73581900 | 0.95888200  | 3.75679200  |
| C  | 4.46997500  | 1.25623700  | 2.31613600  | C | -1.77374100 | 2.84565000  | 2.65443800  |
| H  | 4.72057300  | -0.15992700 | 0.71548000  | C | -1.43754200 | 1.25133400  | 4.92451500  |
| C  | 3.57542800  | 2.08155500  | 3.00214100  | H | -0.05309400 | 0.11486700  | 3.73555200  |
| H  | 1.53805400  | 2.74833100  | 3.17456600  | C | -2.48236800 | 3.13099400  | 3.82358600  |
| H  | 5.51501700  | 1.21921100  | 2.61052200  | H | -1.90960600 | 3.47033400  | 1.77795000  |
| H  | 3.92187600  | 2.69330300  | 3.83030500  | C | -2.31707100 | 2.33755900  | 4.95996700  |
| Cu | -0.22088700 | -0.65227600 | -0.21134900 | H | -1.30201400 | 0.62888400  | 5.80473800  |
| P  | 2.03065400  | -0.45042900 | -0.57224700 | H | -3.16166800 | 3.97883300  | 3.84459400  |
| P  | -0.01150100 | 1.25018500  | 1.09058200  | H | -2.86969500 | 2.56236600  | 5.8676400   |
| C  | 3.25888800  | -1.78281700 | -0.80374200 | C | -1.71346100 | -1.62440900 | -1.28992600 |
| C  | 4.19825700  | -1.80996800 | -1.84286000 | C | -2.52534900 | -0.54582400 | -1.75829600 |
| C  | 3.19575000  | -2.85914600 | 0.09844000  | C | -3.50938000 | -1.34689000 | 0.29119400  |
| C  | 5.07089900  | -2.89385800 | -1.96908000 | C | -2.47433300 | -2.42776900 | -0.22838200 |
| H  | 4.25062000  | -0.98962000 | -2.55129300 | C | -4.59257000 | -1.30542200 | -0.77463700 |
| C  | 4.07503500  | -3.93258300 | -0.02505000 | H | -2.06753300 | 0.20928900  | -2.40033000 |
| H  | 2.45323800  | -2.85552500 | 0.89223400  | H | -3.88831700 | -1.59981000 | 1.29232000  |
| C  | 5.01429500  | -3.95283000 | -1.06110100 | O | -2.92417100 | -0.07931500 | 0.23039800  |
| H  | 5.79640600  | -2.90763300 | -2.77785700 | H | -1.05930800 | -2.13582200 | -1.99881100 |
| H  | 4.01945500  | -4.75813900 | 0.67918300  | H | -3.03798500 | -3.27710300 | -0.64500500 |
| H  | 5.69445200  | -4.79382500 | -1.16274400 | C | -4.74219700 | -0.46854400 | -3.05132900 |
| C  | 2.24996900  | 0.71953400  | -1.96760700 | H | -4.28145500 | -0.02633700 | -3.93209400 |
| C  | 1.21131600  | 0.82115600  | -2.90502200 | C | -6.10937000 | -0.79796200 | -3.05374000 |
| C  | 3.36345400  | 1.56511000  | -2.08353700 | H | -6.71090300 | -0.58872300 | -3.93462200 |
| C  | 1.28256500  | 1.75374100  | -3.94028400 | C | -6.69780600 | -1.38308700 | -1.93401600 |
| H  | 0.33811800  | 0.18230900  | -2.80530800 | H | -7.75826400 | -1.62174900 | -1.94265300 |
| C  | 3.43669700  | 2.49171100  | -3.12345500 | C | -5.93200200 | -1.64886300 | -0.78129200 |
| H  | 4.16532000  | 1.51098700  | -1.35372000 | H | -6.39743400 | -2.09163100 | 0.09652600  |
| C  | 2.39505600  | 2.59006800  | -4.05013900 | C | -3.99226100 | -0.72399200 | -1.90826000 |
| H  | 0.46500700  | 1.83510300  | -4.65071100 |   |             |             |             |

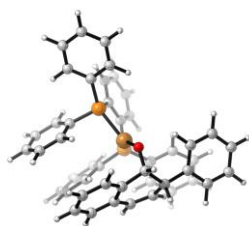

V

|    |             |             |             |   |             |             |             |
|----|-------------|-------------|-------------|---|-------------|-------------|-------------|
| C  | 3.30259800  | -1.75600400 | -2.15837700 | H | -1.44262300 | 2.06107900  | 5.38774600  |
| C  | 3.96387400  | -0.59720500 | -1.72900900 | H | -1.73426700 | 4.23112900  | 4.21066000  |
| C  | 5.25881800  | -0.73161800 | -1.20195300 | C | -2.91380000 | 0.62137600  | -0.07989400 |
| C  | 5.87405000  | -1.97838200 | -1.09700500 | C | -3.63054000 | 0.74872800  | 1.11733800  |
| C  | 5.20133800  | -3.12820400 | -1.52098100 | C | -2.77328400 | 1.73678000  | -0.92181500 |
| C  | 3.91711900  | -3.00810000 | -2.05385400 | C | -4.20271200 | 1.97332900  | 1.46466200  |
| H  | 2.30229200  | -1.65309700 | -2.56206900 | H | -3.72641700 | -0.10228900 | 1.78440100  |
| H  | 5.79166500  | 0.15660000  | -0.86925300 | C | -3.35378600 | 2.95655600  | -0.57672400 |
| H  | 6.87799100  | -2.05265500 | -0.68668300 | H | -2.19188000 | 1.65371400  | -1.83651200 |
| H  | 5.67618700  | -4.10271100 | -1.44161700 | C | -4.06771700 | 3.07653700  | 0.61843100  |
| H  | 3.38517400  | -3.89390400 | -2.39332100 | H | -4.74614400 | 2.06797600  | 2.40053500  |
| C  | -0.79766600 | -1.63787100 | 1.82061900  | H | -3.22998800 | 3.81507600  | -1.23069800 |
| C  | -1.90778400 | -1.89390400 | 0.97924800  | H | -4.50721100 | 4.03053100  | 0.89602300  |
| C  | -0.60040800 | -2.41746900 | 2.96636300  | C | -3.29297900 | -1.84471000 | -1.55566200 |
| C  | -2.80524500 | -2.91310000 | 1.32380800  | C | -2.82443300 | -2.87215100 | -2.38952900 |
| C  | -1.49966600 | -3.43252600 | 3.29464800  | C | -4.66690900 | -1.56748200 | -1.51146100 |
| H  | 0.26392400  | -2.23449100 | 3.59766200  | C | -3.71821400 | -3.62350600 | -3.15223600 |
| C  | -2.60467100 | -3.67523400 | 2.47571000  | H | -1.75795300 | -3.07867700 | -2.44062300 |
| H  | -3.65914100 | -3.11771100 | 0.68610700  | C | -5.55815600 | -2.31464400 | -2.28353300 |
| H  | -1.33665100 | -4.03247500 | 4.18540800  | H | -5.03896200 | -0.77108200 | -0.87461500 |
| H  | -3.30806400 | -4.46355100 | 2.72845300  | C | -5.08660300 | -3.34447000 | -3.10117900 |
| Cu | 0.14394100  | -0.15688600 | -0.89228900 | H | -3.34674700 | -4.41841400 | -3.79288600 |
| P  | 0.32382100  | -0.26388100 | 1.33865500  | H | -6.62122800 | -2.09318600 | -2.24456200 |
| P  | -2.05106000 | -0.91764300 | -0.57717900 | H | -5.78239200 | -3.92377300 | -3.70166400 |
| C  | 1.93734000  | -0.70705100 | 2.06821900  | C | 3.16551400  | 1.36865200  | -0.39281100 |
| C  | 2.57184500  | 0.05685100  | 3.05530800  | C | 2.40479000  | 2.45369100  | -0.18408300 |
| C  | 2.61277000  | -1.80138900 | 1.50193700  | C | 2.09476800  | 0.98373000  | -2.68754600 |
| C  | 3.86399900  | -0.27298200 | 3.47296500  | C | 3.35367400  | 0.79774000  | -1.78154600 |
| H  | 2.06635500  | 0.91215100  | 3.49120200  | C | 1.53753700  | 2.39860300  | -2.50995800 |
| C  | 3.89558400  | -2.13414000 | 1.92905500  | H | 2.32211200  | 2.89181300  | 0.80789300  |
| H  | 2.14082000  | -2.37959600 | 0.71260000  | H | 2.46605400  | 0.89958500  | -3.72647900 |
| C  | 4.52676700  | -1.36635400 | 2.91302000  | O | 1.05790200  | 0.07444600  | -2.52021500 |
| H  | 4.35095500  | 0.32766800  | 4.23635500  | H | 3.70486000  | 0.90810200  | 0.42938100  |
| H  | 4.40962300  | -2.97644100 | 1.47754900  | H | 4.11439000  | 1.44453100  | -2.25528900 |
| H  | 5.53337200  | -1.61704800 | 3.23568600  | C | 0.95074300  | 4.27708300  | -1.07673800 |
| C  | -0.30981400 | 1.15743800  | 2.30317900  | H | 1.02383700  | 4.77835000  | -0.11401600 |
| C  | -0.48462000 | 2.38089900  | 1.64348200  | C | 0.18999300  | 4.83743600  | -2.10092600 |
| C  | -0.66244900 | 1.04847700  | 3.65691600  | H | -0.32993600 | 5.77828300  | -1.94048300 |
| C  | -0.99130100 | 3.48538100  | 2.32876800  | C | 0.10661800  | 4.18692100  | -3.33676300 |
| H  | -0.24332800 | 2.46327000  | 0.59095400  | H | -0.47602200 | 4.62131500  | -4.14498900 |
| C  | -1.17017600 | 2.15332500  | 4.34002900  | C | 0.77562400  | 2.97583700  | -3.52870600 |
| H  | -0.54809300 | 0.10146400  | 4.17517500  | H | 0.69755700  | 2.45837900  | -4.48251900 |
| C  | -1.33308900 | 3.37362700  | 3.67757500  | C | 1.63445800  | 3.06319100  | -1.26601100 |
| H  | -1.13185100 | 4.42491400  | 1.80258300  |   |             |             |             |

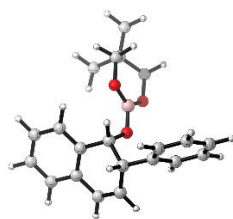

VI

|   |             |             |             |   |             |             |             |
|---|-------------|-------------|-------------|---|-------------|-------------|-------------|
| C | -2.95218300 | 1.23424100  | 0.96722600  | H | 1.86007500  | -5.43681600 | -0.01099700 |
| C | -2.91094000 | 0.51294100  | -0.23368100 | C | 1.81345100  | -3.52926400 | -1.01790600 |
| C | -3.45573600 | 1.09459100  | -1.38439900 | H | 2.72034400  | -3.71292700 | -1.58727100 |
| C | -4.03055500 | 2.36627200  | -1.34146200 | C | 1.12853700  | -2.31954400 | -1.16531600 |
| C | -4.06855600 | 3.07529800  | -0.13965600 | H | 1.50816900  | -1.55258500 | -1.83409000 |
| C | -3.52733400 | 2.50419000  | 1.01489000  | C | -0.53779000 | -3.05175300 | 0.44307200  |
| H | -2.52329800 | 0.79846400  | 1.86394200  | C | 2.57685900  | 1.81134300  | -1.16709900 |
| H | -3.43085700 | 0.54361300  | -2.32191300 | C | 2.59178200  | 2.33087200  | 1.24230000  |
| H | -4.45197900 | 2.79936500  | -2.24480700 | C | 3.47569500  | 1.87637000  | 0.07320800  |
| H | -4.51800000 | 4.06393800  | -0.10166600 | H | 2.24532900  | 2.81950500  | -1.44829800 |
| H | -3.55069900 | 3.04983200  | 1.95456100  | H | 3.11807700  | 1.38337100  | -2.01755700 |
| C | -2.57719100 | -1.76014500 | 0.85407500  | H | 2.26185700  | 3.36639900  | 1.08318700  |
| C | -1.77802600 | -2.78814600 | 1.17556700  | H | 3.15094000  | 2.29688400  | 2.18361400  |
| C | -0.72934800 | -0.72661800 | -0.50875300 | B | 0.90397500  | 0.87873500  | 0.31448100  |
| C | -2.25319200 | -0.84947300 | -0.30792100 | O | 1.43666800  | 1.50214100  | 1.41039100  |
| C | -0.04123800 | -2.07541500 | -0.44700900 | O | 1.41875300  | 0.99492800  | -0.95275200 |
| H | -2.04947800 | -3.47710600 | 1.97235000  | C | 4.09213900  | 0.49829600  | 0.36201200  |
| H | -0.53936200 | -0.25006700 | -1.47351100 | H | 4.72585500  | 0.18029300  | -0.47414600 |
| O | -0.19166700 | 0.09324300  | 0.54046400  | H | 4.71389500  | 0.53677200  | 1.26389500  |
| H | -3.51082600 | -1.59476700 | 1.38534900  | H | 3.33171100  | -0.27446600 | 0.51388300  |
| H | -2.61961900 | -1.34644900 | -1.22062100 | C | 4.58098300  | 2.91222400  | -0.15652400 |
| C | 0.16327400  | -4.25696700 | 0.59197400  | H | 5.22768700  | 2.99109400  | 0.72515500  |
| H | -0.21649700 | -5.00994500 | 1.27841500  | H | 5.21020300  | 2.62664200  | -1.00764600 |
| C | 1.32982000  | -4.49640900 | -0.13423100 | H | 4.16386900  | 3.90536600  | -0.36126900 |

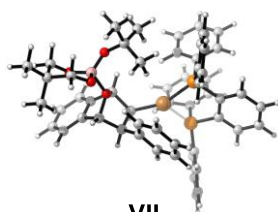

VII

|    |             |             |             |   |             |             |             |
|----|-------------|-------------|-------------|---|-------------|-------------|-------------|
| C  | 1.68813500  | -0.08524400 | -2.81406800 | P | -2.97290100 | -1.23835500 | -0.23627600 |
| C  | 1.01132300  | -1.21031600 | -2.32356100 | P | -1.79971300 | 1.64258500  | -0.02873900 |
| C  | -0.19540200 | -1.58018400 | -2.94082000 | C | -3.74942500 | -2.73950400 | -0.94666400 |
| C  | -0.72433100 | -0.83689700 | -3.99624900 | C | -4.38709300 | -3.71314300 | -0.16566000 |
| C  | -0.04633100 | 0.29154700  | -4.46808400 | C | -3.62771200 | -2.94701600 | -2.33230800 |
| C  | 1.16340700  | 0.65756900  | -3.87488200 | C | -4.89493000 | -4.87096600 | -0.75979500 |
| H  | 2.62028500  | 0.22869700  | -2.35847900 | H | -4.48984600 | -3.56866900 | 0.90480800  |
| H  | -0.72668100 | -2.45693000 | -2.57982500 | C | -4.14636500 | -4.09734200 | -2.92332100 |
| H  | -1.66069400 | -1.14291900 | -4.45652200 | H | -3.13574100 | -2.19929200 | -2.94747400 |
| H  | -0.45310300 | 0.87182400  | -5.29201900 | C | -4.77828500 | -5.06574900 | -2.13697900 |
| H  | 1.70264300  | 1.53134200  | -4.23179900 | H | -5.38772900 | -5.61799500 | -0.14346700 |
| C  | -3.98732200 | 0.13943700  | -0.90911900 | H | -4.05186500 | -4.24162900 | -3.99607300 |
| C  | -3.43691800 | 1.44054500  | -0.85115300 | H | -5.17555300 | -5.96642200 | -2.59639000 |
| C  | -5.24480200 | -0.04845800 | -1.49830400 | C | -3.40888900 | -1.28560300 | 1.54390300  |
| C  | -4.14820900 | 2.51754200  | -1.39528500 | C | -2.57111800 | -2.02598900 | 2.39538300  |
| C  | -5.94404700 | 1.03216100  | -2.03637400 | C | -4.46398900 | -0.54676200 | 2.09488800  |
| H  | -5.67520600 | -1.04356600 | -1.54270900 | C | -2.79605400 | -2.03651800 | 3.77166000  |
| C  | -5.39458800 | 2.31538100  | -1.98848800 | H | -1.73957600 | -2.58718600 | 1.97815800  |
| H  | -3.72128000 | 3.51494400  | -1.36435900 | C | -4.67479300 | -0.54373600 | 3.47440200  |
| H  | -6.91598100 | 0.87119300  | -2.49424500 | H | -5.10909100 | 0.04098100  | 1.45032000  |
| H  | -5.93383700 | 3.15743800  | -2.41290200 | C | -3.84432100 | -1.28876300 | 4.31420100  |
| Cu | -0.72296200 | -0.34601000 | -0.08697400 | H | -2.14470600 | -2.61560100 | 4.42046400  |

|   |             |             |             |   |            |             |             |
|---|-------------|-------------|-------------|---|------------|-------------|-------------|
| H | -5.48514200 | 0.04620800  | 3.89297300  | C | 4.24995500 | -4.77946600 | 1.33178300  |
| H | -4.00863200 | -1.28091200 | 5.38803000  | H | 4.83205100 | -5.69665500 | 1.30868800  |
| C | -2.23897800 | 2.06182200  | 1.70030700  | C | 4.11855100 | -4.01075400 | 0.16215200  |
| C | -3.30871600 | 2.90924900  | 2.02355600  | H | 4.58573100 | -4.33059500 | -0.76551300 |
| C | -1.49366900 | 1.47130500  | 2.73071200  | C | 2.78187200 | -2.42516500 | 1.43321900  |
| C | -3.62234900 | 3.16531000  | 3.35796300  | C | 6.43286600 | -0.15292600 | 1.13492100  |
| H | -3.90285800 | 3.36030600  | 1.23486900  | C | 6.04756200 | 0.95637700  | -1.03635900 |
| C | -1.81080700 | 1.72614500  | 4.06526000  | C | 6.94449700 | -0.06506600 | -0.31397600 |
| H | -0.67903400 | 0.79811400  | 2.48029700  | H | 6.99155300 | -0.92140100 | 1.68664100  |
| C | -2.87485600 | 2.57326700  | 4.37998900  | H | 6.61798700 | 0.81189700  | 1.64074400  |
| H | -4.45413900 | 3.82083000  | 3.60050200  | H | 6.26639200 | 0.95634200  | -2.11271600 |
| H | -1.23433600 | 1.25466300  | 4.85576700  | H | 6.29011100 | 1.96290100  | -0.65681400 |
| H | -3.12653200 | 2.76703100  | 5.41892100  | B | 4.20237000 | 0.37255800  | 0.44029200  |
| C | -1.15798000 | 3.18615700  | -0.76586700 | O | 3.63498200 | 1.37784900  | 1.26318700  |
| C | -0.81837800 | 3.15472000  | -2.12816100 | C | 3.02113700 | 2.60332400  | 0.85124300  |
| C | -0.92068900 | 4.34839700  | -0.02298200 | O | 4.66217500 | 0.70266900  | -0.88265400 |
| C | -0.26020500 | 4.27490500  | -2.73882200 | O | 5.06415700 | -0.48835400 | 1.19050300  |
| H | -0.97899300 | 2.24854300  | -2.70457200 | C | 8.39137600 | 0.43766500  | -0.32640600 |
| C | -0.35255800 | 5.46781100  | -0.63736200 | H | 9.05368200 | -0.26386500 | 0.19609400  |
| H | -1.17099700 | 4.38172500  | 1.03185100  | H | 8.76363200 | 0.54293300  | -1.35347000 |
| C | -0.02258500 | 5.43442600  | -1.99324400 | H | 8.48192100 | 1.41448900  | 0.16500500  |
| H | 0.00030500  | 4.23984800  | -3.79301400 | C | 6.85722900 | -1.44058700 | -0.98662500 |
| H | -0.16857100 | 6.36519800  | -0.05312800 | H | 7.16207500 | -1.38312700 | -2.03937600 |
| H | 0.42159200  | 6.30507300  | -2.46740500 | H | 7.51538100 | -2.16073700 | -0.48392300 |
| C | 0.78250300  | -1.60016300 | 0.21947500  | H | 5.84045200 | -1.83511900 | -0.94202900 |
| C | 2.00084200  | -1.17817000 | 1.08357500  | C | 4.11373400 | 3.67051200  | 0.69656100  |
| C | 2.99114200  | -1.80819500 | -0.79246600 | H | 4.71630200 | 3.73267200  | 1.61033700  |
| C | 1.49686500  | -2.01752800 | -1.13386100 | H | 4.77723500 | 3.42098000  | -0.13709100 |
| C | 3.39223500  | -2.83523900 | 0.23579900  | H | 3.67767000 | 4.65804500  | 0.50123000  |
| H | 1.85384700  | -0.43593600 | 1.86255900  | C | 2.07314500 | 2.98766100  | 1.99407300  |
| H | 3.67409100  | -1.61078200 | -1.61286800 | H | 1.59967500 | 3.95790200  | 1.80655600  |
| O | 2.87953500  | -0.59372000 | 0.04413800  | H | 1.28135100 | 2.23779900  | 2.09904700  |
| H | 0.36478000  | -2.50629800 | 0.67839500  | H | 2.61987500 | 3.04348400  | 2.94271100  |
| H | 1.32906300  | -3.07797900 | -1.35134200 | C | 2.22467900 | 2.47755900  | -0.45037600 |
| C | 2.89284800  | -3.18783200 | 2.58482700  | H | 1.45951300 | 1.70076900  | -0.36485300 |
| H | 2.42348400  | -2.87817800 | 3.51525300  | H | 1.72815300 | 3.42606600  | -0.67362700 |
| C | 3.64548100  | -4.37288800 | 2.52363200  | H | 2.88273000 | 2.22204800  | -1.28152400 |
| H | 3.76487100  | -4.97774100 | 3.41874300  |   |            |             |             |

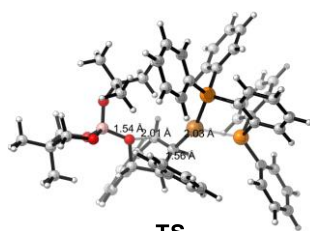

TS<sub>78</sub>

|   |             |             |             |    |             |             |             |
|---|-------------|-------------|-------------|----|-------------|-------------|-------------|
| C | 1.50004700  | -0.33753700 | -2.63396800 | C  | -5.09532000 | 2.30345300  | -2.37859600 |
| C | 0.94183200  | -1.51683900 | -2.11488200 | H  | -3.41801800 | 3.48169300  | -1.72966700 |
| C | -0.17190000 | -2.07054100 | -2.76481100 | H  | -6.64527500 | 0.88587700  | -2.87343700 |
| C | -0.71738100 | -1.46389100 | -3.89834800 | H  | -5.56824500 | 3.13152100  | -2.89868800 |
| C | -0.15649000 | -0.28920700 | -4.40549800 | Cu | -0.66807300 | -0.34721500 | -0.01521100 |
| C | 0.95692100  | 0.26576000  | -3.77023300 | P  | -2.95621800 | -1.20752600 | -0.21546100 |
| H | 2.36392200  | 0.10902400  | -2.15349900 | P  | -1.68471000 | 1.66677700  | -0.10918400 |
| H | -0.61462000 | -2.98538500 | -2.37821300 | C  | -3.74362400 | -2.72925400 | -0.87211500 |
| H | -1.56997200 | -1.91763100 | -4.39614800 | C  | -4.33633600 | -3.69168600 | -0.04260100 |
| H | -0.57551300 | 0.18028200  | -5.29147200 | C  | -3.65819500 | -2.98008000 | -2.25315200 |
| H | 1.40985100  | 1.17445300  | -4.15818700 | C  | -4.83373300 | -4.87936800 | -0.58425200 |
| C | -3.85606200 | 0.16207300  | -1.04879900 | H  | -4.41374400 | -3.51620700 | 1.02521600  |
| C | -3.25575800 | 1.44339700  | -1.04724400 | C  | -4.16553800 | -4.16083000 | -2.79139500 |
| C | -5.08131300 | -0.01850100 | -1.70522600 | H  | -3.20565600 | -2.24124600 | -2.90610700 |
| C | -3.88291900 | 2.50128000  | -1.71802600 | C  | -4.75156400 | -5.11761300 | -1.95693800 |
| C | -5.69738100 | 1.04367400  | -2.36682100 | H  | -5.29257000 | -5.61532900 | 0.07037400  |
| H | -5.55241100 | -0.99567200 | -1.70522500 | H  | -4.09980100 | -4.33622300 | -3.86169900 |

|   |             |             |             |   |            |             |             |
|---|-------------|-------------|-------------|---|------------|-------------|-------------|
| H | -5.14130200 | -6.04116300 | -2.37545700 | C | 3.07510200 | -3.24503400 | 2.81229300  |
| C | -3.52481100 | -1.12684900 | 1.52571600  | H | 2.55085900 | -3.03718800 | 3.74161400  |
| C | -2.77333700 | -1.82266900 | 2.48730600  | C | 4.04973100 | -4.25024300 | 2.74914500  |
| C | -4.62119100 | -0.35846900 | 1.93811600  | H | 4.29772400 | -4.81551500 | 3.64321500  |
| C | -3.12507400 | -1.76413000 | 3.83576700  | C | 4.71113300 | -4.52391400 | 1.54898200  |
| H | -1.91273500 | -2.41034800 | 2.17838200  | H | 5.47260200 | -5.29860400 | 1.51968900  |
| C | -4.95940100 | -0.28617300 | 3.28974000  | C | 4.42236200 | -3.79176100 | 0.38573800  |
| H | -5.20034300 | 0.19571300  | 1.20691800  | H | 4.96240200 | -3.98486400 | -0.53709700 |
| C | -4.21582200 | -0.99018400 | 4.23953600  | C | 2.78114300 | -2.53455900 | 1.65088600  |
| H | -2.54113100 | -2.31114300 | 4.57082600  | C | 6.42769800 | -0.06431400 | 0.92147000  |
| H | -5.80180300 | 0.32483800  | 3.60102600  | C | 5.80486600 | 1.11859600  | -1.15937300 |
| H | -4.48036300 | -0.92966400 | 5.29140800  | C | 6.86874200 | 0.19356300  | -0.53409600 |
| C | -2.27259600 | 2.16552100  | 1.55471300  | H | 7.10429000 | -0.79579500 | 1.39030200  |
| C | -3.33129400 | 3.06884900  | 1.72937600  | H | 6.52300400 | 0.87830900  | 1.49081900  |
| C | -1.66848000 | 1.58941800  | 2.68060200  | H | 6.01667200 | 1.26260900  | -2.23006500 |
| C | -3.77069100 | 3.39623200  | 3.01164400  | H | 5.87905500 | 2.11154200  | -0.67901800 |
| H | -3.81810300 | 3.50955900  | 0.86494500  | B | 4.12135400 | 0.27685800  | 0.35039700  |
| C | -2.11105800 | 1.91555700  | 3.96269800  | O | 3.85927500 | 1.40255900  | 1.21091400  |
| H | -0.86279700 | 0.87488500  | 2.54839200  | C | 2.95083900 | 2.47509600  | 1.02207800  |
| C | -3.16134400 | 2.81983300  | 4.12958900  | O | 4.50269900 | 0.60301800  | -1.03295200 |
| H | -4.59205700 | 4.09601100  | 3.13803600  | O | 5.11745600 | -0.56197100 | 1.00061200  |
| H | -1.64302100 | 1.45496500  | 4.82765900  | C | 8.23347100 | 0.88623000  | -0.55195200 |
| H | -3.51015500 | 3.06974500  | 5.12763700  | H | 9.00294100 | 0.25561200  | -0.08779100 |
| C | -0.96657300 | 3.17504600  | -0.85077000 | H | 8.55644100 | 1.09991500  | -1.57932800 |
| C | -0.52806800 | 3.09443500  | -2.18224000 | H | 8.20701100 | 1.83760600  | -0.00526800 |
| C | -0.79854700 | 4.37094800  | -0.14190500 | C | 6.93205600 | -1.13138000 | -1.30339900 |
| C | 0.05682600  | 4.19876600  | -2.79762000 | H | 7.20586100 | -0.96577100 | -2.35383200 |
| H | -0.64128600 | 2.16551900  | -2.73266100 | H | 7.67895000 | -1.80542600 | -0.86355600 |
| C | -0.20471600 | 5.47411100  | -0.76045600 | H | 5.96358200 | -1.63629100 | -1.27677100 |
| H | -1.12870400 | 4.44559300  | 0.88837700  | C | 3.60289400 | 3.69708100  | 1.68616000  |
| C | 0.22135400  | 5.39182100  | -2.08706300 | H | 3.83437100 | 3.47853200  | 2.73531900  |
| H | 0.39212300  | 4.12639700  | -3.82842100 | H | 4.54188100 | 3.94837500  | 1.17860500  |
| H | -0.07665200 | 6.39733200  | -0.20232300 | H | 2.94493800 | 4.57412300  | 1.65078800  |
| H | 0.68436300  | 6.25050600  | -2.56480500 | C | 1.63852600 | 2.13441000  | 1.74525400  |
| C | 0.72385700  | -1.75587900 | 0.40909500  | H | 0.94076800 | 2.97924200  | 1.73706500  |
| C | 1.69579600  | -1.55312900 | 1.47691700  | H | 1.15273400 | 1.28652600  | 1.25350100  |
| C | 2.96473400  | -1.80300400 | -0.56179500 | H | 1.84167000 | 1.86369500  | 2.78861200  |
| C | 1.49905000  | -2.19545200 | -0.87291900 | C | 2.64765400 | 2.79903100  | -0.44755100 |
| C | 3.46993500  | -2.79184000 | 0.45561500  | H | 2.14503000 | 1.96343800  | -0.93773900 |
| H | 1.40305700  | -0.98191600 | 2.35855000  | H | 1.99265900 | 3.67441300  | -0.50142900 |
| H | 3.59976500  | -1.67643800 | -1.43711600 | H | 3.56495600 | 3.01570700  | -1.00150100 |
| O | 2.84324400  | -0.55408100 | 0.15681300  |   |            |             |             |
| H | -0.02311000 | -2.48394500 | 0.76096100  |   |            |             |             |
| H | 1.45549500  | -3.28089800 | -1.03234600 |   |            |             |             |

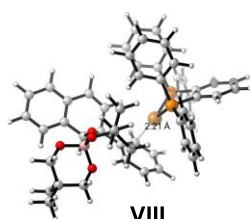

|   |             |             |             |    |             |             |             |
|---|-------------|-------------|-------------|----|-------------|-------------|-------------|
| C | 1.69213200  | 0.25901000  | -2.41900900 | C  | -4.26465200 | 0.88578400  | -0.24697400 |
| C | 1.00210200  | -0.91748500 | -2.08714600 | C  | -3.42576400 | 1.97605400  | 0.09306000  |
| C | -0.25568400 | -1.14951900 | -2.69984300 | C  | -5.64314500 | 1.09395700  | -0.38281300 |
| C | -0.81860000 | -0.20177900 | -3.58226500 | C  | -3.98733400 | 3.24561500  | 0.27331500  |
| C | -0.12805100 | 0.98093800  | -3.86651300 | C  | -6.19063900 | 2.36297600  | -0.19191300 |
| C | 1.13122500  | 1.18888300  | -3.29856300 | H  | -6.28867600 | 0.26195800  | -0.64598200 |
| H | 2.67844000  | 0.44506600  | -2.00610600 | C  | -5.36214200 | 3.43920800  | 0.13115000  |
| H | -0.74094300 | -2.11565300 | -2.57896900 | H  | -3.34723500 | 4.08572600  | 0.52334200  |
| H | -1.76727800 | -0.41940000 | -4.06413900 | H  | -7.26104800 | 2.51077100  | -0.30128600 |
| H | -0.55663600 | 1.71217800  | -4.54594700 | H  | -5.78386300 | 4.43017100  | 0.27216200  |
| H | 1.68561200  | 2.09422000  | -3.53074500 | Cu | -1.36769100 | -0.06380600 | -1.13536300 |

|   |             |             |             |   |             |             |             |
|---|-------------|-------------|-------------|---|-------------|-------------|-------------|
| P | -3.49616400 | -0.75496700 | -0.56259700 | C | 1.56916700  | -2.00098900 | -1.18228500 |
| P | -1.62231900 | 1.65744900  | 0.31685600  | C | 3.39776400  | -3.02562500 | 0.15584100  |
| C | -4.69800700 | -1.62232900 | -1.62919700 | H | 0.38544900  | -3.40807600 | 1.78024700  |
| C | -5.60268400 | -2.57393400 | -1.13940300 | H | 3.67833300  | -1.71582400 | -1.52926000 |
| C | -4.69495200 | -1.31028400 | -2.99847800 | O | 3.10026300  | -0.62754300 | 0.12581800  |
| C | -6.49451600 | -3.20272100 | -2.01051600 | H | -0.39813400 | -2.02765600 | -0.07299700 |
| H | -5.61114500 | -2.82252400 | -0.08309900 | H | 1.63453800  | -2.90787200 | -1.81132600 |
| C | -5.59362100 | -1.93317200 | -3.86285000 | C | 2.80949100  | -4.67749600 | 1.84840800  |
| H | -3.99234500 | -0.57522700 | -3.38311400 | H | 2.06681300  | -5.11337100 | 2.51331500  |
| C | -6.49306900 | -2.88299500 | -3.36979400 | C | 4.10515700  | -5.18973300 | 1.81068400  |
| H | -7.19307500 | -3.93975400 | -1.62459800 | H | 4.38063700  | -6.02201800 | 2.45324300  |
| H | -5.58759100 | -1.68423700 | -4.92018500 | C | 5.04421200  | -4.63055900 | 0.93928700  |
| H | -7.18839100 | -3.37395200 | -4.04457800 | H | 6.05503200  | -5.02850000 | 0.89953400  |
| C | -3.53327600 | -1.63464200 | 1.03775100  | C | 4.68959200  | -3.54983200 | 0.12771400  |
| C | -2.83186000 | -2.84809200 | 1.13182700  | H | 5.42799100  | -3.08402600 | -0.51399500 |
| C | -4.16247200 | -1.11196900 | 2.17431400  | C | 2.44003800  | -3.60963900 | 1.01562300  |
| C | -2.76420300 | -3.52813100 | 2.34664100  | C | 6.75608400  | -0.16559600 | 0.18190200  |
| H | -2.33498700 | -3.25713000 | 0.25657100  | C | 5.75011200  | 1.27588800  | -1.55638000 |
| C | -4.08143200 | -1.78965600 | 3.39188800  | C | 6.93266900  | 0.32748900  | -1.27052800 |
| H | -4.69826000 | -0.17087000 | 2.11514800  | H | 7.52935300  | -0.91890800 | 0.40932100  |
| C | -3.38322900 | -2.99511200 | 3.48096100  | H | 6.92867900  | 0.68889200  | 0.86190600  |
| H | -2.22111800 | -4.46672100 | 2.40942100  | H | 5.77085400  | 1.58841500  | -2.61387700 |
| H | -4.55882400 | -1.36964000 | 4.27220700  | H | 5.88374700  | 2.18917600  | -0.94791800 |
| H | -3.31666400 | -3.51613800 | 4.43166800  | B | 4.35890800  | 0.14437200  | 0.10015500  |
| C | -1.54429100 | 1.14928000  | 2.07212300  | O | 4.36224700  | 1.20230500  | 1.10653500  |
| C | -2.29130000 | 1.79950700  | 3.06659700  | C | 3.37937200  | 2.19299400  | 1.31455400  |
| C | -0.76274100 | 0.03786400  | 2.41301400  | O | 4.51296100  | 0.67696900  | -1.28945700 |
| C | -2.23430300 | 1.35494300  | 4.38699100  | O | 5.49854300  | -0.73622900 | 0.40842200  |
| H | -2.92574600 | 2.64187700  | 2.80885800  | C | 8.25653300  | 1.08262900  | -1.40875100 |
| C | -0.71330800 | -0.40936300 | 3.73287800  | H | 9.11131800  | 0.42868000  | -1.19036600 |
| H | -0.19667300 | -0.48249000 | 1.64958900  | H | 8.38942900  | 1.47000200  | -2.42780700 |
| C | -1.44507300 | 0.25078700  | 4.72129900  | H | 8.30472200  | 1.93515900  | -0.71892000 |
| H | -2.81211900 | 1.86451600  | 5.15290200  | C | 6.89272600  | -0.85958700 | -2.23958900 |
| H | -0.10560600 | -1.27356900 | 3.98342100  | H | 7.02524100  | -0.52666200 | -3.27808600 |
| H | -1.40894000 | -0.09885900 | 5.74913900  | H | 7.69000400  | -1.58127200 | -2.01562800 |
| C | -0.84955300 | 3.30474000  | 0.17729000  | H | 5.93249200  | -1.37664300 | -2.16885900 |
| C | -0.55517900 | 3.75727000  | -1.11850500 | C | 4.05063300  | 3.26915000  | 2.18257100  |
| C | -0.54267200 | 4.11538800  | 1.27814500  | H | 4.43384000  | 2.82175800  | 3.10738000  |
| C | 0.01794000  | 5.01301500  | -1.31135800 | H | 4.89852300  | 3.71493100  | 1.64799900  |
| H | -0.76615800 | 3.11934800  | -1.97203100 | H | 3.34921500  | 4.07017500  | 2.44828800  |
| C | 0.03996200  | 5.36894800  | 1.08118100  | C | 2.18626100  | 1.58931300  | 2.07354300  |
| H | -0.74905900 | 3.77067000  | 2.28528400  | H | 1.43150100  | 2.34666700  | 2.31539000  |
| C | 0.31651300  | 5.82099200  | -0.21089000 | H | 1.73003400  | 0.80927800  | 1.46322600  |
| H | 0.24459200  | 5.35417600  | -2.31739400 | H | 2.52553800  | 1.12701000  | 3.00881500  |
| H | 0.28048500  | 5.98955300  | 1.93959400  | C | 2.87424800  | 2.84457700  | 0.01585500  |
| H | 0.77369900  | 6.79498000  | -0.35968700 | H | 2.32362500  | 2.12690200  | -0.59395200 |
| C | 0.63775200  | -2.35694100 | -0.03858800 | H | 2.20842000  | 3.68219400  | 0.24903600  |
| C | 1.06419800  | -3.11515700 | 0.98172400  | H | 3.71139900  | 3.22267700  | -0.57989500 |
| C | 3.01097100  | -1.78700400 | -0.66030000 |   |             |             |             |

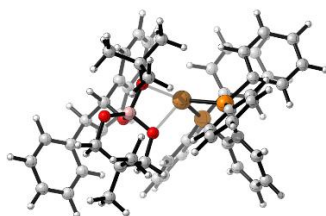

## IX

|   |             |             |             |   |             |             |             |
|---|-------------|-------------|-------------|---|-------------|-------------|-------------|
| C | -5.17189200 | -0.22070900 | 1.30564700  | H | -4.44399100 | -0.76344100 | 1.89974900  |
| C | -5.26868900 | -0.47915300 | -0.06770100 | H | -6.28708200 | 0.06028500  | -1.88528300 |
| C | -6.20039800 | 0.24979400  | -0.81776000 | H | -7.73065400 | 1.76469400  | -0.81816400 |
| C | -7.01586900 | 1.20956800  | -0.21632000 | H | -7.56140800 | 2.18664600  | 1.63070100  |
| C | -6.92177200 | 1.44699500  | 1.15696100  | H | -5.91474800 | 0.90253000  | 2.98497900  |
| C | -5.99793200 | 0.72495000  | 1.91590800  | C | 1.86330800  | -0.41177100 | 2.25498700  |

|    |             |             |             |   |             |             |             |
|----|-------------|-------------|-------------|---|-------------|-------------|-------------|
| C  | 2.55351500  | 0.76447500  | 1.87665900  | H | 5.15296000  | 5.43328000  | -0.69661100 |
| C  | 1.84334300  | -0.78920700 | 3.60432600  | H | 3.28115100  | 6.87345300  | 0.07645900  |
| C  | 3.18732400  | 1.53999300  | 2.85562900  | C | -4.04337800 | -2.67378000 | 0.15852400  |
| C  | 2.48627900  | -0.01336700 | 4.56925600  | C | -3.01373600 | -3.48401300 | -0.11951400 |
| H  | 1.31588900  | -1.68927400 | 3.90274600  | C | -3.12991400 | -0.89383500 | -1.40536400 |
| C  | 3.15438100  | 1.15482700  | 4.19590400  | C | -4.39576400 | -1.51379000 | -0.74236700 |
| H  | 3.70125400  | 2.45217600  | 2.56890600  | C | -2.27405200 | -2.02567100 | -1.98499400 |
| H  | 2.45989100  | -0.31842100 | 5.61150500  | H | -2.79741300 | -4.35041900 | 0.49971500  |
| H  | 3.64797100  | 1.76608200  | 4.94615400  | H | -3.47500700 | -0.25649800 | -2.23074500 |
| Cu | 0.59991600  | 0.30311000  | -0.54633800 | O | -2.40262700 | -0.12667600 | -0.47889400 |
| P  | 0.97896900  | -1.36443300 | 0.94519900  | H | -4.68432300 | -2.87588400 | 1.01234900  |
| P  | 2.58087000  | 1.20588500  | 0.08832800  | H | -4.97462800 | -1.92925000 | -1.58487000 |
| C  | -0.22766900 | -2.33683000 | 1.91411200  | C | -1.35139700 | -4.27353900 | -1.79830800 |
| C  | -0.10305600 | -3.71185600 | 2.14577100  | H | -1.28350600 | -5.21363500 | -1.25572500 |
| C  | -1.31767700 | -1.63812500 | 2.45708100  | C | -0.64025900 | -4.09542400 | -2.98400800 |
| C  | -1.05077300 | -4.37802300 | 2.92753300  | H | -0.01107300 | -4.89467700 | -3.36684900 |
| H  | 0.73352400  | -4.26035400 | 1.72448700  | C | -0.74490400 | -2.88526300 | -3.67420300 |
| C  | -2.24669700 | -2.30141300 | 3.25552600  | H | -0.20471600 | -2.73689600 | -4.60573900 |
| H  | -1.43577200 | -0.58159900 | 2.24302400  | C | -1.55174100 | -1.86258400 | -3.16636500 |
| C  | -2.11677900 | -3.67375100 | 3.49111100  | H | -1.62316500 | -0.92224700 | -3.69503000 |
| H  | -0.94812700 | -5.44534600 | 3.10389600  | C | -2.18341200 | -3.25863000 | -1.30002100 |
| H  | -3.08095400 | -1.75107300 | 3.68173500  | C | -3.55398500 | 2.71371800  | -0.25868900 |
| H  | -2.84746400 | -4.19208300 | 4.10578100  | C | -1.77195100 | 2.10022000  | 1.35682200  |
| C  | 2.22625600  | -2.56230300 | 0.34755100  | C | -2.70995600 | 3.24186800  | 0.92410800  |
| C  | 1.98440700  | -3.16124100 | -0.89785600 | H | -4.25413800 | 1.96576300  | 0.12708900  |
| C  | 3.42269200  | -2.83683800 | 1.02303100  | H | -4.14907400 | 3.53726800  | -0.67810900 |
| C  | 2.91528900  | -4.03933900 | -1.45025200 | H | -2.37186700 | 1.28195700  | 1.78292600  |
| H  | 1.07140400  | -2.92931700 | -1.43520100 | H | -1.07542500 | 2.44562800  | 2.13386300  |
| C  | 4.36382500  | -3.69836300 | 0.45652400  | B | -1.82283200 | 1.16216100  | -0.89985700 |
| H  | 3.62882700  | -2.36541900 | 1.97848500  | O | -0.80749500 | 0.87687300  | -1.96549700 |
| C  | 4.11036300  | -4.30443400 | -0.77620100 | C | -0.43456000 | 1.74747900  | -3.05787000 |
| H  | 2.71444800  | -4.50148800 | -2.41291500 | O | -1.01519900 | 1.63588000  | 0.25729300  |
| H  | 5.29689500  | -3.89318600 | 0.97775300  | O | -2.78453700 | 2.16069600  | -1.31299700 |
| H  | 4.84628900  | -4.97303400 | -1.21416300 | C | -1.88821100 | 4.47261900  | 0.52193600  |
| C  | 4.11139600  | 0.38776100  | -0.49613600 | H | -2.53766700 | 5.26780100  | 0.13326600  |
| C  | 5.31622800  | 0.44645000  | 0.22116600  | H | -1.34984300 | 4.87707700  | 1.38967500  |
| C  | 4.04181000  | -0.38962000 | -1.66012100 | H | -1.15434900 | 4.22478700  | -0.24516200 |
| C  | 6.43447100  | -0.25562100 | -0.22650700 | C | -3.64443100 | 3.60543600  | 2.08318100  |
| H  | 5.37577900  | 1.02963100  | 1.13501300  | H | -3.07375100 | 3.98219600  | 2.94198800  |
| C  | 5.16061300  | -1.09545000 | -2.10440700 | H | -4.35266600 | 4.38965100  | 1.78601500  |
| H  | 3.10395500  | -0.46212300 | -2.20131900 | H | -4.22718000 | 2.74023600  | 2.41565000  |
| C  | 6.35706000  | -1.02860200 | -1.38878600 | C | 0.78809200  | 1.09473300  | -3.70911300 |
| H  | 7.36303600  | -0.20756100 | 0.33547600  | H | 1.63701800  | 1.09984400  | -3.01607600 |
| H  | 5.09215800  | -1.70703100 | -2.99913000 | H | 0.57222300  | 0.05606100  | -3.98029300 |
| H  | 7.22613000  | -1.58436700 | -1.72959400 | H | 1.08303900  | 1.63814600  | -4.61424900 |
| C  | 2.90507000  | 3.00295800  | 0.10075200  | C | -0.07040500 | 3.14996000  | -2.56458500 |
| C  | 1.84219200  | 3.82260700  | 0.52139100  | H | 0.33768900  | 3.74730200  | -3.38936900 |
| C  | 4.09531400  | 3.59195600  | -0.34282900 | H | -0.95491100 | 3.65243400  | -2.17233400 |
| C  | 1.98138500  | 5.20822700  | 0.52091200  | H | 0.68268000  | 3.09648700  | -1.77476500 |
| H  | 0.90252700  | 3.36816900  | 0.82137600  | C | -1.58610200 | 1.83630100  | -4.06903000 |
| C  | 4.22623200  | 4.98358900  | -0.35080700 | H | -2.48944600 | 2.19465200  | -3.57248700 |
| H  | 4.91879600  | 2.97132300  | -0.68057000 | H | -1.32395800 | 2.52984500  | -4.87737900 |
| C  | 3.17527500  | 5.79228700  | 0.08453500  | H | -1.79548600 | 0.86255000  | -4.52362900 |
| H  | 1.15357100  | 5.83235700  | 0.84558600  |   |             |             |             |



## References

1. Y. Li, W. Yang, G. Cheng, D. Yang, *J. Org. Chem.* **2016**, *81*, 4744–4750.
2. D. B. Millward, G. Sammis, R. M. Waymouth, *J. Org. Chem.* **2000**, *65*, 3902–3909.
3. M. Lautens, K. Fagnou, D. Yang, *J. Am. Chem. Soc.* **2003**, *125*, 14884–14892
4. M. Davoust, J. A. Kitching, M. J. Fleming, M. Lautens, *Chem. Eur. J.* **2010**, *16*, 50–54.
5. João M. J. M. Ravasco, Monteiro, C. M. Siopa, F. Trindade, A. F. Afonso, C. A. M., *ChemSusChem*, **2019**, *12*, 4629–4635.
6. W. D. Castro-Godoy, L. C. Schmidt, J. E. Ar-güello. *Eur. J. Org. Chem.* **2019**, *19*, 3035–3039.
7. M. J. Frisch, G. W. Trucks, H. B. Schlegel, G. E. Scuseria, M. A. Robb, J. R. Cheeseman, G. Scalmani, V. Barone, G. A. Petersson, H. Nakatsuji, X. Li, M. Caricato, A. V. Marenich, J. Bloino, B. G. Janesko, R. Gomperts, B. Mennucci, H. P. Hratchian, J. V. Ortiz, A. F. Izmaylov, J. L. Sonnenberg, D. Williams-Young, F. Ding, F. Lipparini, F. Egidi, J. Goings, B. Peng, A. Petrone, T. Henderson, D. Ranasinghe, V. G. Zakrzewski, J. Gao, N. Rega, G. Zheng, W. Liang, M. Hada, M. Ehara, K. Toyota, R. Fukuda, J. Hasegawa, M. Ishida, T. Nakajima, Y. Honda, O. Kitao, H. Nakai, T. Vreven, K. Throssell, J. A. Montgomery Jr., J. E. Peralta, F. Ogliaro, M. J. S2 Bearpark, J. J. Heyd, E. N. Brothers, K. N. Kudin, V. N. Staroverov, T. A. Keith, R. Kobayashi, J. Normand, K. Raghavachari, A. P. Rendell, J. C. Burant, S. S. Iyengar, J. Tomasi, M. Cossi, J. M. Millam, M. Klene, C. Adamo, R. Cammi, J. W. Ochterski, R. L. Martin, K. Morokuma, O. Farkas, J. B. Foresman, D. J. Fox, Gaussian16, Gaussian, Inc., Wallingford, CT, **2016**.
8. (a) A.D. Becke, *J. Chem. Phys.* **1993**, *98*, 5648–5652; (b) C. Lee, W. Yang, R.G. Parr, *Phys. Rev. B* **1988**, *37*, 785–789; (c) S. H. Vosko, L. Wilk, M. Nusair, *Can. J. Phys.* **1980**, *58*, 1200–1211; (d) P.J. Stephens, F.J. Devlin, C.F. Chabalowski, M.J. Frisch, *J. Phys. Chem.* **1994**, *98*, 11623–11627.
9. (a) Grimme, S.; Antony, J.; Ehrlich, S.; Krieg, H. *J. Chem. Phys.* **2010**, *132*, 154104–15419. (b) Grimme, S.; Ehrlich, S.; Goerigk, L. *J. Comp. Chem.* **2011**, *32*, 1456–1465; (c) Phys, J. C.; Becke, A. D.; Johnson, E. R., *J. Chem. Phys.* **2005**, *123*, 154101–154109.
10. Zhao, Y.; D. G. Truhler, *Theor. Chem. Acc.* **2008**, *120*, 215–241.
11. Legault, C. Y. CYLView, 1.0b; Université de Sherbrooke, Canada, **2009**; <http://www.cylview.org>.

#### 4. Copies of NMR spectra for all new compounds.

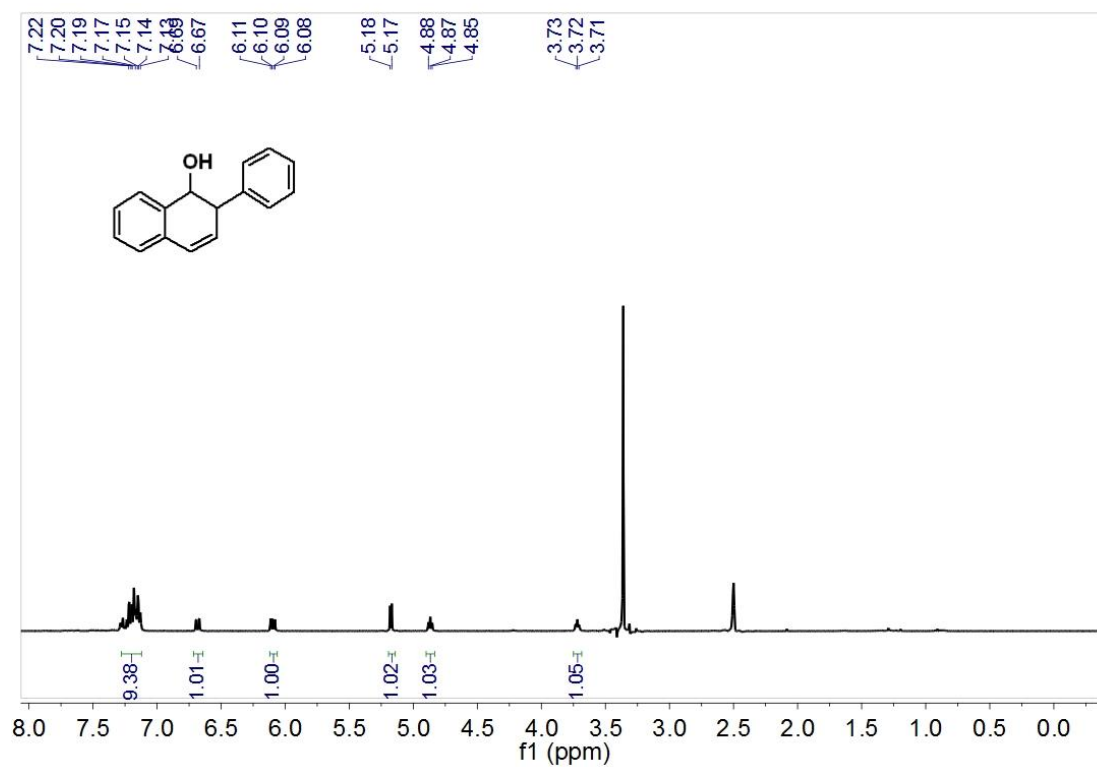

Figure S2.  $^1\text{H}$  NMR (400 MHz,  $\text{DMSO-}d_6$ ) for product 3a.

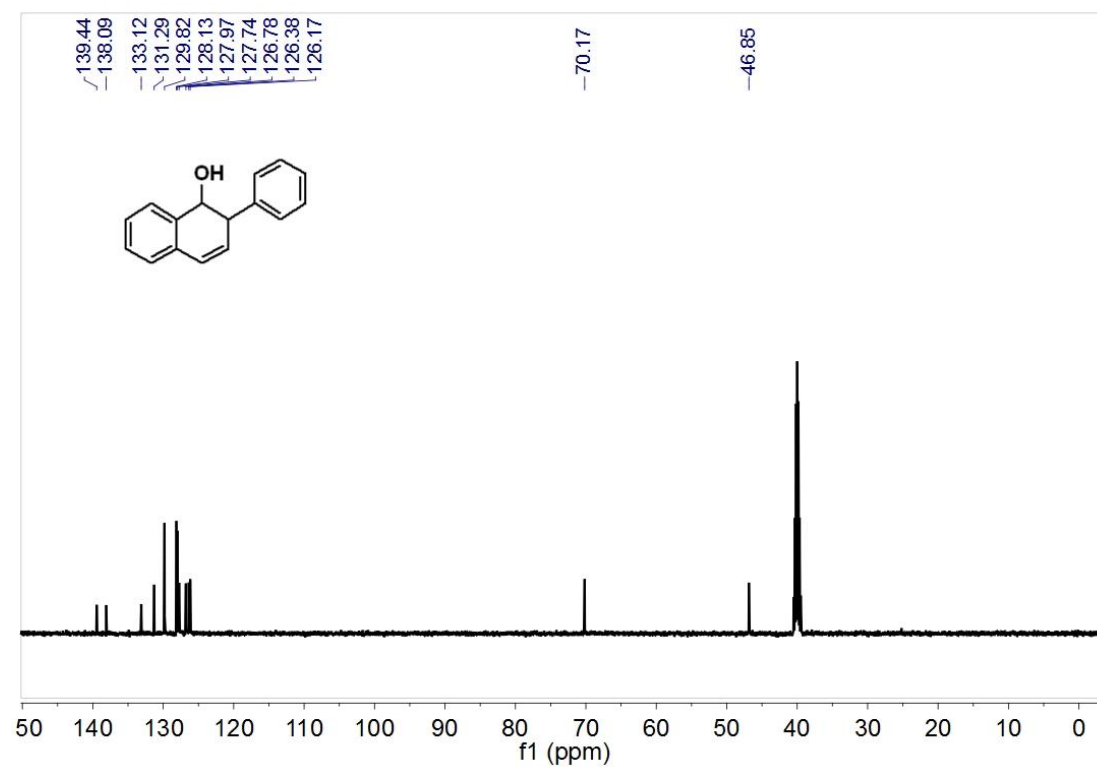

Figure S3.  $^{13}\text{C}$  NMR (126 MHz,  $\text{DMSO-}d_6$ ) for product 3a.

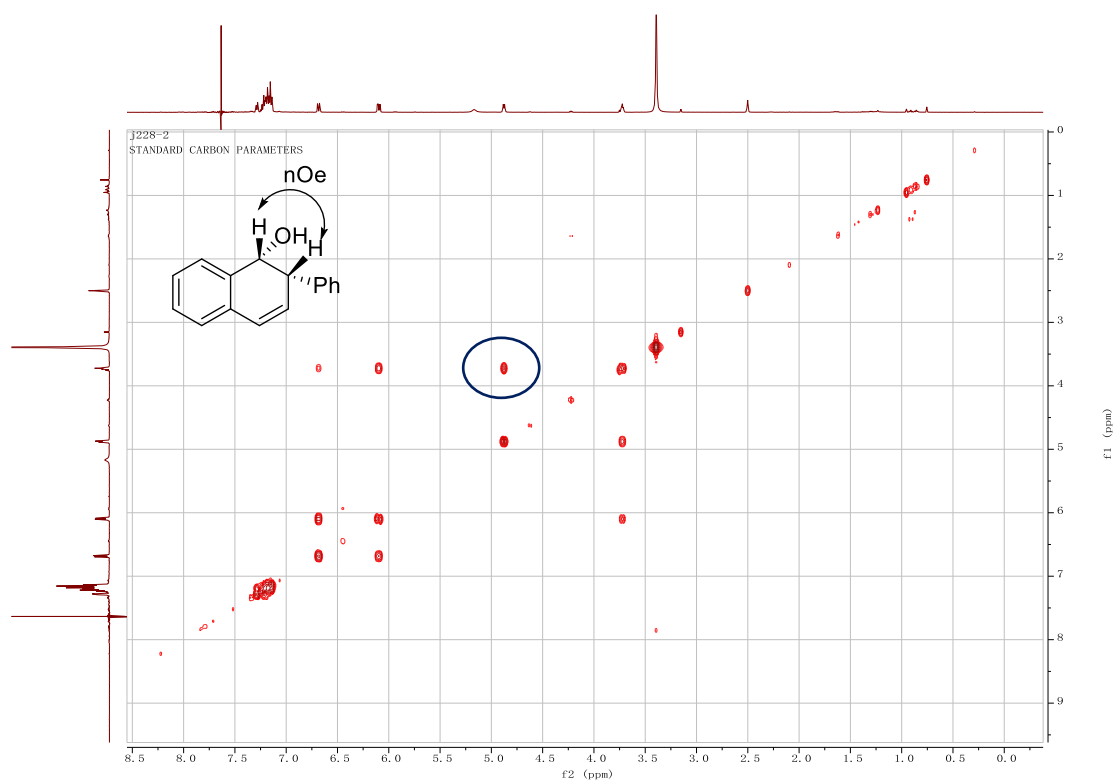

**Figure S4.** 2D NOESY spectrum of product **3a**

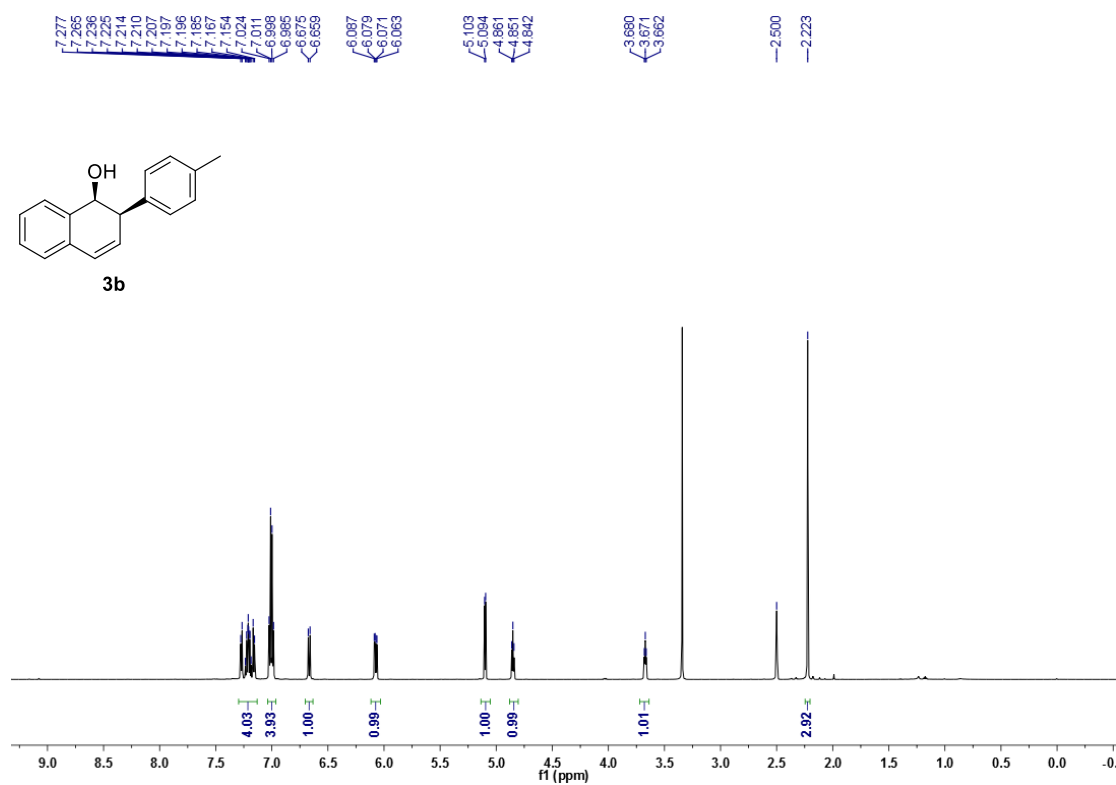

**Figure S5.**  $^1\text{H}$  NMR (600 MHz,  $\text{DMSO-}d_6$ ) for product **3b**.

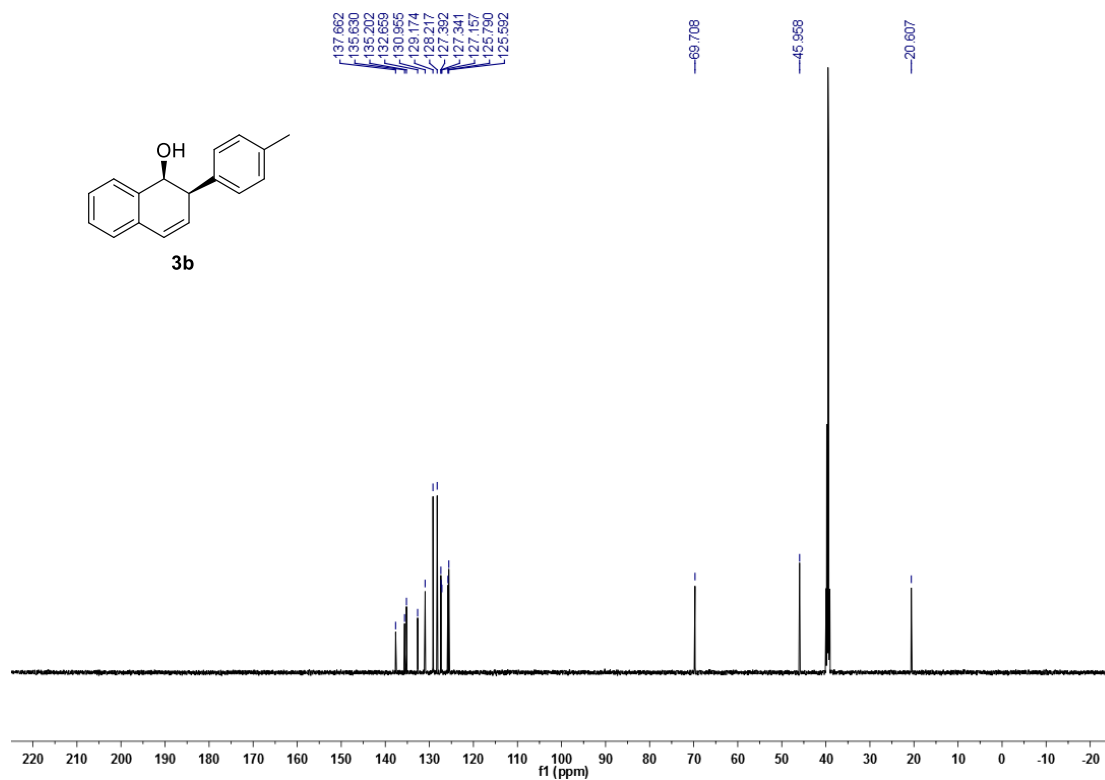

**Figure S6.**  $^{13}\text{C}$  NMR (151 MHz,  $\text{DMSO-}d_6$ ) for product **3b**.

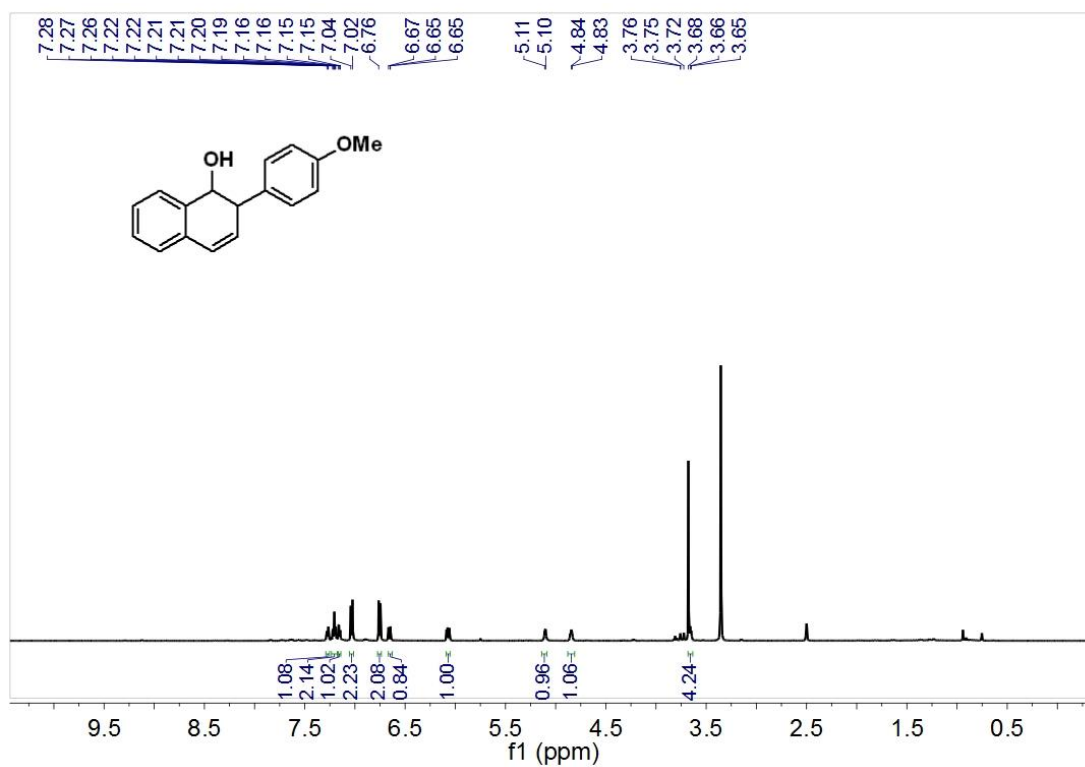

**Figure S7.**  $^1\text{H}$  NMR (500 MHz,  $\text{DMSO-}d_6$ ) for product **3c**.

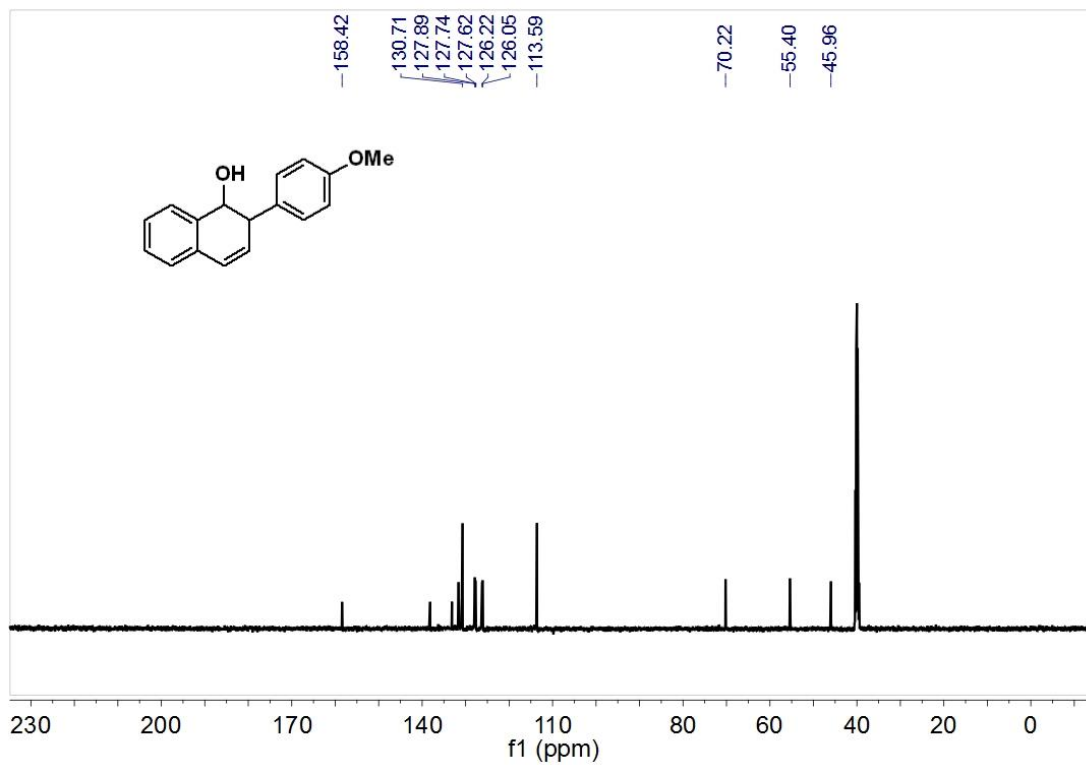

**Figure S8.** <sup>13</sup>C NMR (126 MHz, DMSO-*d*<sub>6</sub>) for product **3c**.

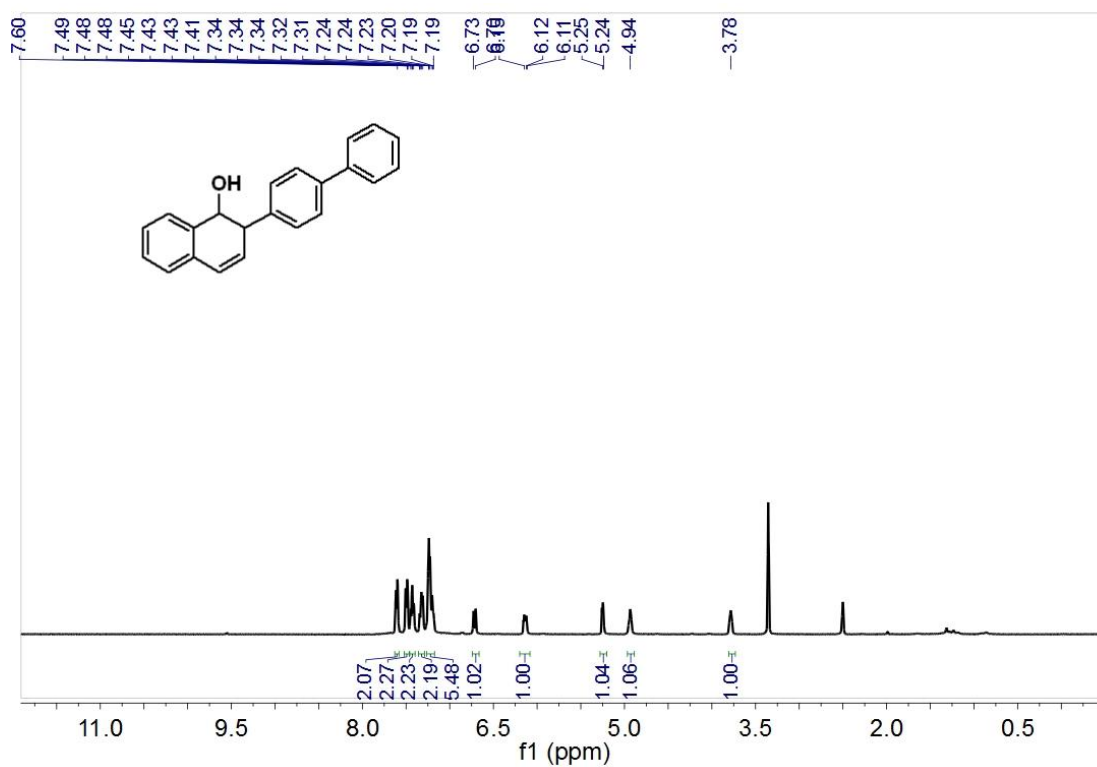

**Figure S9.** <sup>1</sup>H NMR (400 MHz, DMSO-*d*<sub>6</sub>) for product **3d**.

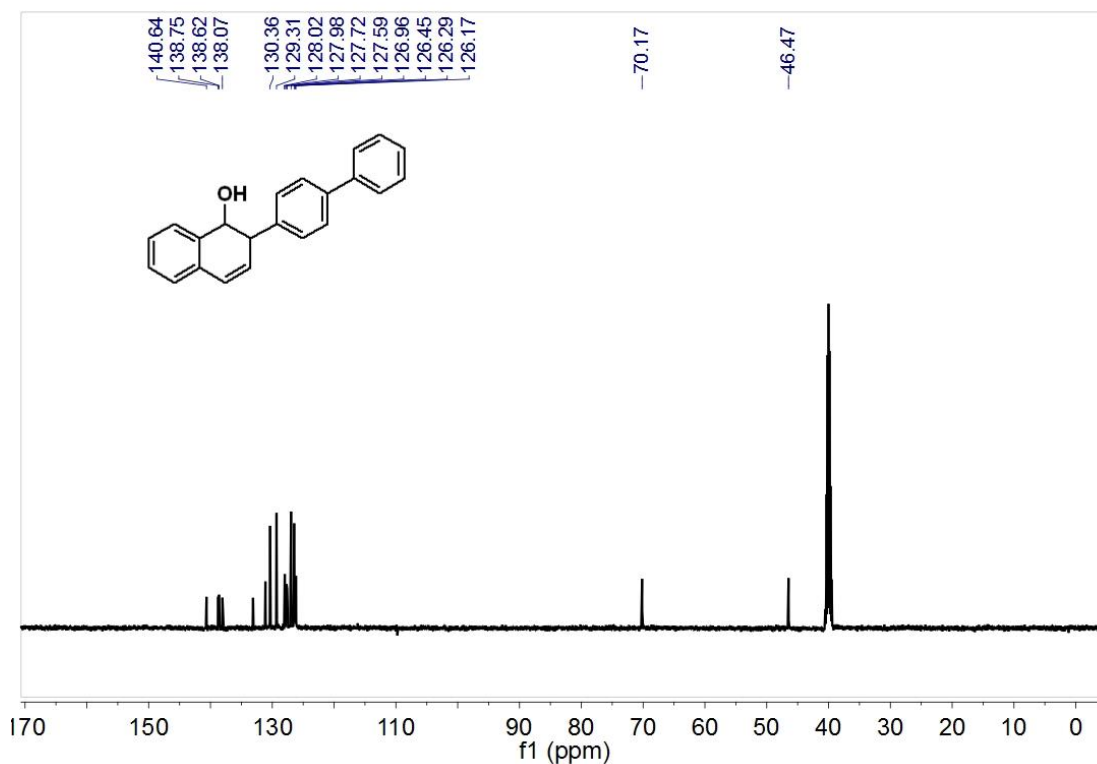

**Figure S10.** <sup>13</sup>C NMR (126 MHz, DMSO-*d*<sub>6</sub>) for product **3d**.

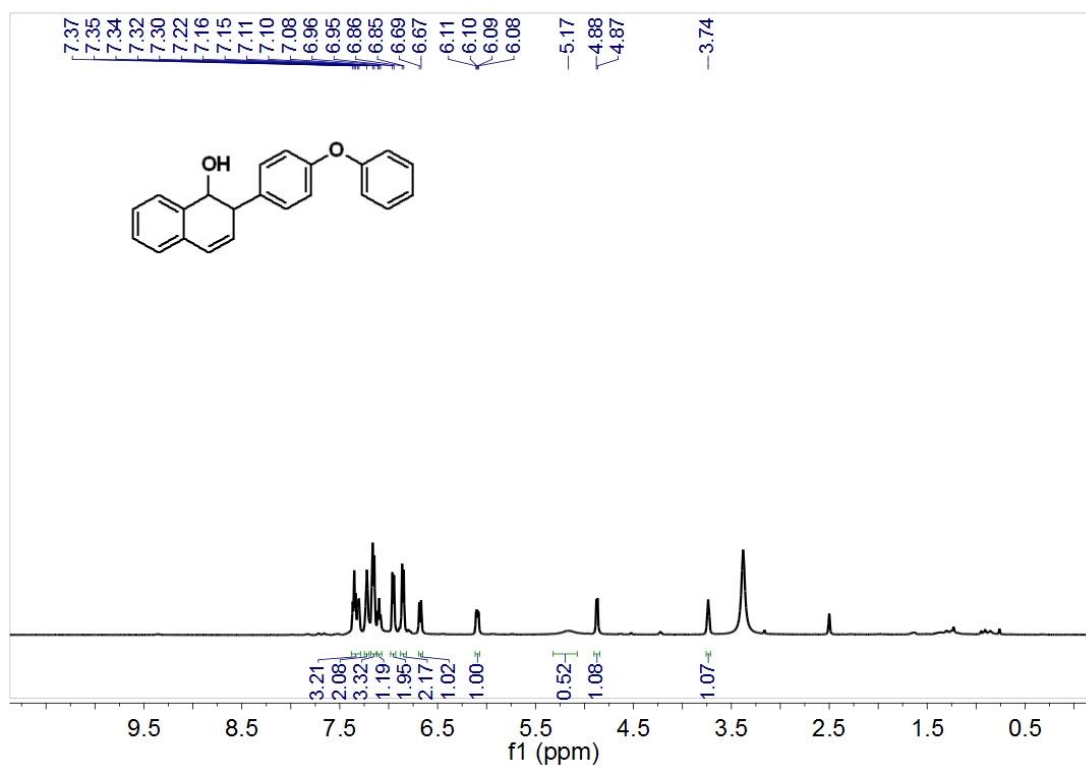

**Figure S11.** <sup>1</sup>H NMR (500 MHz, DMSO-*d*<sub>6</sub>) for product **3e**.

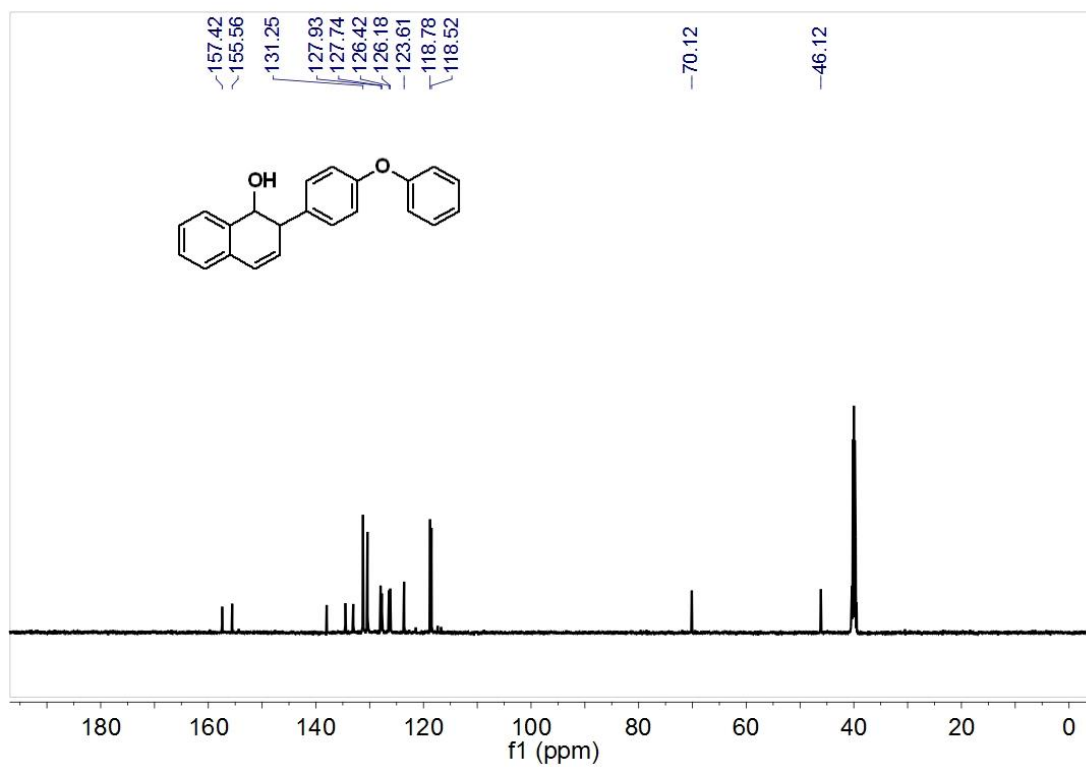

**Figure S12.**  $^{13}\text{C}$  NMR (126 MHz,  $\text{DMSO-}d_6$ ) for product **3e**.

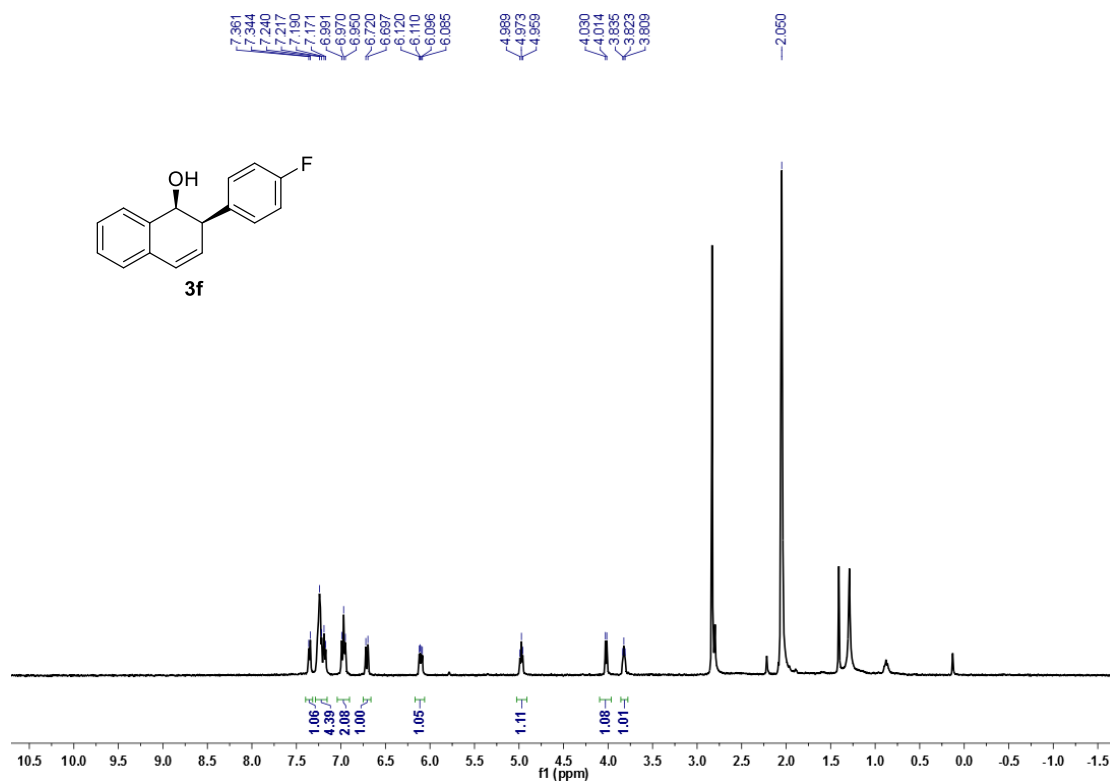

**Figure S13.**  $^1\text{H}$  NMR (400 MHz,  $\text{Acetone-}d_6$ ) for product **3f**.

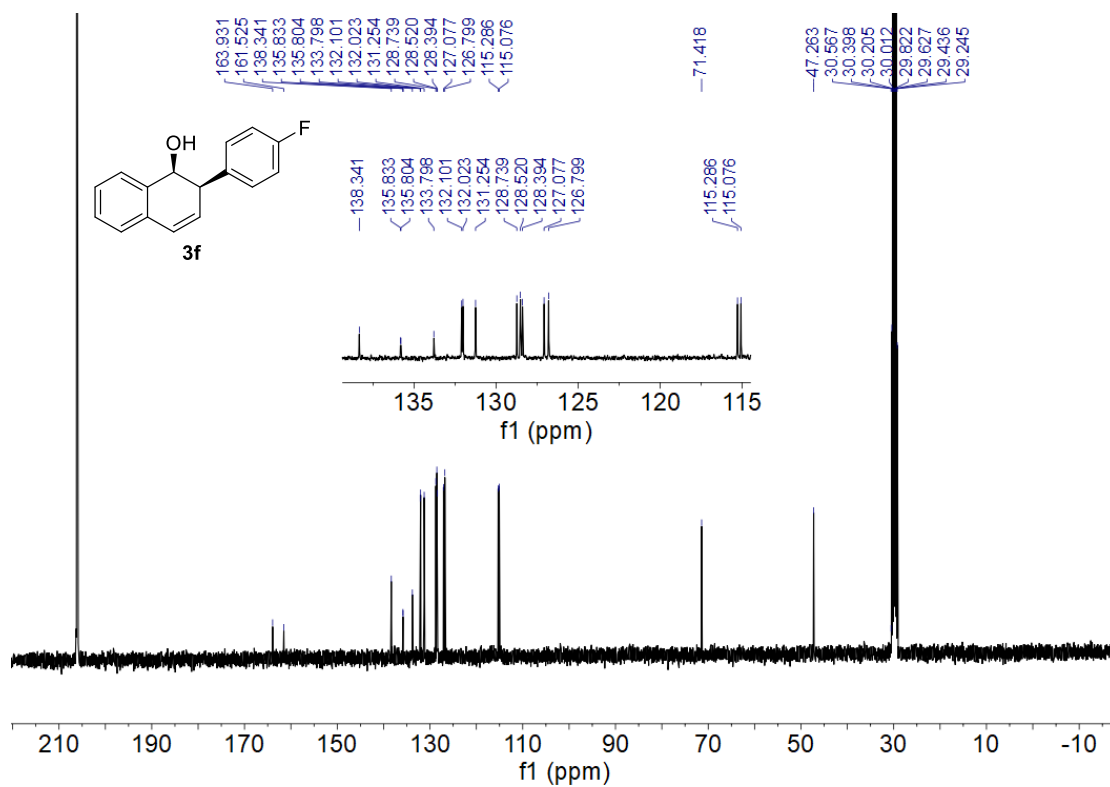

**Figure S14.**  $^{13}\text{C}$  NMR (101 MHz, acetone- $d_6$ ) for product **3f**.

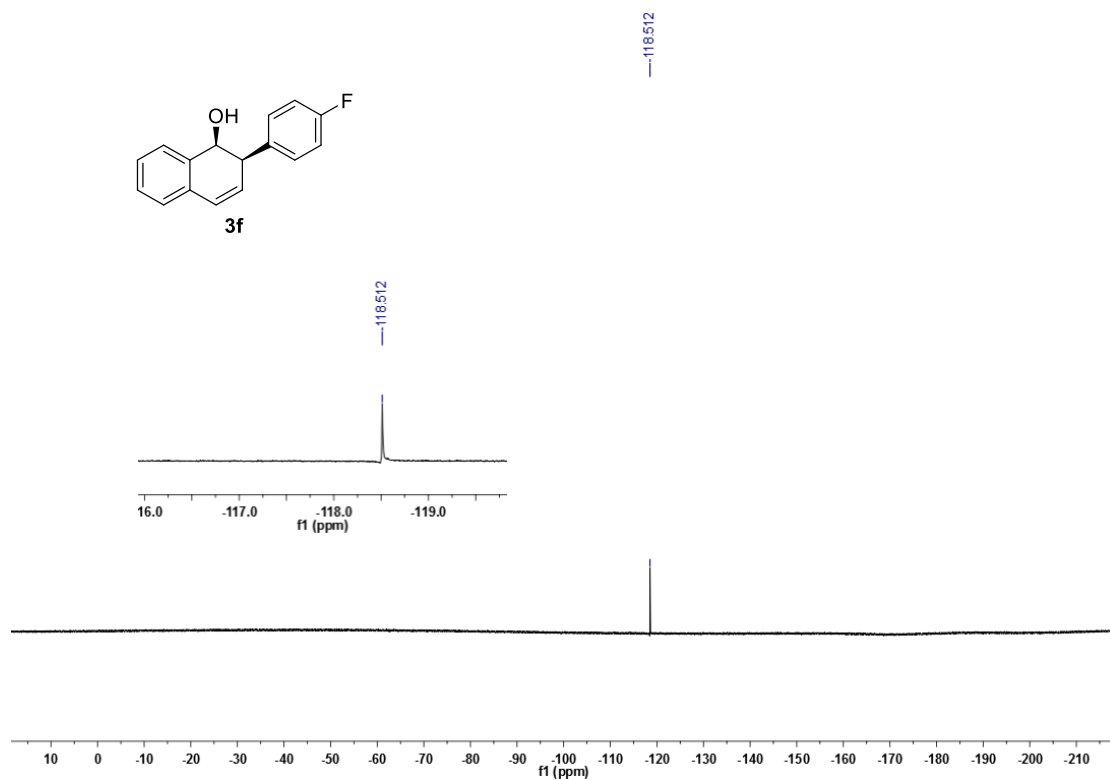

**Figure S15.**  $^{19}\text{F}$  NMR (376 MHz, Acetone- $d_6$ ) for product **3f**.



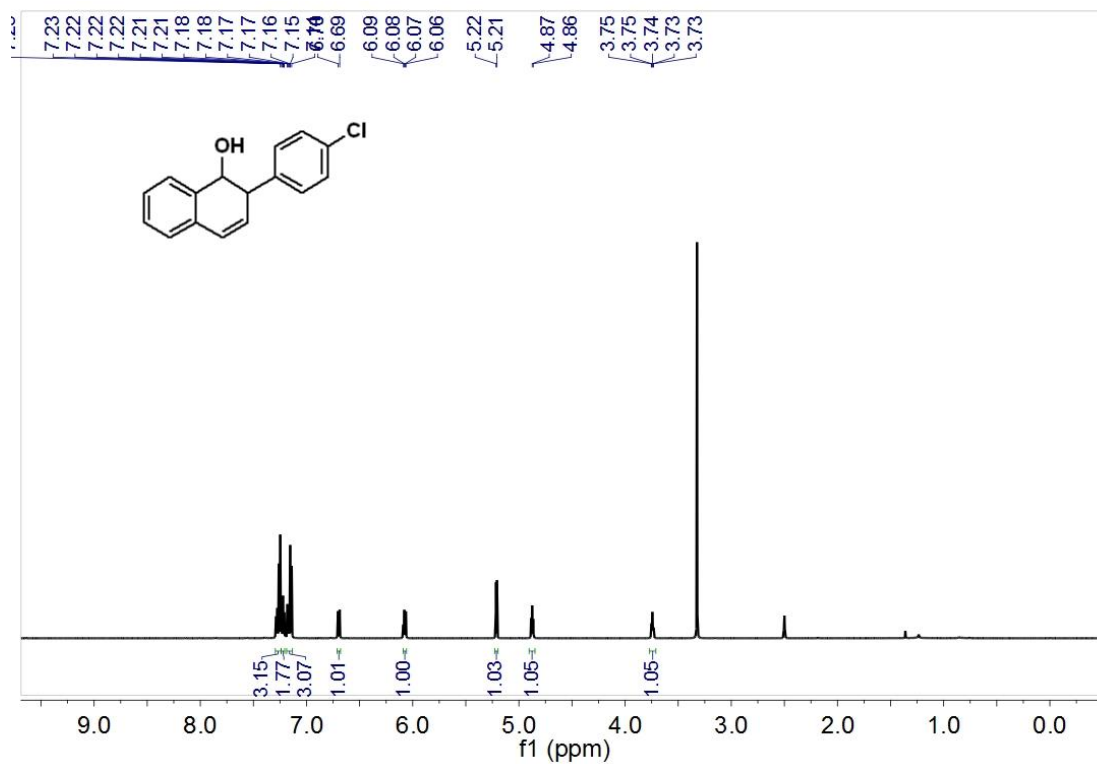

**Figure S16.**  $^1\text{H}$  NMR (600 MHz,  $\text{DMSO-}d_6$ ) for product **3g**.

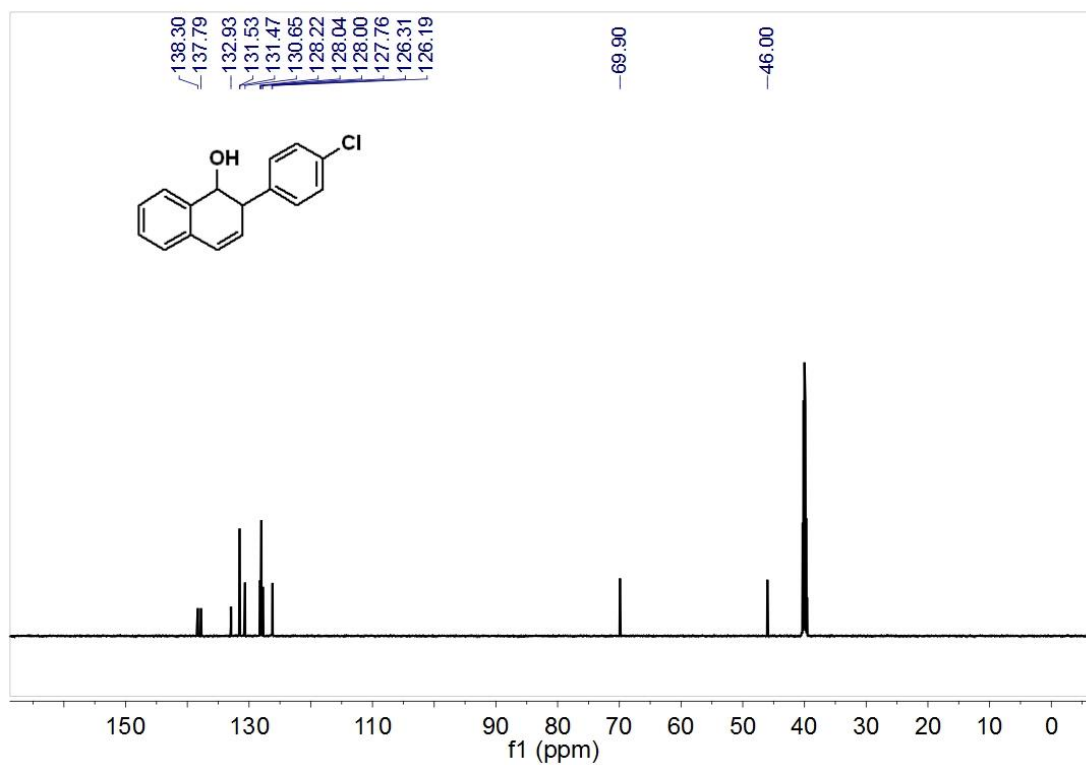

**Figure S17.**  $^{13}\text{C}$  NMR (151 MHz,  $\text{DMSO-}d_6$ ) for product **3g**.

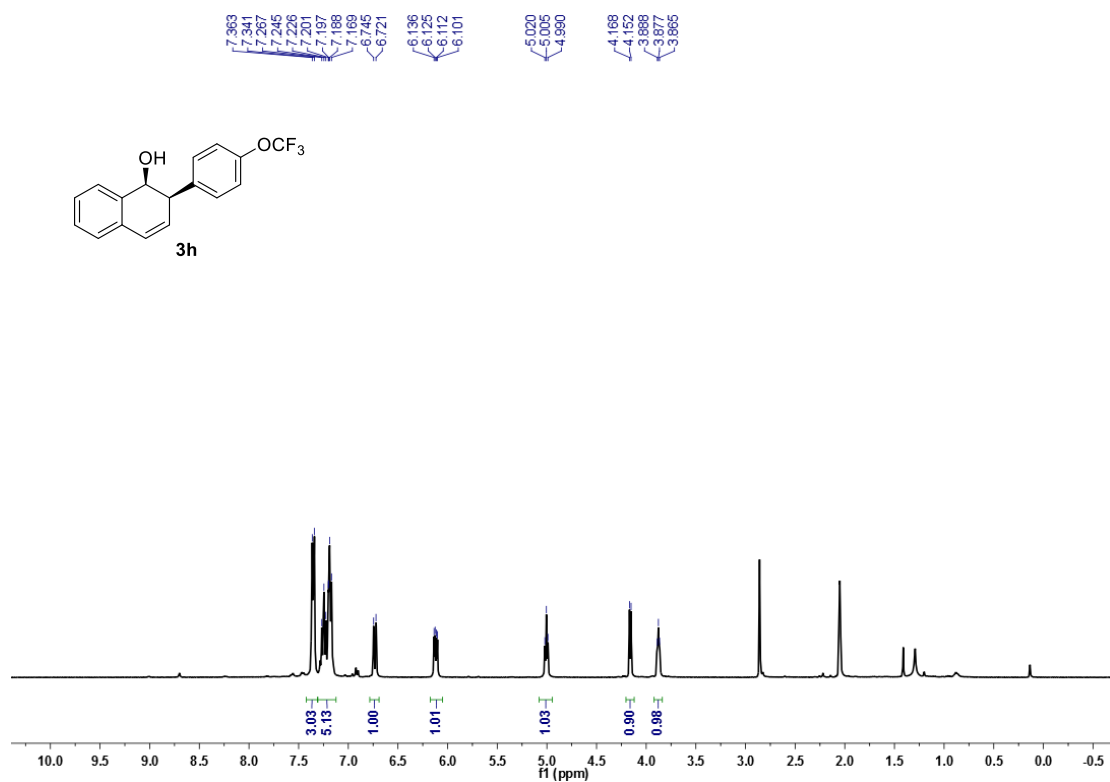

**Figure S18.** <sup>1</sup>H NMR (400 MHz, Acetone-*d*<sub>6</sub>) for product **3h**.

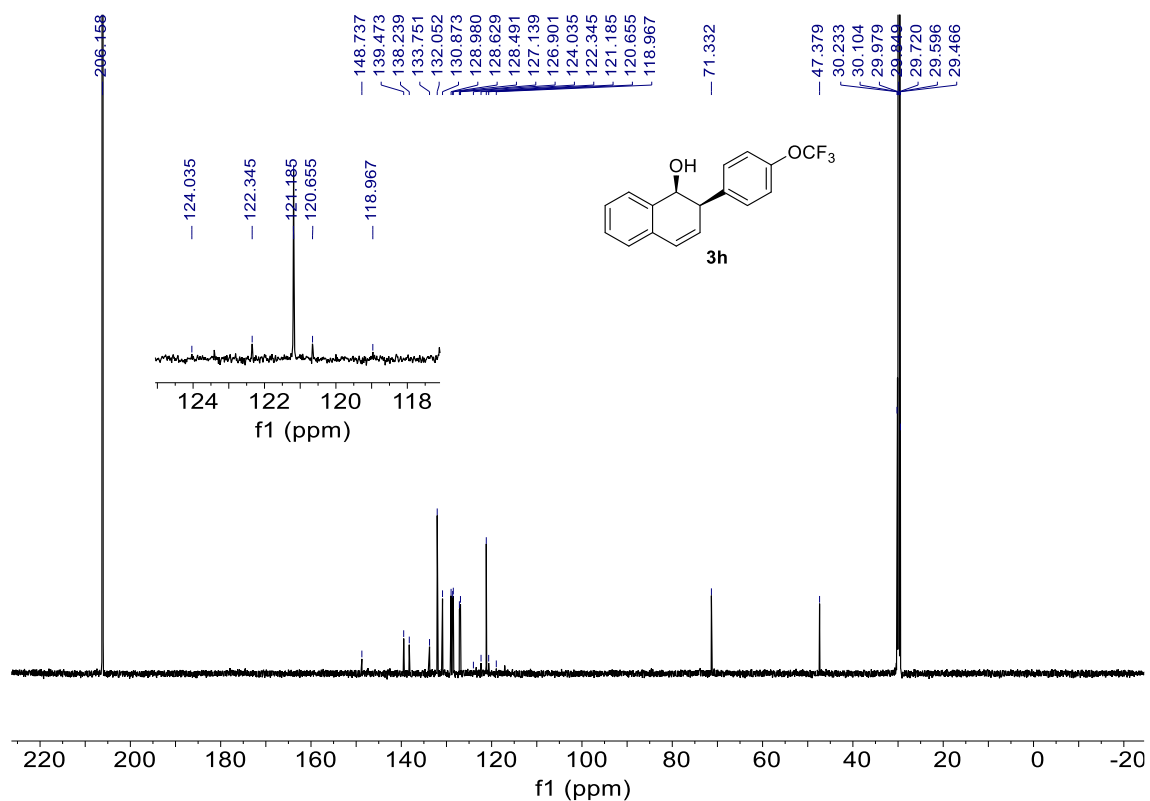

**Figure S19.** <sup>13</sup>C NMR (101 MHz, Acetone-*d*<sub>6</sub>) for product **3h**.

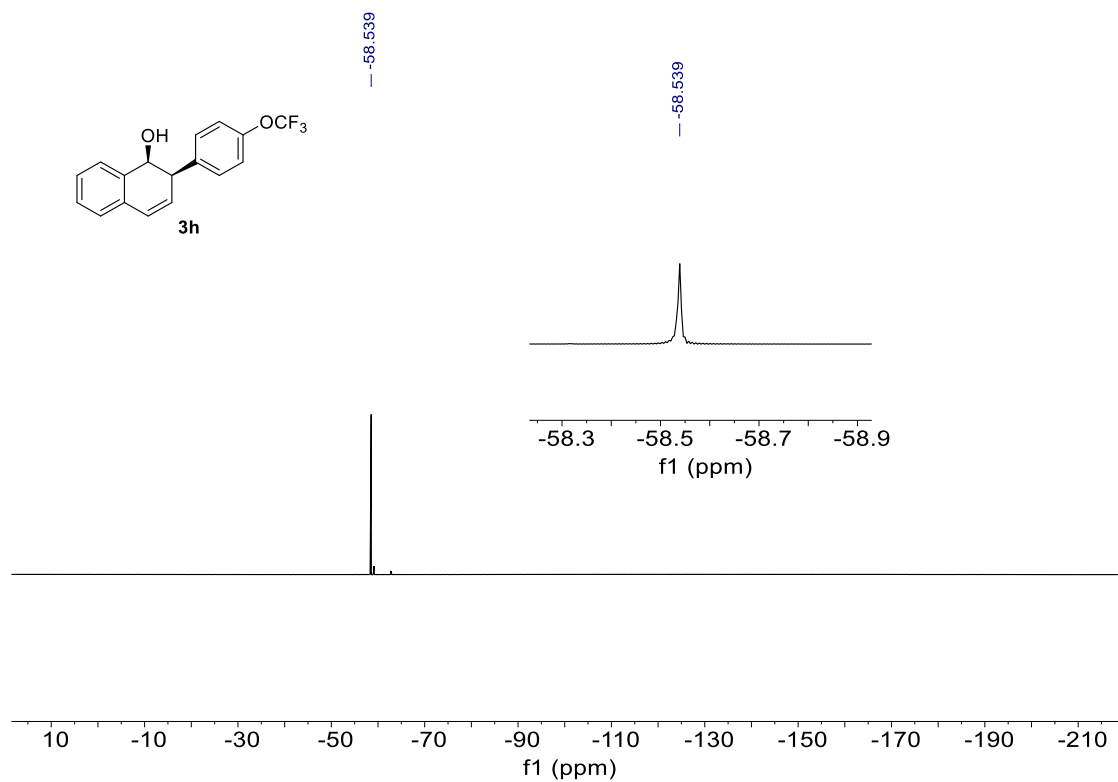

**Figure S20.**  $^{19}\text{F}$  NMR (376 MHz, Acetone- $d_6$ ) for product **3h**.

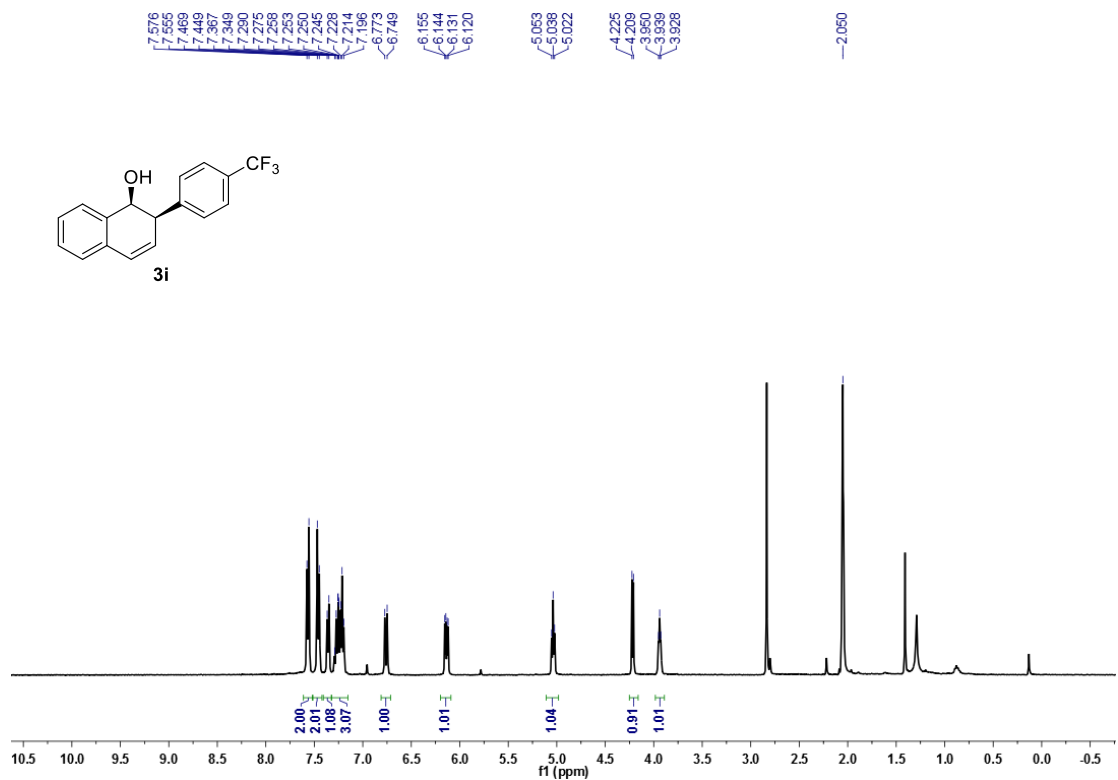

**Figure S21.**  $^1\text{H}$  NMR (400 MHz, Acetone- $d_6$ ) for product **3i**.

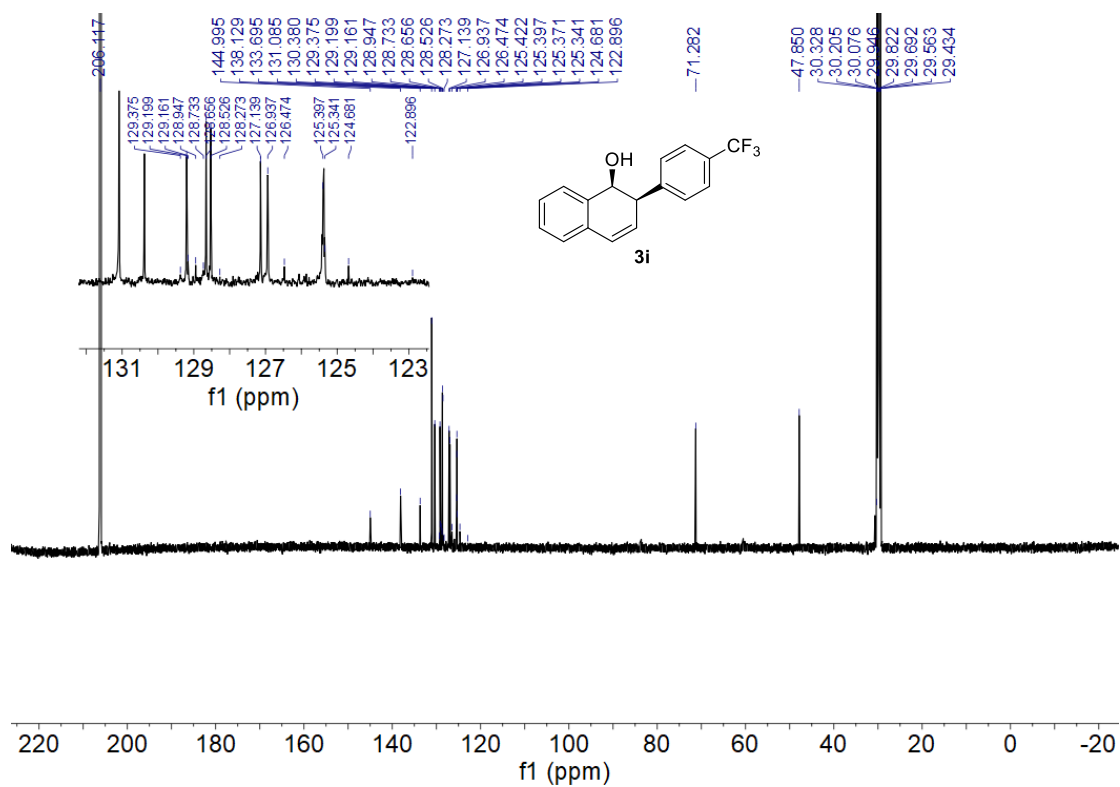

**Figure S22.**  $^{13}\text{C}$  NMR (151 MHz, Acetone- $d_6$ ) for product **3i**.

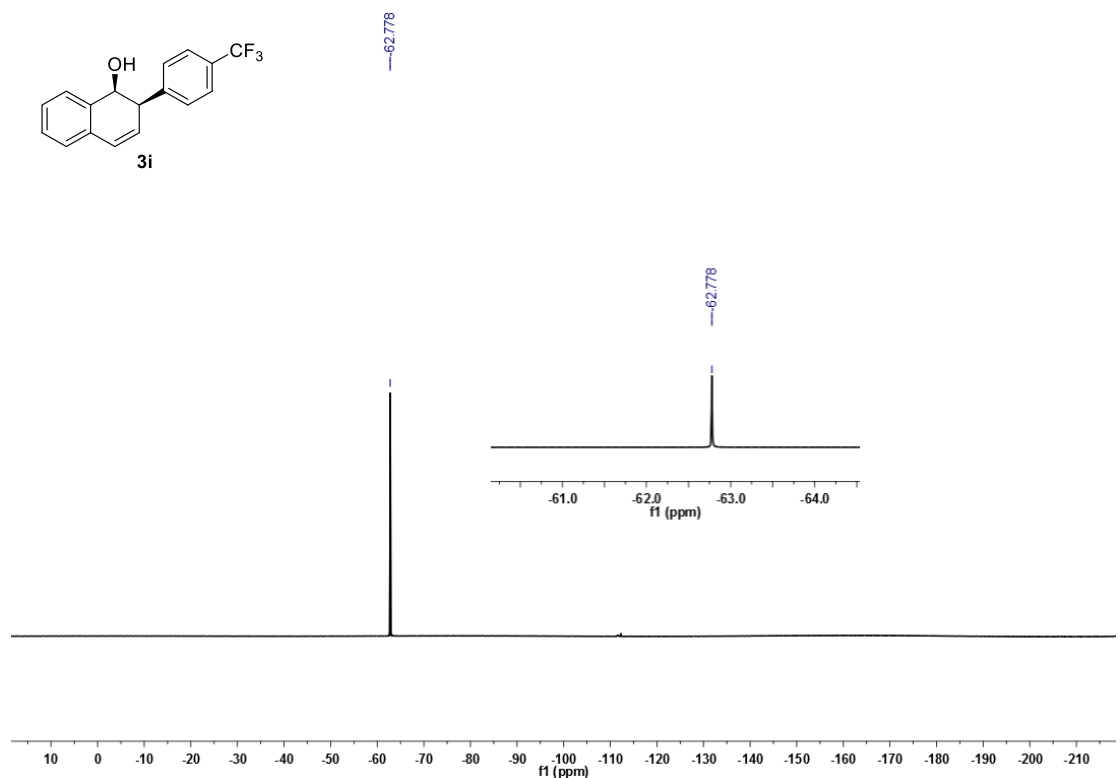

**Figure S23.**  $^{19}\text{F}$  NMR (376 MHz, Acetone- $d_6$ ) for product **3i**.

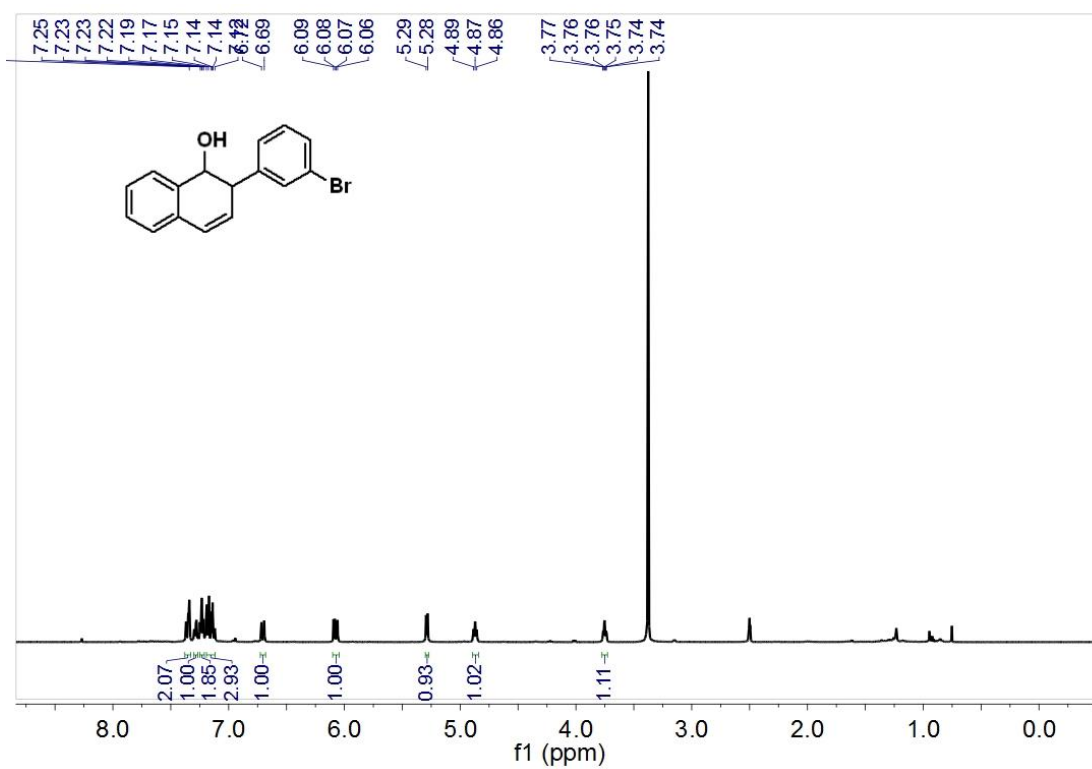

Figure S24.  $^1\text{H}$  NMR (400 MHz,  $\text{DMSO-}d_6$ ) for product 3j.

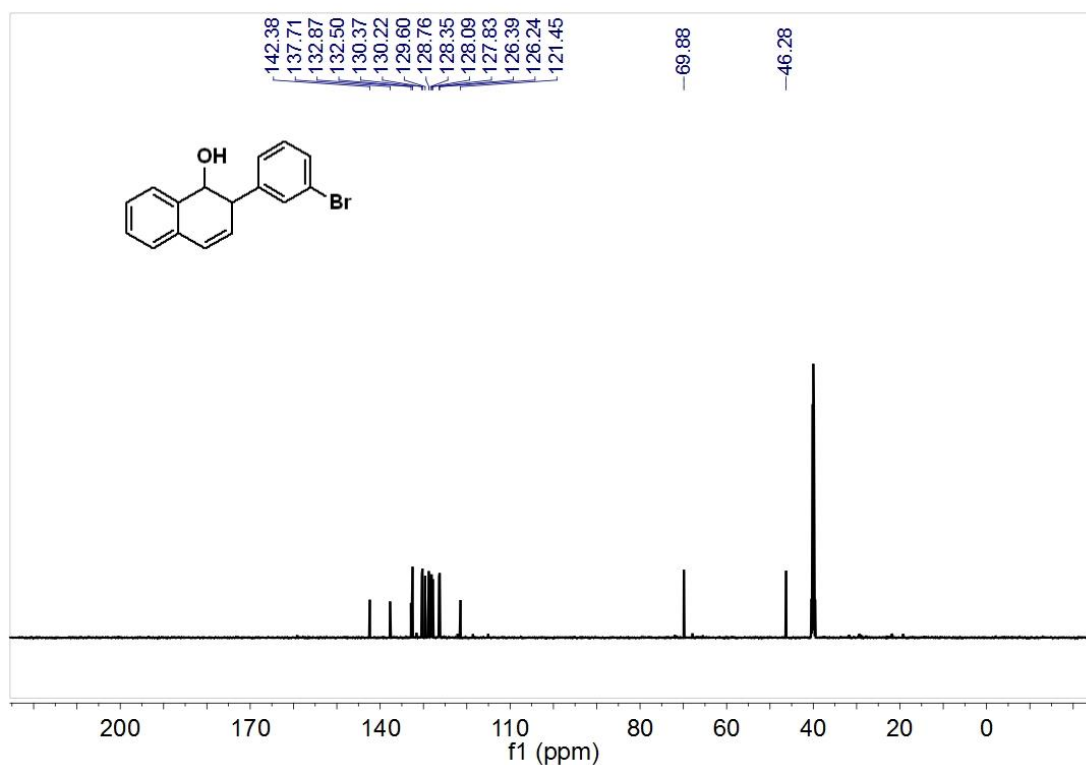

Figure S25.  $^{13}\text{C}$  NMR (151 MHz,  $\text{DMSO-}d_6$ ) for product 3j.

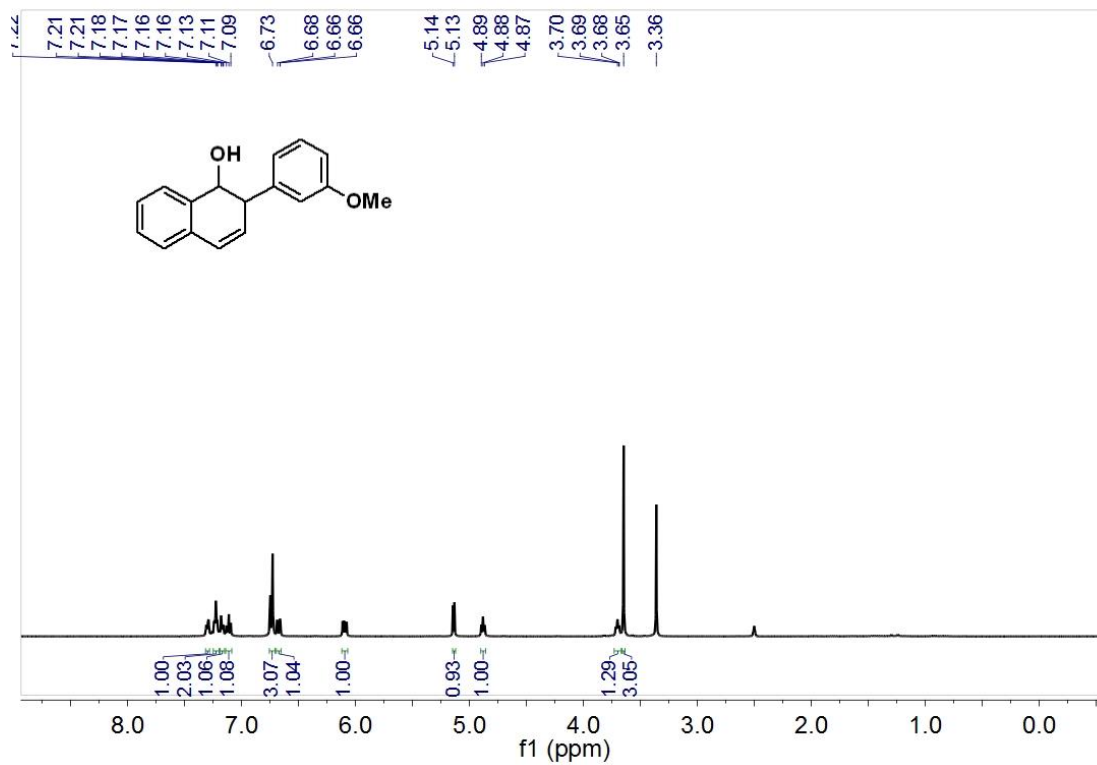

Figure S26.  $^1\text{H}$  NMR (400 MHz,  $\text{DMSO-}d_6$ ) for product **3k**.

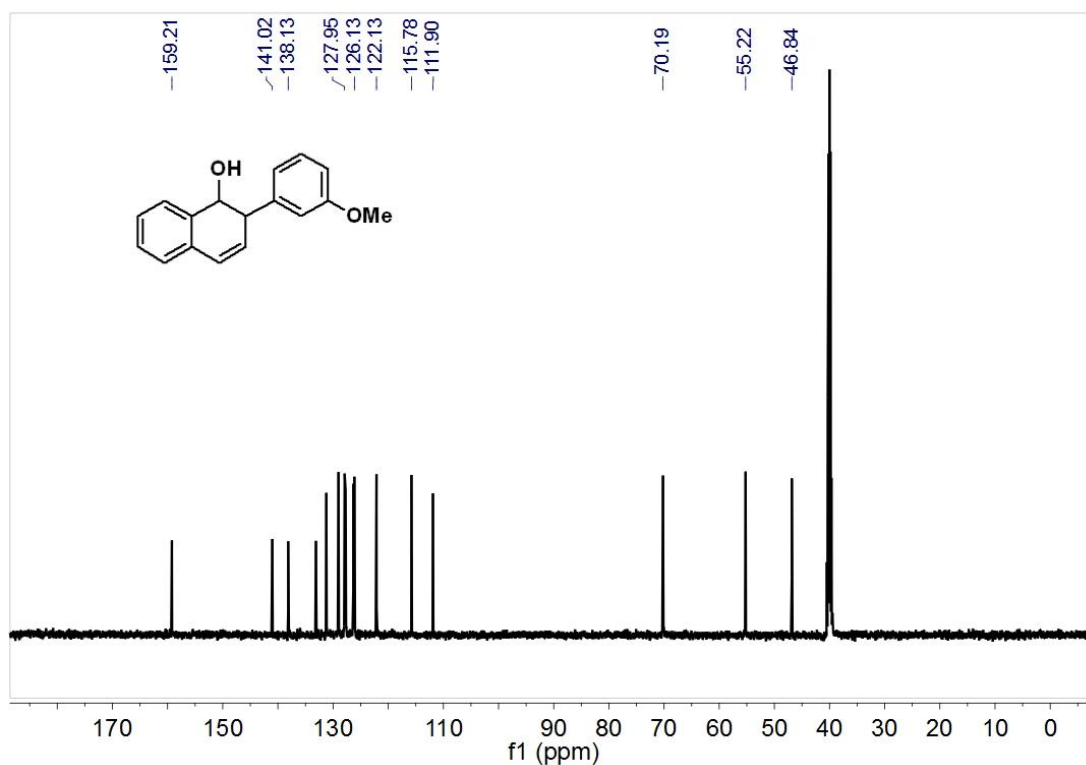

Figure S27.  $^{13}\text{C}$  NMR (126 MHz,  $\text{DMSO-}d_6$ ) for product **3k**.

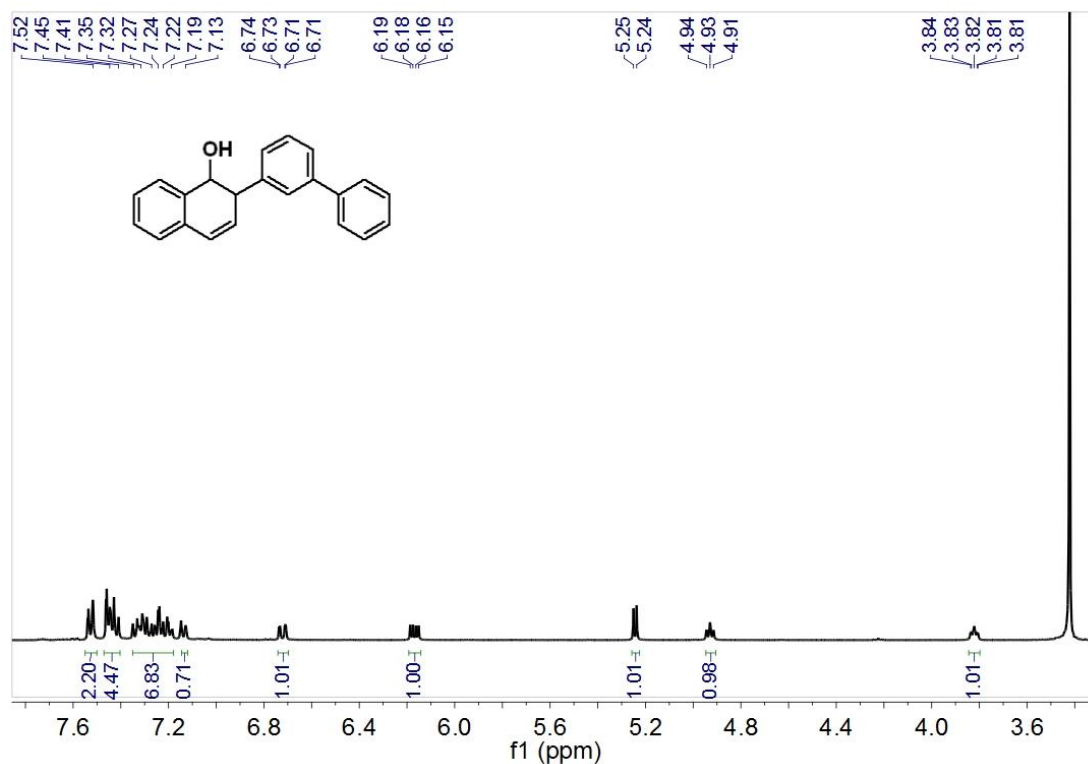

**Figure S28.**  $^1\text{H}$  NMR (400 MHz,  $\text{DMSO-}d_6$ ) for product **31**.

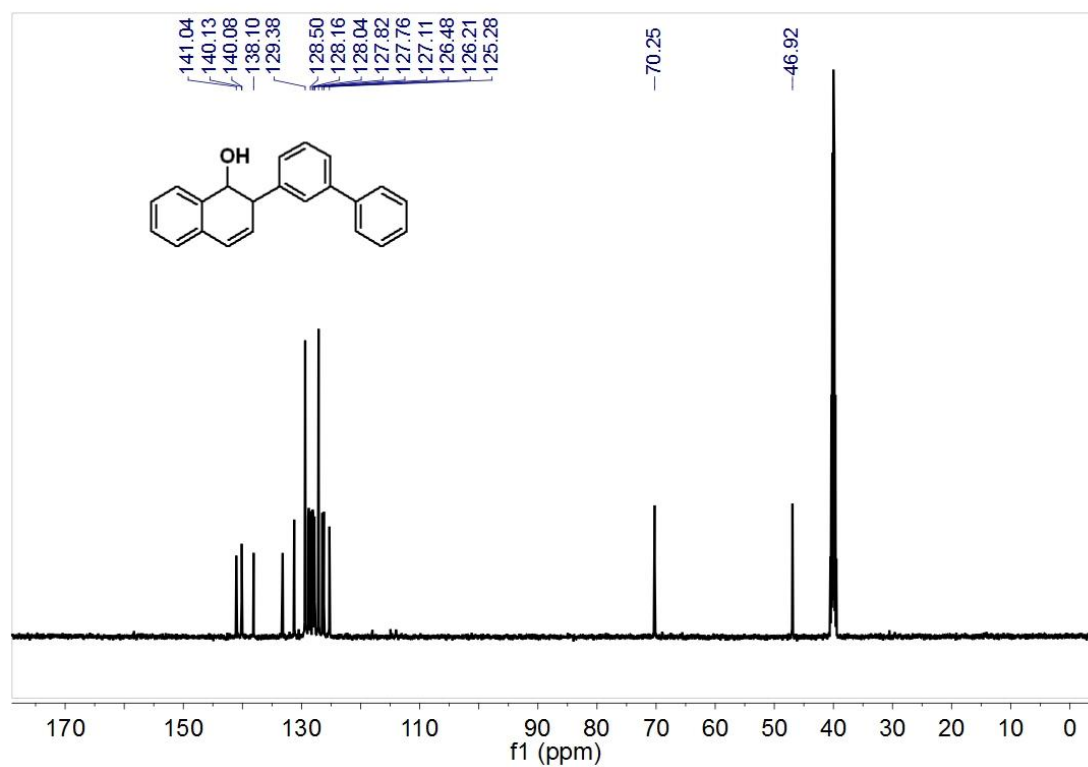

**Figure S29.**  $^{13}\text{C}$  NMR (126 MHz,  $\text{DMSO-}d_6$ ) for product **31**.

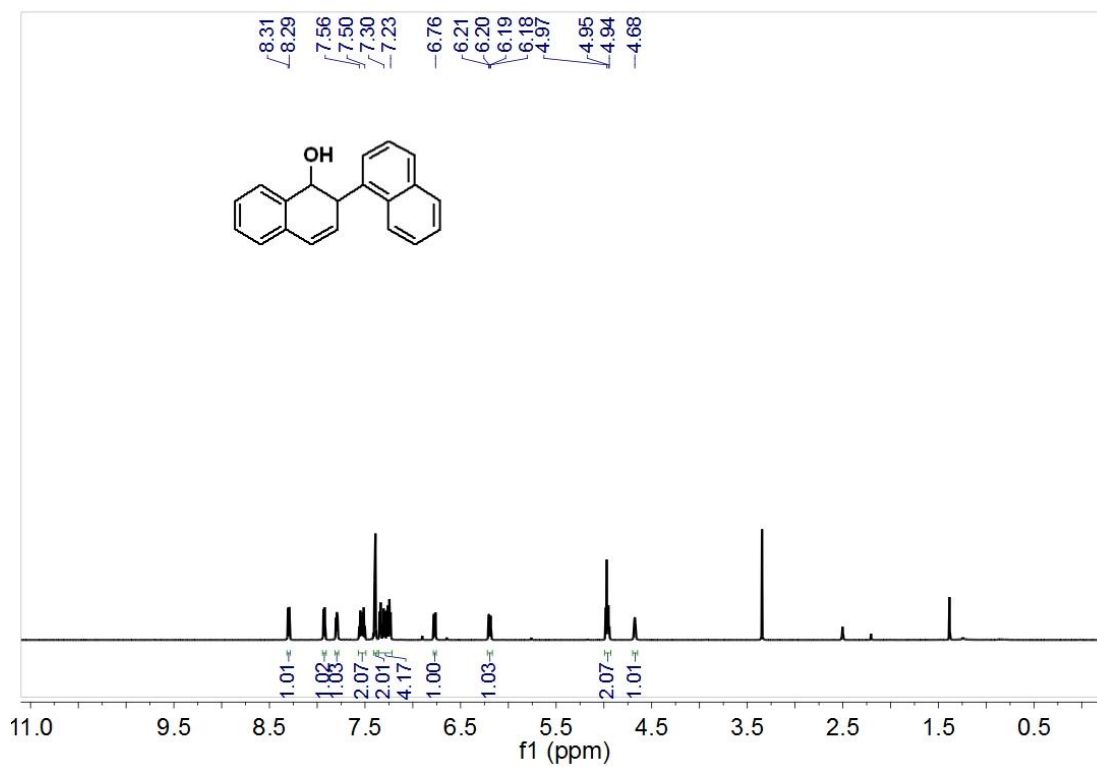

**Figure S30.**  $^1\text{H}$  NMR (600 MHz,  $\text{DMSO-}d_6$ ) for product **3m**.

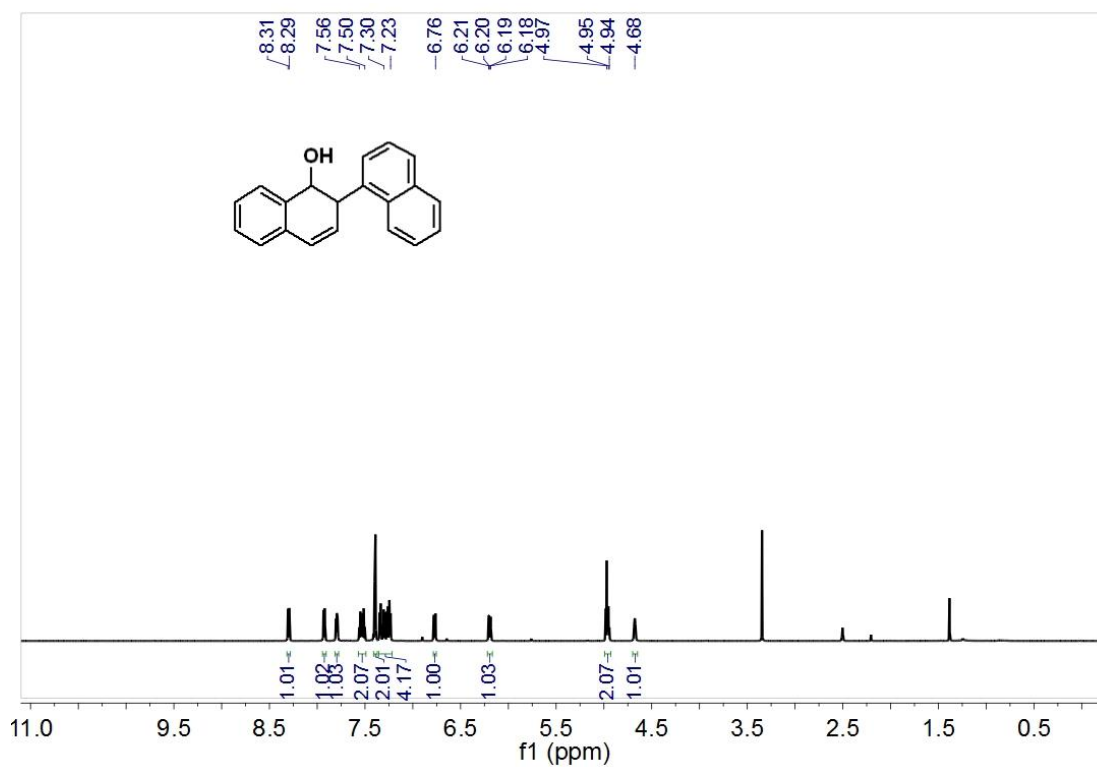

**Figure S31.**  $^{13}\text{C}$  NMR (151 MHz,  $\text{DMSO-}d_6$ ) for product **3m**.



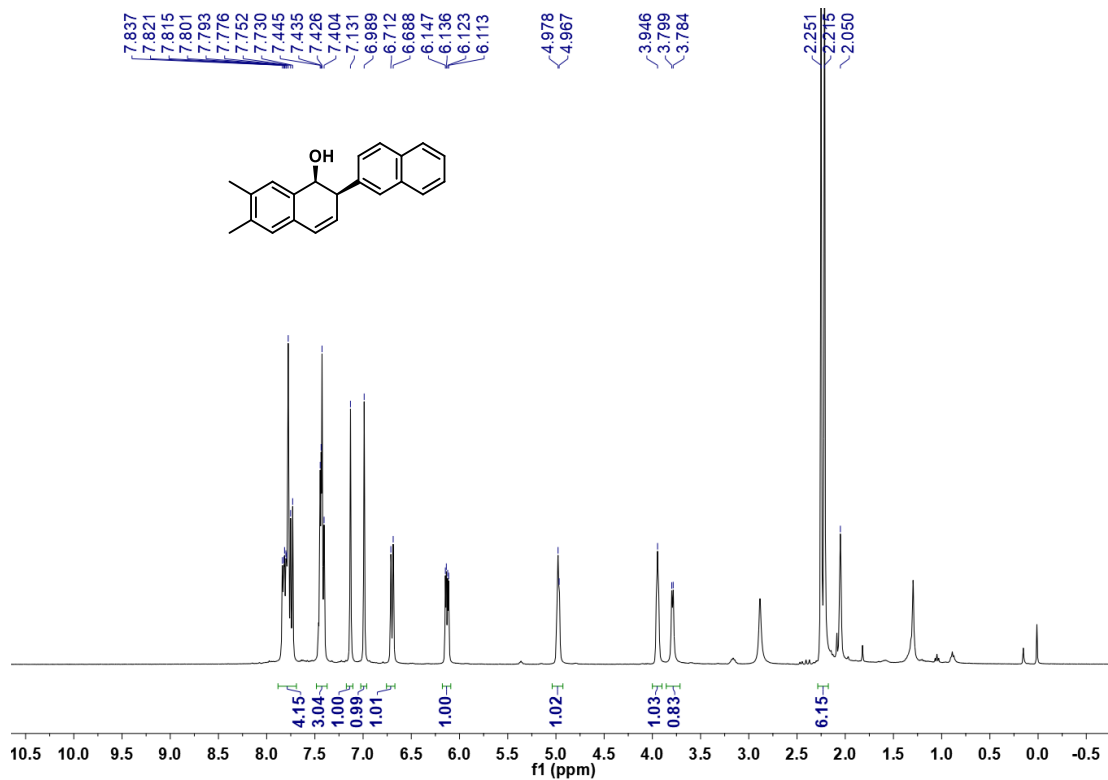

Figure S32.  $^1\text{H}$  NMR (400 MHz, acetone- $d_6$ ) for product **3p**.

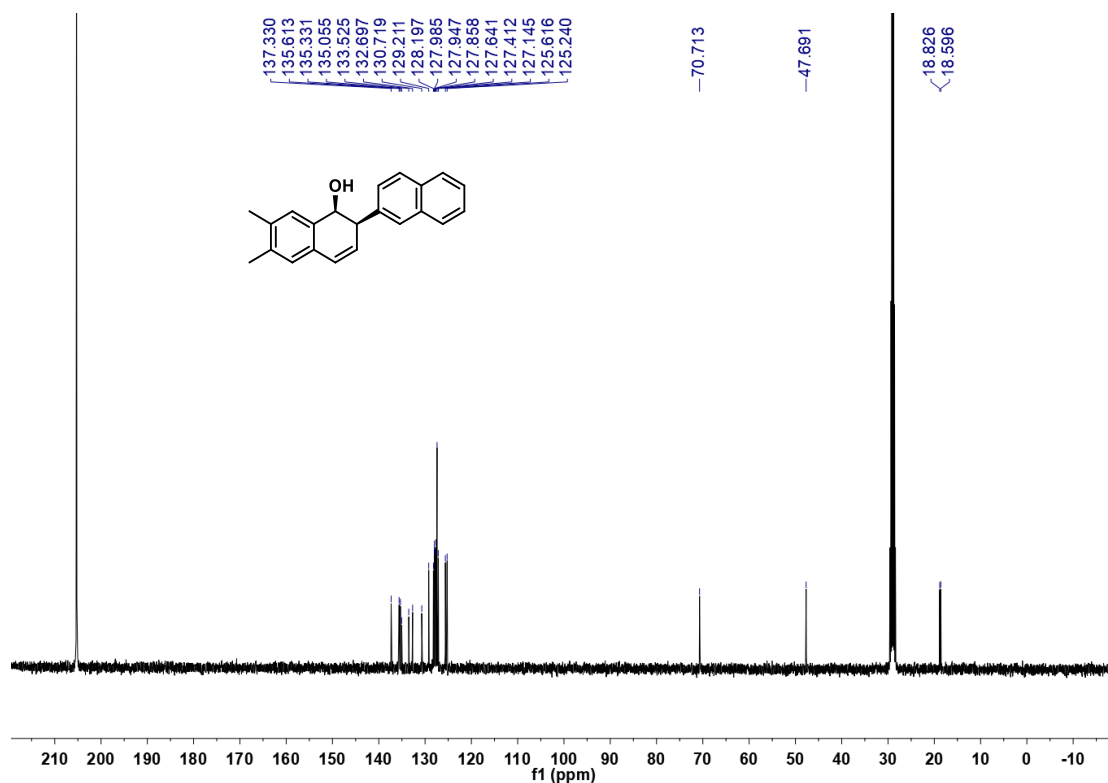

Figure S33.  $^{13}\text{C}$  NMR (101 MHz, acetone- $d_6$ ) for product **3p**.

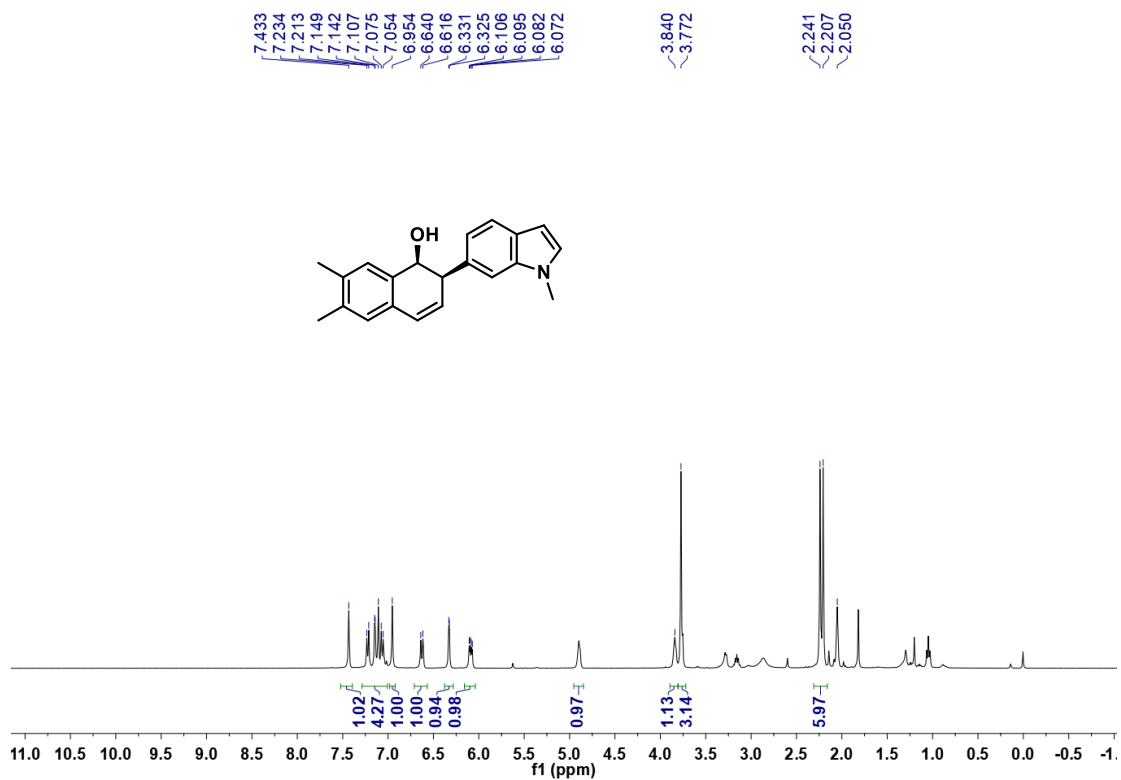

Figure S34. <sup>1</sup>H NMR (400 MHz, acetone-*d*<sub>6</sub>) for product **3q**.

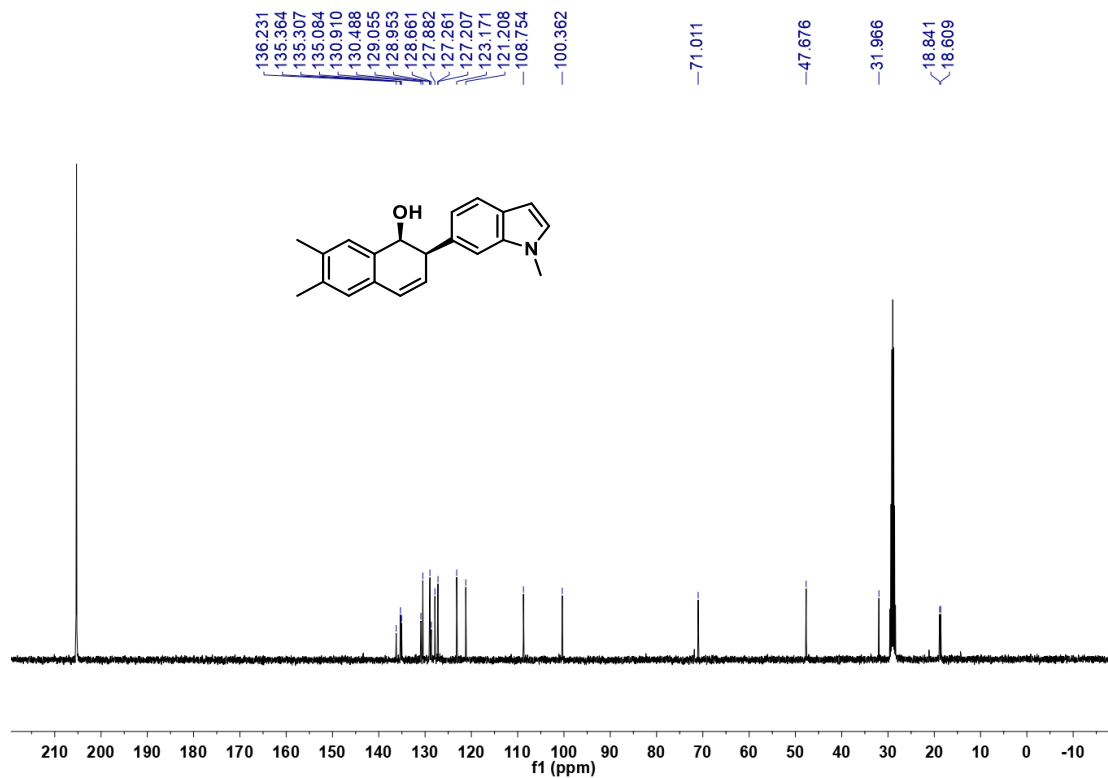

Figure S35. <sup>13</sup>C NMR (101 MHz, acetone-*d*<sub>6</sub>) for product **3q**.

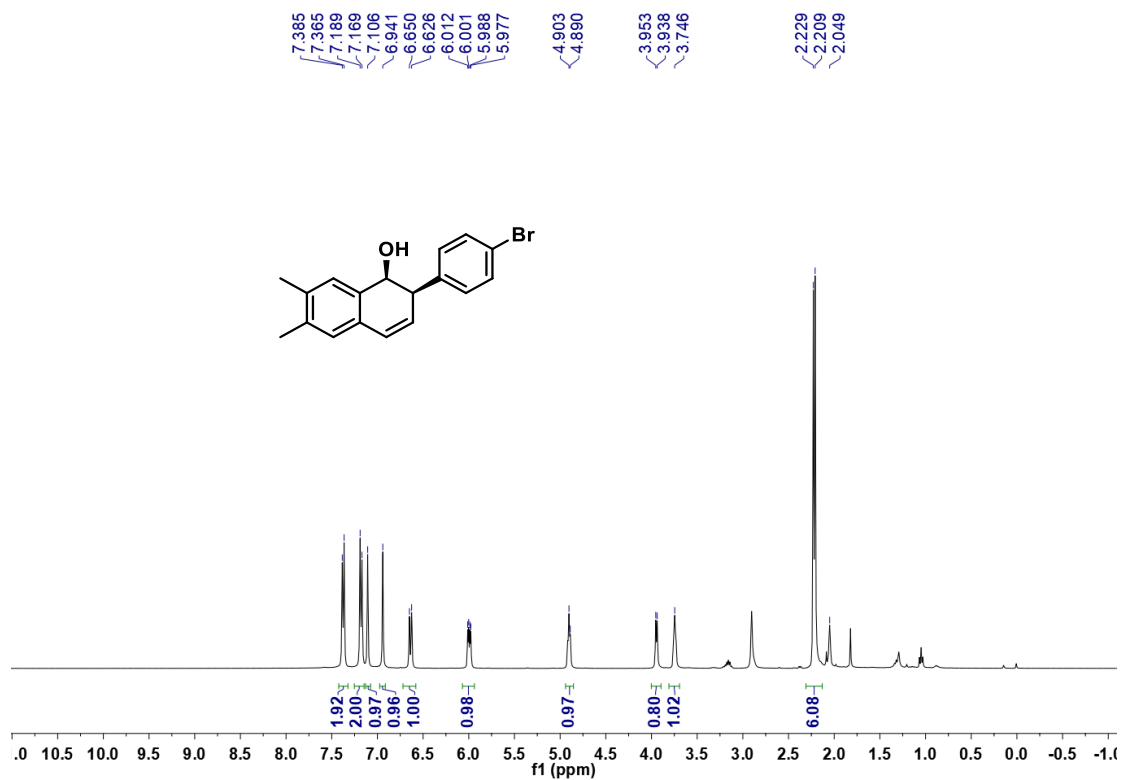

Figure S36. <sup>1</sup>H NMR (400 MHz, acetone-*d*<sub>6</sub>) for product **3r**.

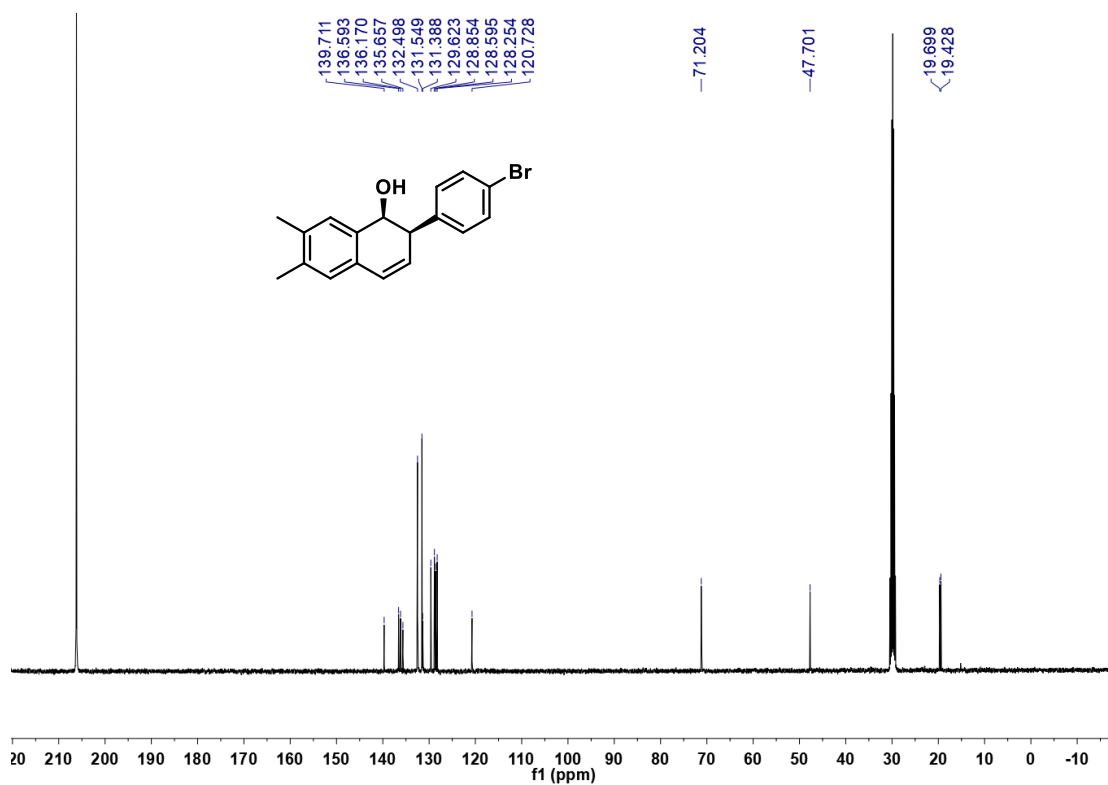

Figure S37. <sup>13</sup>C NMR (101 MHz, acetone-*d*<sub>6</sub>) for product **3r**.

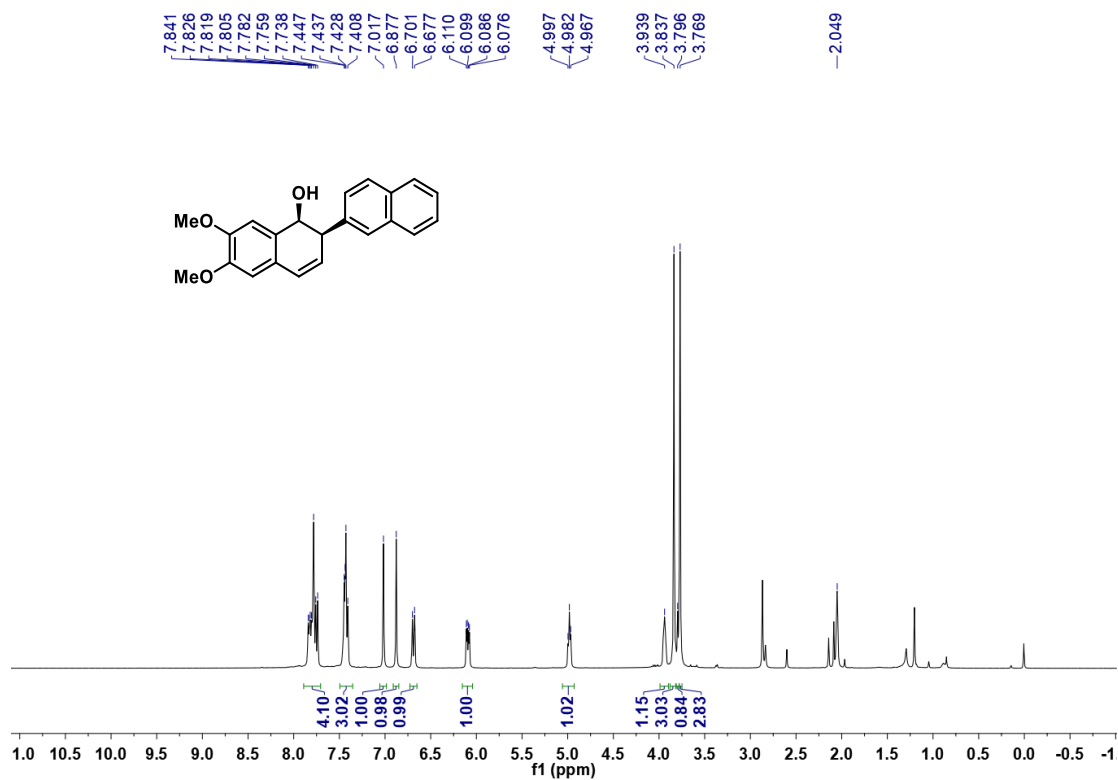

Figure S38. <sup>1</sup>H NMR (400 MHz, acetone-*d*<sub>6</sub>) for product **3e**.

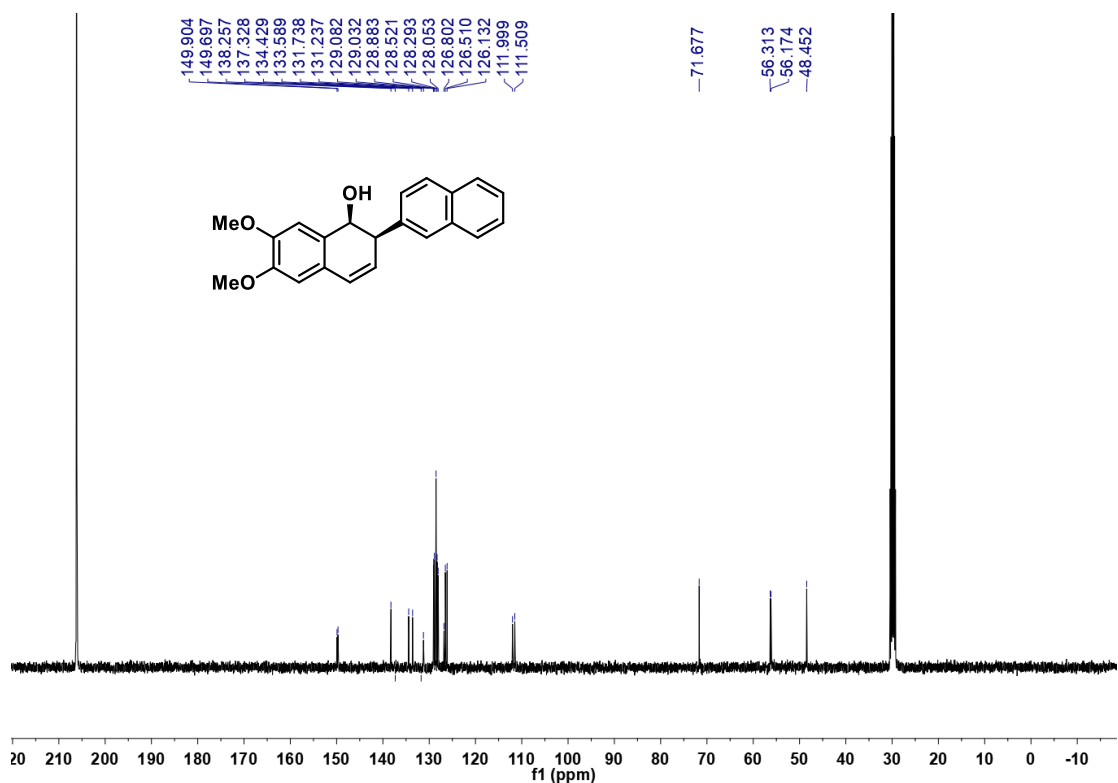

Figure S39. <sup>13</sup>C NMR (101 MHz, acetone-*d*<sub>6</sub>) for product **3e**.

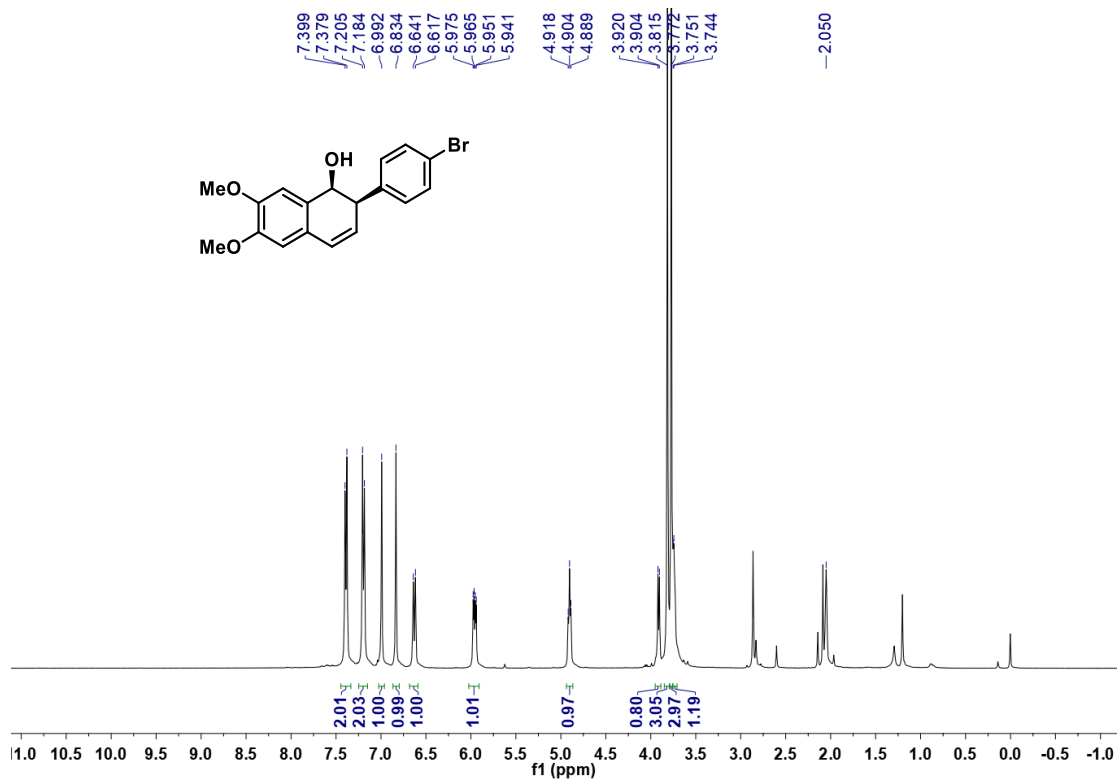

Figure S40.  $^1\text{H}$  NMR (400 MHz, acetone- $d_6$ ) for product **3t**.

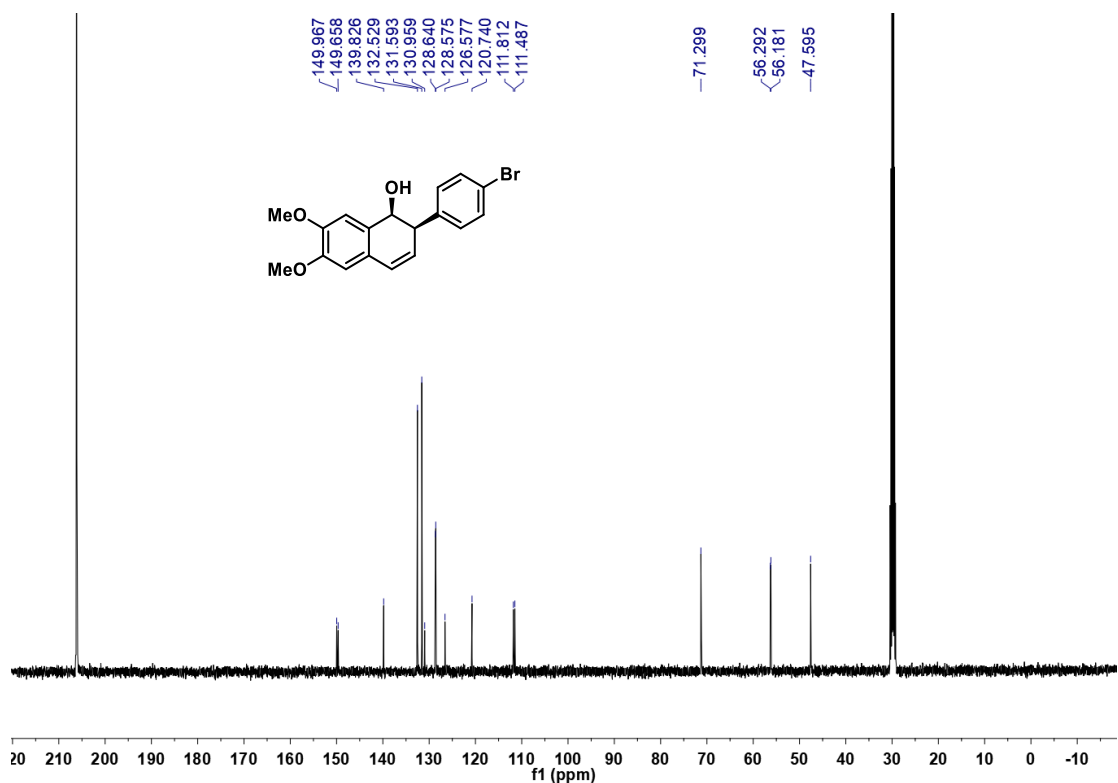

Figure S41.  $^{13}\text{C}$  NMR (101 MHz, acetone- $d_6$ ) for product **3t**.

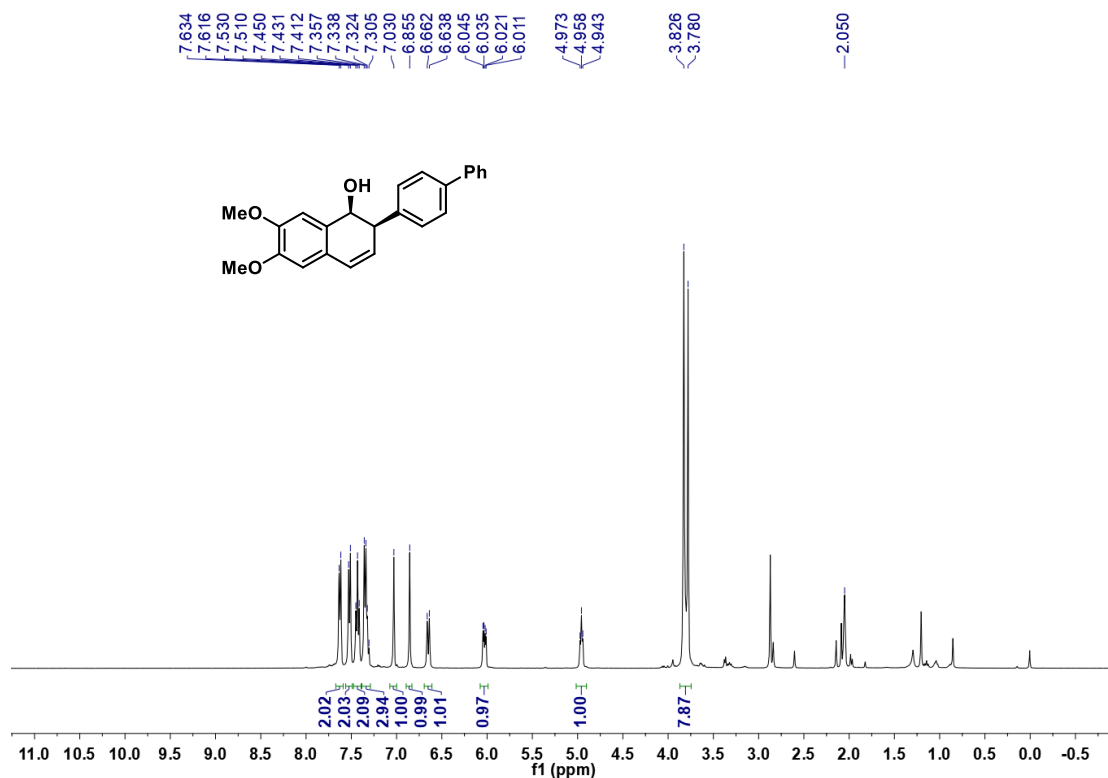

Figure S42. <sup>1</sup>H NMR (400 MHz, acetone-*d*<sub>6</sub>) for product **3u**.

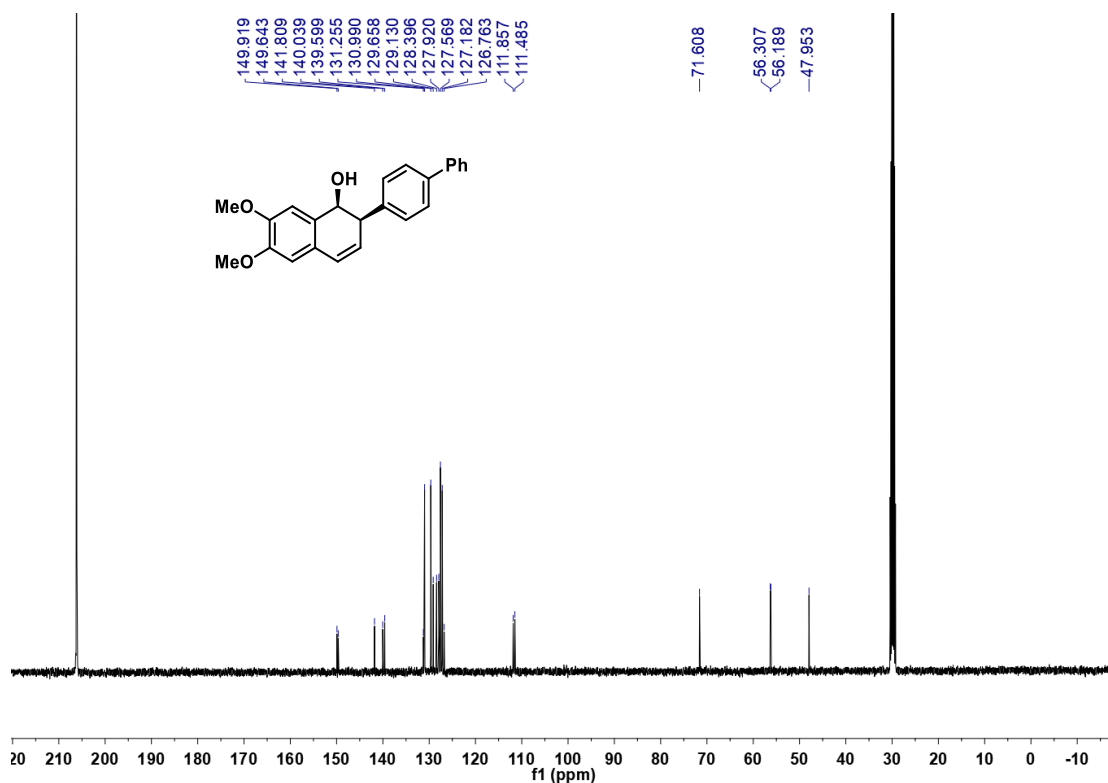

Figure S43. <sup>13</sup>C NMR (101 MHz, acetone-*d*<sub>6</sub>) for product **3u**.

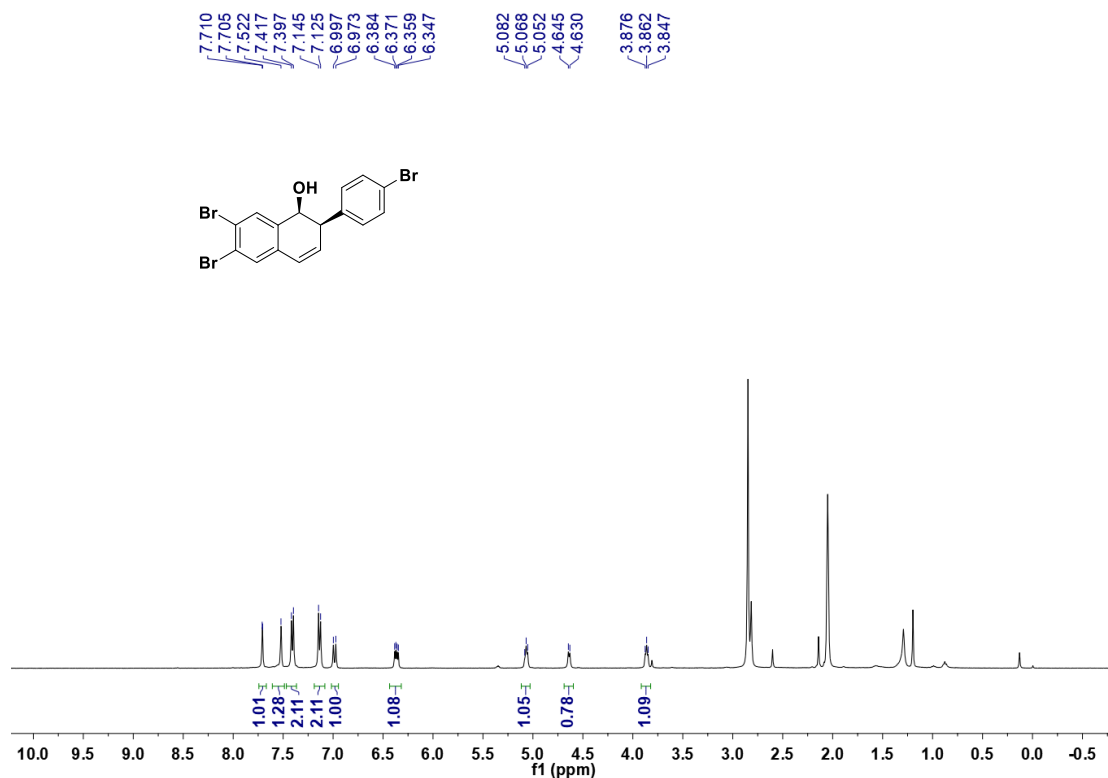

**Figure S44.** <sup>1</sup>H NMR (400 MHz, acetone-*d*<sub>6</sub>) for product **3v**.

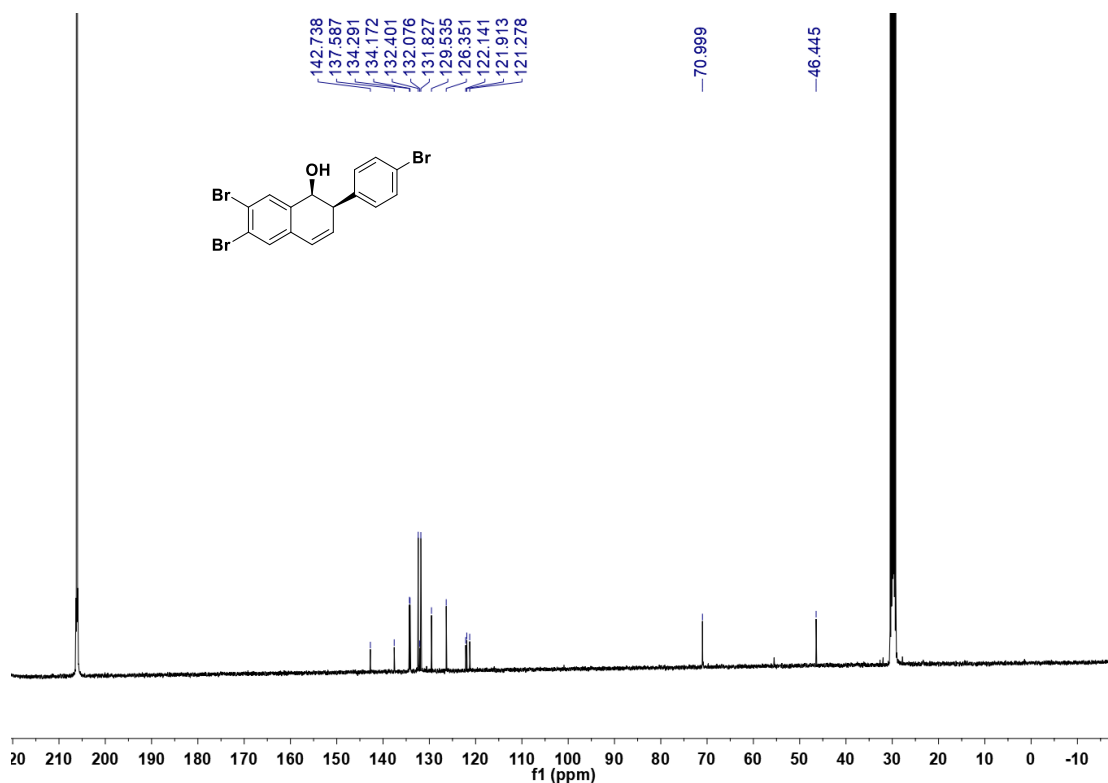

**Figure S45.** <sup>13</sup>C NMR (101 MHz, acetone-*d*<sub>6</sub>) for product **3v**.

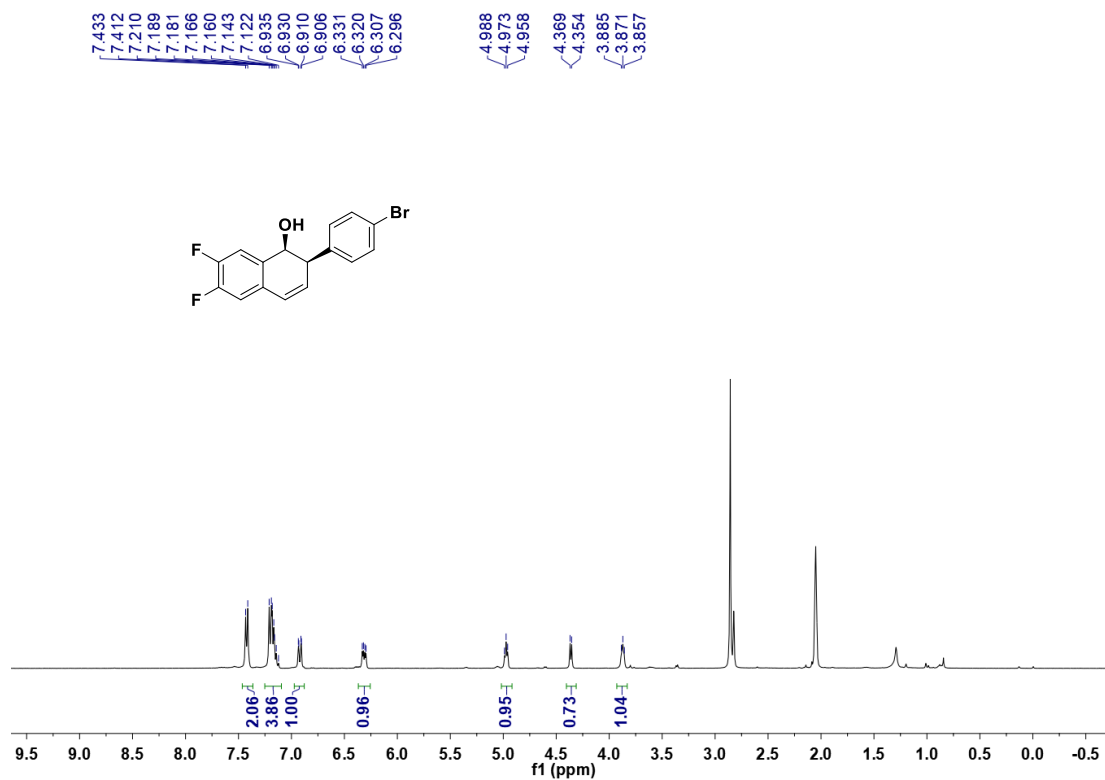

**Figure S46.** <sup>1</sup>H NMR (400 MHz, acetone-*d*<sub>6</sub>) for product **3w**.

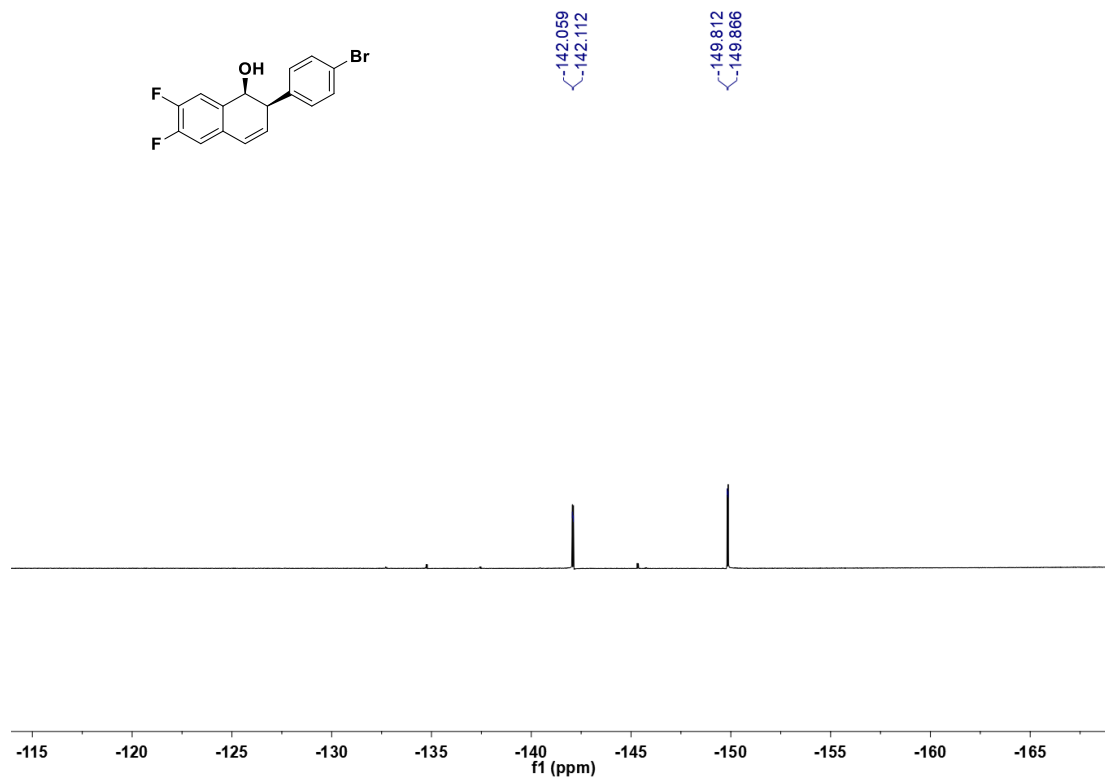

**Figure S47.** <sup>19</sup>F NMR (376 MHz, acetone-*d*<sub>6</sub>) for product **3w**.



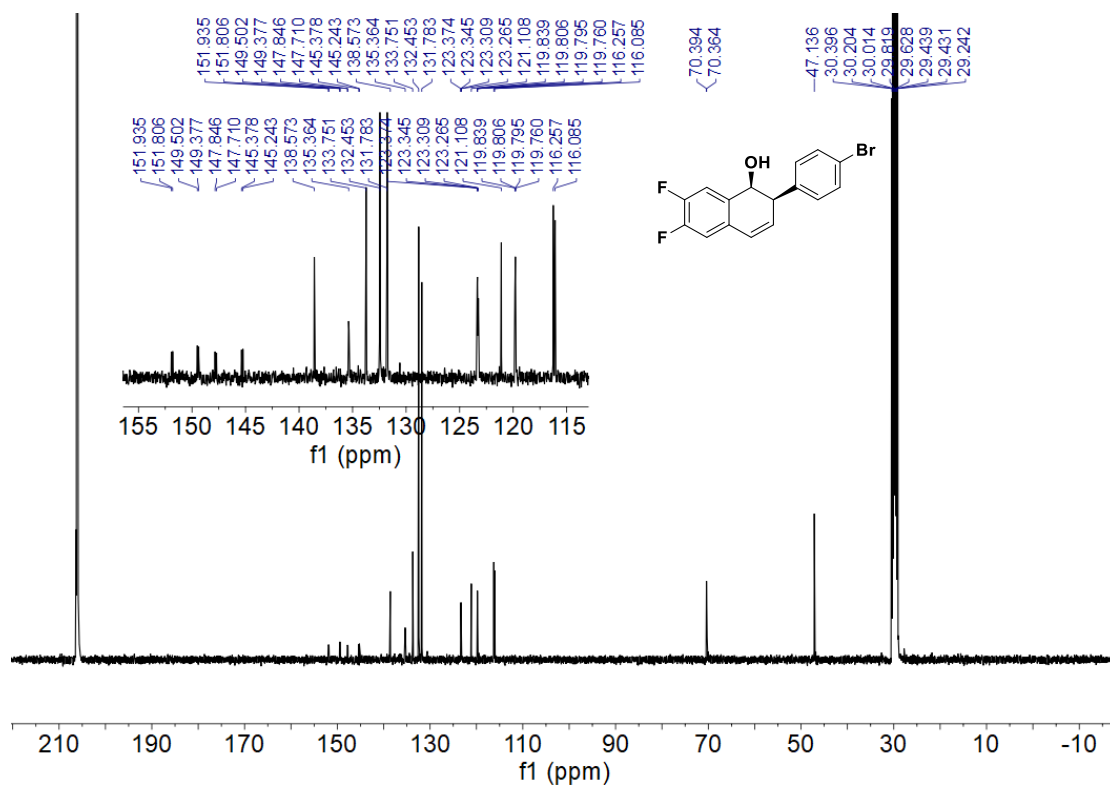

Figure S48.  $^{13}\text{C}$  NMR (101 MHz, acetone- $d_6$ ) for product 3w.

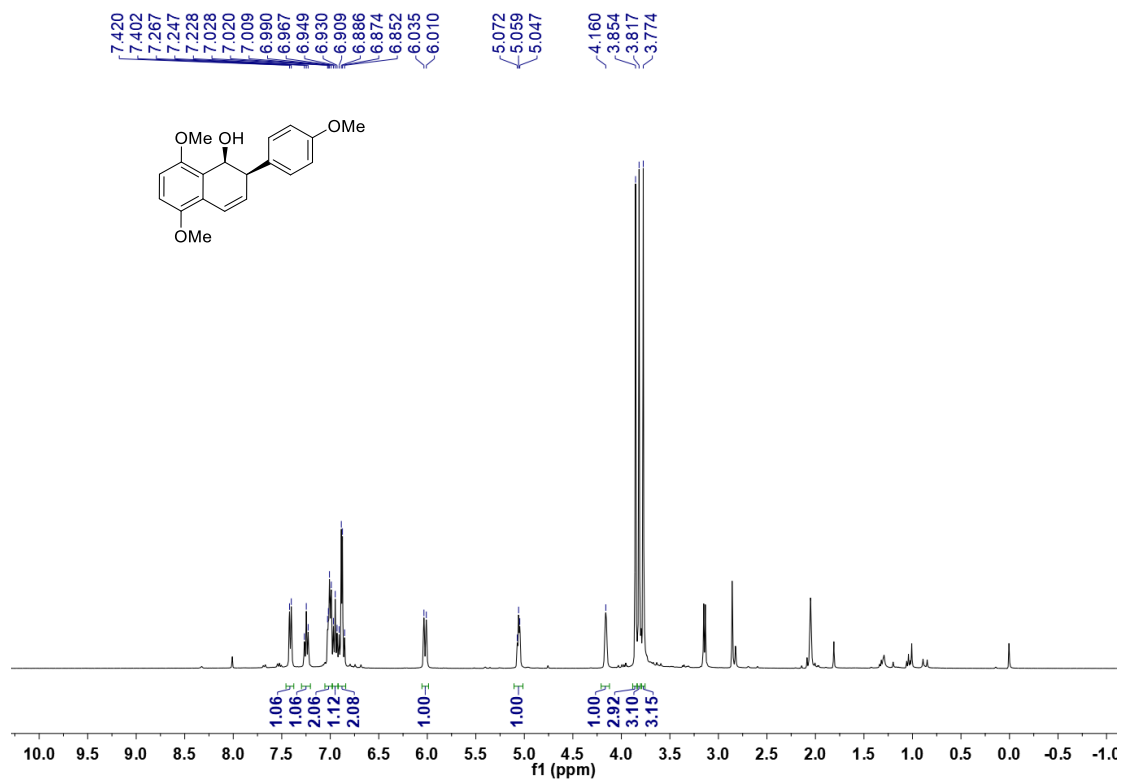

Figure S49.  $^1\text{H}$  NMR (400 MHz, acetone- $d_6$ ) for product 3x.

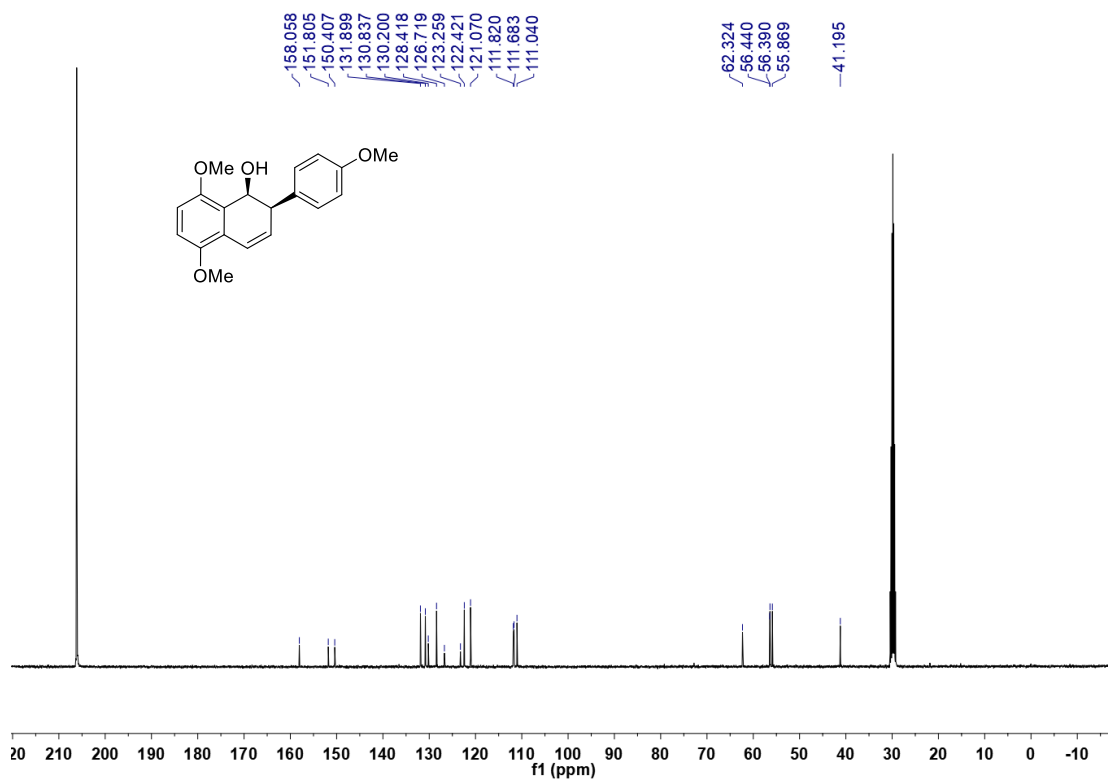

**Figure S50.**  $^{13}\text{C}$  NMR (101 MHz, acetone- $d_6$ ) for product **3x**.

### HPLC analysis of 3a\*

HPLC conditions: chiralpak OD-H column, hexane/*i*-PrOH = 90/10, 1.0ml/min,  $\lambda=254$  nm

#### Racemic sample:

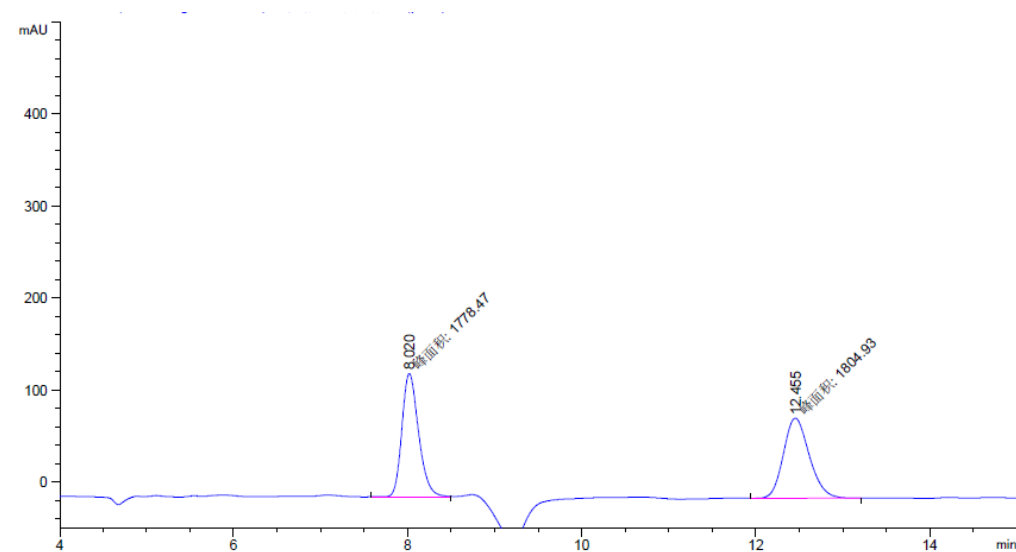

| 峰 # | 保留时间 [min] | 类型 | 峰宽 [min] | 峰面积 [mAU*s] | 峰高 [mAU]  | 峰面积 %   |
|-----|------------|----|----------|-------------|-----------|---------|
| 1   | 8.020      | MM | 0.2212   | 1778.46765  | 133.97203 | 49.6307 |
| 2   | 12.455     | MM | 0.3454   | 1804.93408  | 87.10378  | 50.3693 |

#### Chiral sample:

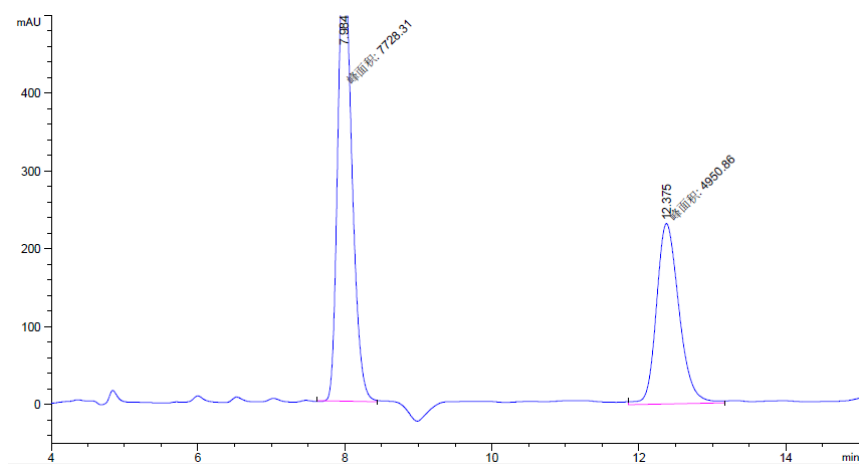

信号 1: VWD1 A, Wavelength=250 nm

| 峰 # | 保留时间 [min] | 类型 | 峰宽 [min] | 峰面积 [mAU*s] | 峰高 [mAU]  | 峰面积 %   |
|-----|------------|----|----------|-------------|-----------|---------|
| 1   | 7.984      | MM | 0.2200   | 7728.30762  | 585.58112 | 60.9528 |
| 2   | 12.375     | MM | 0.3560   | 4950.86328  | 231.75279 | 39.0472 |
